# Supplementary material for: Nickel-catalyzed direct difluoromethylation of aryl boronic acids with BrCF2H
Source: Royal Society of Chemistry journal article supplement (doi:10.1039/c7qo00934h), 2017-11-01

## Supporting Information For

### Combinatorial Nickel-Catalyzed Directly Difluoromethylation of Aryl Boronic Acids

Jie Sheng, Hui-Qi Ni, Kang-Jie Bian, Yan Li, Yi-Ning Wang, Xi-Sheng Wang \*

Hefei National Laboratory for Physical Sciences at the Microscale and Department of Chemistry,  
University of Science and Technology of China,  
96 Jinzhai Road, Hefei, Anhui 230026, China

### Tabel of Contents

|                                                                        |     |
|------------------------------------------------------------------------|-----|
| <b>General Information</b>                                             | S2  |
| <b>Tables of the Optimization of Reaction Conditions</b>               | S3  |
| Ligand Screening                                                       | S3  |
| Ni Source Screening                                                    | S4  |
| Solvent Screening                                                      | S4  |
| Optimization the Amount of Ligands                                     | S5  |
| Optimization of N/P Ligands Combination                                | S5  |
| <b>Preparation of Aryl Boronic Acids</b>                               | S7  |
| <b>General Procedure for Difluoromethylation of Aryl Boronic Acids</b> | S7  |
| <b>Mechanistic Studies</b>                                             | S13 |
| <b>References</b>                                                      | S14 |
| <b><sup>1</sup>H, <sup>19</sup>F, and <sup>13</sup>C NMR Spectra</b>   | S15 |

## General Information:

NMR spectra were recorded on Bruker-400 (400 MHz for  $^1\text{H}$ ; 101 MHz for  $^{13}\text{C}$  and 376 MHz for  $^{19}\text{F}$  { $^1\text{H}$ ,  $^{13}\text{C}$  decoupled}) instruments internally referenced to  $\text{SiMe}_4$  signal. High resolution mass spectra were recorded on P-SIMS-Gly of Bruker Daltonics Inc. using ESI-TOF (electrospray ionization-time of flight) or Micromass GCT using EI (electron impact). Infrared spectra were recorded on a Thermo Scientific Nicolet iS10 as either neat films or solids. 1,4-Dioxane was distilled from sodium immediately and degassed before use.  $\text{Ni}(\text{OTf})_2$ ,  $\text{P}(4\text{-OMePh})_3$  were obtained from Boka chemical and used as received. Bpy, phen were obtained from Energy and used as received. Dtbpy was obtained from Macklin and used as received.  $\text{PCy}_3$  was obtained from J&K and used as received.  $\text{PPh}_3$  and  $\text{K}_2\text{CO}_3$  were purchased from Sinopharm and used as received.  $\text{BrCF}_2\text{H}$  was obtained from Shanghai Qinba Chemical.

## Tables of the Optimization of Reaction Conditions

**Table S1.** Ligands Screening<sup>a</sup>

| Entry | ligand (x mol%)                     | Yield (%) <sup>b</sup> |
|-------|-------------------------------------|------------------------|
| 1     | No                                  | 0                      |
| 2     | phen (5)                            | 12                     |
| 3     | bpy (5)                             | 7                      |
| 4     | dtbpy (5)                           | 21                     |
| 5     | dmbpy (5)                           | 16                     |
| 6     | dombpy (5)                          | 10                     |
| 7     | pyridine (10)                       | 3                      |
| 8     | L1 (5)                              | 9                      |
| 9     | L2 (5)                              | 13                     |
| 10    | L3 (5)                              | 7                      |
| 11    | L4 (5)                              | 3                      |
| 12    | PPh <sub>3</sub> (10)               | trace                  |
| 13    | PCy <sub>3</sub> (10)               | 0                      |
| 14    | dppp(5)                             | trace                  |
| 15    | dppe (5)                            | trace                  |
| 16    | bpy (5)/PPh <sub>3</sub> (10)       | 32                     |
| 17    | dtbpy(5)/PPh <sub>3</sub> (10)      | 62(72)                 |
| 18    | dtbpy(5)/dppe(5)                    | 59                     |
| 19    | dtbpy(5)/dppe(5)                    | 21                     |
| 20    | dtbpy(5)/dppb(5)                    | 53                     |
| 21    | dtbpy(5)/Pt-Bu <sub>3</sub> (10)    | 42                     |
| 22    | bpy(5)/P(4-OMePh) <sub>3</sub> (10) | 45                     |
| 23    | phen(5)/PCy <sub>3</sub> (10)       | 44                     |

<sup>a</sup> Unless otherwise noted, the reaction conditions were as follows: **1a** ( 2.0 equiv), **2** (0.2 mmol, 1.0 equiv), Ni(OTf)<sub>2</sub> (5 mol%), ligands, K<sub>2</sub>CO<sub>3</sub> (3.0 equiv), 1,4-dioxane (2.0 mL), 80 °C, 24 h, N<sub>2</sub>, 25 mL tube. <sup>b</sup> Yields determined by <sup>19</sup>F NMR using PhOCF<sub>3</sub> as an internal standard; numbers in parentheses were isolated yields

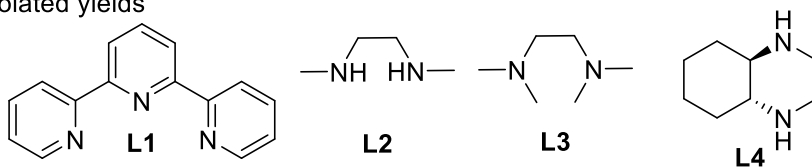

**Table S2.** Ni-Source Screening<sup>a</sup>

| Entry | [Ni]                                               | Yield (%) <sup>b</sup> | Entry     | [Ni]                                                 | Yield (%) <sup>b</sup>     |
|-------|----------------------------------------------------|------------------------|-----------|------------------------------------------------------|----------------------------|
| 1     | No                                                 | 0                      | 8         | NiCl <sub>2</sub> (dppe)                             | 36                         |
| 2     | NiBr <sub>2</sub>                                  | 47                     | 9         | NiCl <sub>2</sub> (dppf)                             | 10                         |
| 3     | NiI <sub>2</sub>                                   | 26                     | <b>10</b> | <b>Ni(OTf)<sub>2</sub></b>                           | <b>82 (94)<sup>c</sup></b> |
| 4     | NiCl <sub>2</sub>                                  | 0                      | 11        | Ni(NO <sub>3</sub> ) <sub>2</sub> •6H <sub>2</sub> O | 17                         |
| 5     | Ni(acac) <sub>2</sub>                              | 0                      | 12        | NiCl <sub>2</sub> (dme)                              | 6                          |
| 6     | NiCl <sub>2</sub> (PPh <sub>3</sub> ) <sub>2</sub> | trace                  | 13        | Ni(OAc) <sub>2</sub>                                 | 11                         |
| 7     | NiCl <sub>2</sub> (dppp)                           | 50                     |           |                                                      |                            |

<sup>a</sup> Unless otherwise noted, the reaction conditions were as follows: **1a** (2.0 equiv), **2** (0.2 mmol, 1.0 equiv), [Ni] (5 mol%), bpy (5 mol%), P(4-OMePh)<sub>3</sub> (10 mol%), K<sub>2</sub>CO<sub>3</sub> (3.0 equiv), 1,4-dioxane (2.0 mL), 80 °C, 24 h, N<sub>2</sub>. <sup>b</sup> Yields determined by <sup>19</sup>FNMR using PhOCF<sub>3</sub> as an internal standard; numbers in parentheses were isolated yields. <sup>c</sup> Reaction was performed in 5 mL sealed tube

**Table S3** Solvent Screening<sup>a</sup>

| entry | solvent            | yield (%) <sup>b</sup> |
|-------|--------------------|------------------------|
| 1     | THF                | 47                     |
| 2     | DMF                | 21                     |
| 3     | DCM                | 0                      |
| 4     | CHCl <sub>3</sub>  | 12                     |
| 5     | CH <sub>3</sub> CN | 3                      |
| 6     | Toluene            | 0                      |
| 7     | EA                 | 6                      |

<sup>a</sup> Unless otherwise noted, the reaction conditions were as follows: **1a** (2.0 equiv), **2** (0.2 mmol, 1.0 equiv), NiOTf<sub>2</sub> (5 mol%), dtbpy (5 mol%), PPh<sub>3</sub> (10 mol%), K<sub>2</sub>CO<sub>3</sub> (3.0 equiv), solvent (2.0 mL), 80 °C, 24 h, N<sub>2</sub>, 5 mL sealed tube. <sup>b</sup> Yields determined by <sup>19</sup>FNMR using PhOCF<sub>3</sub> as an internal standard.

**Table S4** Optimization the amount of ligands<sup>a</sup>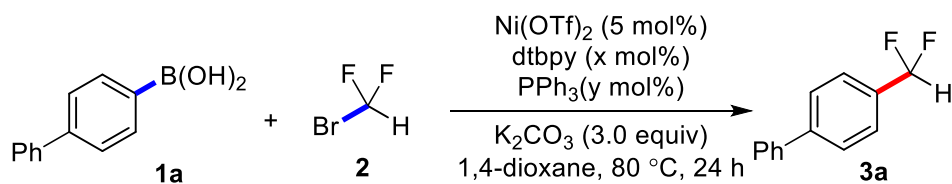

| entry | x  | y  | yield (%) <sup>b</sup> |
|-------|----|----|------------------------|
| 1     | 5  | 0  | 22                     |
| 2     | 10 | 0  | 19                     |
| 3     | 15 | 0  | 26                     |
| 4     | 0  | 5  | 0                      |
| 5     | 0  | 10 | 0                      |
| 6     | 0  | 20 | 0                      |
| 7     | 5  | 5  | 70                     |
| 8     | 5  | 15 | 86 (94)                |
| 9     | 10 | 10 | 81                     |

<sup>a</sup> Unless otherwise noted, the reaction conditions were as follows: **1a** (2.0 equiv), **2** (0.2 mmol, 1.0 equiv),  $\text{Ni}(\text{OTf})_2$  (5 mol%), bpy (x mol%),  $\text{PPh}_3$  (y mol%),  $\text{K}_2\text{CO}_3$  (3.0 equiv), 1,4-dioxane (2 mL), 80 °C, 24 h,  $\text{N}_2$ , 5 mL sealed tube. <sup>b</sup> Yields determined by  $^{19}\text{F}$ NMR using  $\text{PhOCF}_3$  as an internal standard; numbers in parentheses were isolated yields..

**Table S5** Optimization of N, P ligands combination<sup>a, b</sup>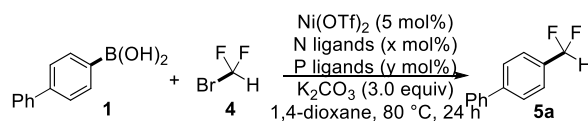

| N, P ligand(mol%)                         | bpy(5) | dtbpy(5)      | dmbpy(5) | dombpy(5) | phen(5)       | Neocuproine(5) | Bphen(5) | DMEDA(5) | TMEDA(5) | Py(10) | DMAP(10) | 4-CN-Py(10) |
|-------------------------------------------|--------|---------------|----------|-----------|---------------|----------------|----------|----------|----------|--------|----------|-------------|
| $\text{PPh}_3$ (10)                       | 32     | <b>82(94)</b> | 43       | 75        | 70            | 0              | 46       | 17       | 1        | 0      | 8        | 3           |
| $\text{PCy}_3$ (10)                       | 18     | <b>83(94)</b> | 18       | 39        | 60            | 0              | 76       | 41       | 2        | 0      | 11       | 4           |
| $\text{P}(4\text{-OMePh})_3$ (10)         | 38     | <b>88(98)</b> | 59       | 59        | 29            | 2              | 77       | 35       | 0        | 0      | 12       | 3           |
| $\text{P}(4\text{-MePh})_3$ (10)          | 57     | 74            | 58       | 55        | 40            | 0              | 79       | 26       | 0        | 0      | 14       | 1           |
| $\text{PAd}_2\text{Bn}$ (10)              | 40     | 54            | 28       | 64        | 47            | 0              | 44       | 18       | 3        | 1      | 7        | 0           |
| $\text{PAd}_2(n\text{-Bu})$ (10)          | 64     | 78            | 49       | 47        | 72            | 3              | 65       | 21       | 0        | 2      | 6        | 0           |
| $\text{P}(\text{NEt}_2)_3$ (10)           | 74     | 59            | 70       | 72        | 61            | 1              | 79       | 26       | 0        | 0      | 11       | 0           |
| $\text{P}(t\text{-Bu})_3\text{BF}_4$ (10) | 18     | <b>82(89)</b> | 68       | 52        | 32            | 0              | 39       | 19       | 0        | 0      | 10       | 2           |
| BINAP                                     | 14     | 31            | 17       | 36        | 6             | 0              | 43       | 9        | 0        | 0      | 18       | 0           |
| dppe(5)                                   | 12     | 21            | 55       | 50        | 31            | 10             | 43       | 1        | 0        | 0      | 7        | 0           |
| dppb(5)                                   | 25     | 50            | 51       | 28        | 24            | 9              | 55       | 8        | 2        | 2      | 7        | 2           |
| dpph(5)                                   | 37     | <b>86(90)</b> | 73       | 60        | <b>90(95)</b> | 26             | 67       | 18       | 4        | 3      | 19       | 6           |
| dppf(5)                                   | 24     | 53            | 34       | 32        | 25            | 1              | 47       | 4        | 1        | 0      | 17       | 0           |
| Xantphos(5)                               | 9      | 18            | 22       | 15        | 9             | 0              | 18       | 6        | 3        | 0      | 4        | 0           |
| X-phos(10)                                | 19     | 65            | 43       | 49        | 29            | 0              | 41       | 10       | 7        | 0      | 10       | 0           |

Unless otherwise noted, the reaction conditions were as follows: **1** (2.0 equiv), **4** (1.0 equiv),  $\text{Ni}(\text{OTf})_2$  (5 mol%), N ligand (x mol%), P ligand (y mol%),  $\text{K}_2\text{CO}_3$  (3.0 equiv), 1,4-dioxane (2 mL), 80 °C, 24 h,  $\text{N}_2$ , 5 mL sealed tube. Yields determined by  $^{19}\text{F}$ NMR using  $\text{PhOCF}_3$  as an internal standard; numbers in parentheses were isolated yields.



## Preparation of Aryl boronic acids

Boronic acids **1n**<sup>1</sup>, **1x**<sup>2</sup> and **6**<sup>3</sup> were synthesized via known methods. Compound **4**<sup>4</sup> was synthesized via known method.

## Preparation of BrCF<sub>2</sub>H Stock Solution<sup>5</sup>

Dry 1, 4-dioxane (~23 mL) was added to a Schlenk graduated cylinder under nitrogen. The vessel and solvent were weighed. Next, BrCF<sub>2</sub>H was bubbled through the 1,4-dioxane solution using a long needle until the total volume of the solution reached approximately 25 mL. The vessel was sealed weighed again. The concentration of the BrCF<sub>2</sub>H stock solution was calculated based on the mass of BrCF<sub>2</sub>H added and the total volume of the solution (~1.0 mol/L).

## General Procedure for Nickel-Catalyzed Cross-Coupling between Aryl boronic Acids and Difluorobromomethane

Ni(OTf)<sub>2</sub> (5 mol %, 0.01 mmol, 3.6 mg), N ligand (5 mol%, 0.01 mmol), P ligand (5 mol%, 0.01 mmol for biphosphine ligands, or 10 mol%, 0.02 mmol for monophosphine ligands), phenylboronic acid **1** (2.0 equiv, 0.4 mmol) and K<sub>2</sub>CO<sub>3</sub> (3.0 equiv, 0.6 mmol, 82.8 mg) were combined in a 5 mL oven-dried sealing tube. The vessel was evacuated and backfilled with N<sub>2</sub> (repeated for 3 times), and **2** (1.0 equiv, 0.2 mmol), 1, 4-dioxane (2.0 mL) were then added via syringe. The tube was sealed with a Teflon lined cap and heated in a preheated oil bath at 80 °C for 24 h. The reaction mixture was then cooled to room temperature, diluted with EtOAc and filtered through a pad of celite. The filtrate was concentrated under vacuum and purified by flash column chromatography (PE) to give **3** as colorless solid or oil.

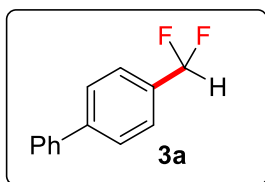

**4-(difluoromethyl)-1,1'-biphenyl (3a):** dtbpy (5 mol%), PPh<sub>3</sub> (10 mol%) were used as ligands, the reaction was run for 24 h. The product **3a** was purified with silica gel chromatography (PE) as a colorless solid (92% yield). This compound is known.<sup>6</sup> <sup>1</sup>H NMR (400 MHz, CDCl<sub>3</sub>) δ 7.65 (d, J = 8.0 Hz, 2H), 7.57 (t, J = 7.6 Hz, 4H), 7.45 (t, J = 7.4 Hz, 2H), 7.37 (t, J = 7.3 Hz, 1H), 6.67 (t, J = 56.5 Hz, 1H). <sup>19</sup>F NMR (376 MHz, CDCl<sub>3</sub>) δ -110.23 (d, J = 56.5 Hz). <sup>13</sup>C NMR (101 MHz, CDCl<sub>3</sub>) δ 143.80 (t, J = 1.8 Hz), 140.28 (s), 133.31 (t, J = 22.5 Hz), 129.05 (s), 128.03 (s), 127.55 (s), 127.37 (s), 126.16 (t, J = 6.0 Hz), 114.89 (t, J = 238.4 Hz).

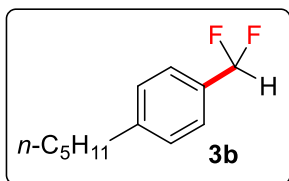

**1-(difluoromethyl)-4-pentylbenzene (3b):** dtbpy (5 mol%), PPh<sub>3</sub> (10 mol%) were used as ligands, the reaction was run for 24 h. **Note:** The product **3b** was isolated with silica gel chromatography (PE) to give a unseparated mixture with homo-coupling biarene as a colorless oil, the yield (85% yield) was determined by the ratio of the mixture via <sup>1</sup>H NMR analysis (10:1). <sup>1</sup>H NMR (400 MHz, CDCl<sub>3</sub>) δ 7.41 (d, J = 7.7 Hz, 2H), 7.26 (d, J = 8.1 Hz, 2H), 6.62 (t, J = 56.7 Hz, 1H), 2.63 (t, J = 7.7 Hz, 2H), 1.68 – 1.58 (m, 2H), 1.42 -1.28 (m, 4H), 0.89 (t, J = 6.3 Hz, 3H). <sup>19</sup>F NMR (376 MHz, CDCl<sub>3</sub>) δ -109.67 (d, J = 56.9 Hz). <sup>13</sup>C NMR (101 MHz, CDCl<sub>3</sub>) δ 146.02 (t, J = 1.8 Hz), 131.89 (t, J = 22.0 Hz), 128.83 (s), 125.63 (t, J = 6.0 Hz), 115.11 (t, J = 238.1 Hz), 35.92 (s), 31.56 (s), 31.14 (s), 22.66 (s), 14.15 (s). HRMS EI (m/z): [M]<sup>+</sup> calcd. for C<sub>12</sub>H<sub>16</sub>F<sub>2</sub>: 198.1220 found: 198.1223.

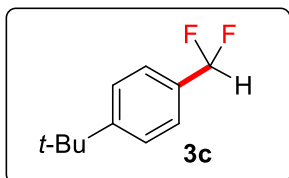

**1-(tert-butyl)-4-(difluoromethyl)benzene (3c):** dtbpy (5 mol%), PPh<sub>3</sub> (10 mol%) were used as ligands, the reaction was run for 24 h. **Note:** The product **3c** was isolated with silica gel chromatography (PE) to give a unseparated mixture with homo-coupling biarene as a colorless oil, the yield (89% yield) was

determined by the ratio of the mixture via  $^1\text{H}$  NMR analysis (9:1). This compound is known.<sup>6</sup>  $^1\text{H}$  NMR (400 MHz,  $\text{CDCl}_3$ )  $\delta$  7.48 (d,  $J$  = 8.6 Hz, 2H), 7.44 (d,  $J$  = 8.6 Hz, 2H), 6.63 (t,  $J$  = 56.6 Hz, 1H), 1.34 (s, 9H).  $^{19}\text{F}$  NMR (376 MHz,  $\text{CDCl}_3$ )  $\delta$  -109.85 (d,  $J$  = 56.8 Hz).  $^{13}\text{C}$  NMR (101 MHz,  $\text{CDCl}_3$ )  $\delta$  154.14 (t,  $J$  = 2.0 Hz), 131.67 (t,  $J$  = 23.5 Hz), 125.76 (s), 125.45 (t,  $J$  = 6.0 Hz), 115.04 (t,  $J$  = 238.5 Hz), 35.00 (s), 31.36 (s).

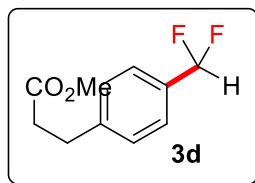

**Methyl 3-(4-(difluoromethyl)phenyl)propanoate (3d):** dtbpy (5 mol%),  $\text{PCy}_3$  (10 mol%) were used as ligands, the reaction was run for 24 h. The product **3d** was purified with silica gel chromatography (PE/EA = 20:1) as a colorless oil (76% yield).  $^1\text{H}$  NMR (400 MHz,  $\text{CDCl}_3$ )  $\delta$  7.43 (d,  $J$  = 6.0 Hz, 2H), 7.29 (d,  $J$  = 5.8 Hz, 2H), 6.62 (t,  $J$  = 56.6 Hz, 1H), 3.67 (s, 3H), 2.99 (t,  $J$  = 7.1 Hz, 2H), 2.65 (t,  $J$  = 7.6

Hz, 2H).  $^{19}\text{F}$  NMR (376 MHz,  $\text{CDCl}_3$ )  $\delta$  -110.08 (d,  $J$  = 58.5 Hz).  $^{13}\text{C}$  NMR (101 MHz,  $\text{CDCl}_3$ )  $\delta$  173.16 (s), 143.51 (s), 132.59 (t,  $J$  = 22.6 Hz), 128.75 (s), 125.90 (t,  $J$  = 6.0 Hz), 114.87 (t,  $J$  = 238.2 Hz), 51.83 (s), 35.46 (s), 30.80 (s). IR (neat,  $\text{cm}^{-1}$ ) 3011, 2940, 1734, 1595, 1519, 1497, 1479, 1450, 1382, 1356, 1334, 1313, 1245, 1223, 1210, 1177, 1160, 1147, 1120, 1107, 1060, 1018, 924, 841, 749, 698, 668, 639. HRMS EI ( $m/z$ ):  $[\text{M}]^+$  calcd. for  $\text{C}_{11}\text{H}_{12}\text{OF}_2$ : 214.0805 found: 214.0806.

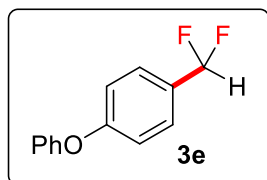

**1-(difluoromethyl)-4-phenoxybenzene (3e):** dtbpy (5 mol%),  $\text{PPh}_3$  (10 mol%) were used as ligands, the reaction was run for 24 h. The product **3e** was purified with silica gel chromatography (PE) as a colorless solid (69% yield). This compound is known.<sup>7</sup>  $^1\text{H}$  NMR (400 MHz,  $\text{CDCl}_3$ )  $\delta$  7.46 (d,  $J$  = 7.8 Hz, 2H), 7.37 (t,  $J$  = 7.1 Hz, 2H), 7.16 (t,  $J$  = 6.9 Hz, 1H), 7.04 (d,  $J$  = 7.6 Hz, 4H), 6.62 (t,  $J$  =

56.6 Hz, 1H).  $^{19}\text{F}$  NMR (376 MHz,  $\text{CDCl}_3$ )  $\delta$  -108.94 (d,  $J$  = 56.6 Hz).  $^{13}\text{C}$  NMR (101 MHz,  $\text{CDCl}_3$ )  $\delta$  159.73 (s), 156.30 (s), 130.11 (s), 129.01 (t,  $J$  = 22.8 Hz), 127.46 (t,  $J$  = 5.9 Hz), 124.26 (s), 119.77 (s), 118.38 (s), 114.74 (t,  $J$  = 238.0 Hz).

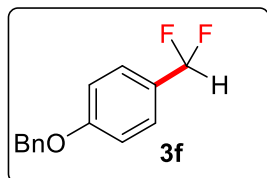

**1-(benzyloxy)-4-(difluoromethyl)benzene (3f):** dtbpy (5 mol%),  $\text{PPh}_3$  (10 mol%) were used as ligands, the reaction was run for 24 h. The product **3f** was purified with silica gel chromatography (PE) as a colorless solid (65% yield). This compound is known.<sup>6</sup>  $^1\text{H}$  NMR (400 MHz,  $\text{CDCl}_3$ )  $\delta$  7.34 (dd,  $J$  = 8.4, 4.8 Hz, 4H), 7.32 – 7.24 (m, 3H), 6.94 (d,  $J$  = 8.8 Hz, 2H), 6.51 (t,  $J$  = 56.7 Hz, 1H), 5.01

(s, 2H).  $^{19}\text{F}$  NMR (376 MHz,  $\text{CDCl}_3$ )  $\delta$  -108.32 (d,  $J$  = 56.8 Hz).  $^{13}\text{C}$  NMR (101 MHz,  $\text{CDCl}_3$ )  $\delta$  160.68 (s), 136.62 (s), 128.80 (s), 128.28 (s), 127.58 (s), 127.28 (t,  $J$  = 5.9 Hz), 127.17 (t,  $J$  = 22.7 Hz), 115.08 (s), 114.99 (t,  $J$  = 237.5 Hz), 70.24 (s).

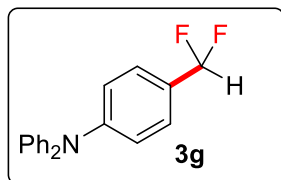

**4-(difluoromethyl)-N,N-diphenylaniline (3g):** dtbpy (5 mol%),  $\text{PPh}_3$  (10 mol%) were used as ligands, the reaction was run for 24 h.  $^{19}\text{F}$  NMR yield: 69% (using  $\text{PhOCF}_3$  as internal standard). **Note:** Compound **3g** is unstable upon purification with silica gel chromatography. HRMS ESI ( $m/z$ ):  $[\text{M}+\text{H}]^+$  calcd. for  $\text{C}_{19}\text{H}_{16}\text{F}_2\text{N}$ : 296.1245 found: 296.1249.

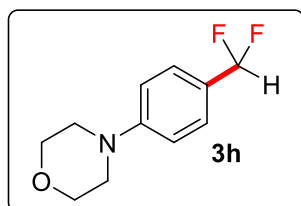

**4-(4-(difluoromethyl)phenyl)morpholine (3h):** dtbpy (5 mol%),  $\text{PPh}_3$  (10 mol%) were used as ligands, the reaction was run for 24 h. The product **3h** was purified with silica gel chromatography (PE/EA = 5:1) as a colorless solid (78% yield). This compound is known.<sup>7</sup>  $^1\text{H}$  NMR (400 MHz,  $\text{CDCl}_3$ )  $\delta$  7.40 (d,  $J$  = 8.3 Hz, 2H), 6.93 (d,  $J$  = 8.4 Hz, 2H), 6.58 (t,  $J$  = 56.9 Hz, 1H), 3.90 – 3.82 (m, 2H), 3.24 – 3.18 (m, 2H).  $^{19}\text{F}$  NMR (376 MHz,  $\text{CDCl}_3$ )  $\delta$  -108.05 (d,  $J$  = 56.9 Hz).  $^{13}\text{C}$  NMR (101 MHz,



CDCl<sub>3</sub>)  $\delta$  153.00 (s), 126.87 (t,  $J$  = 5.9 Hz), 125.39 (t,  $J$  = 22.8 Hz), 115.23 (t,  $J$  = 236.9 Hz), 114.94 (s), 66.85 (s), 48.65 (s).

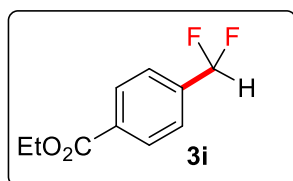

**Ethyl 4-(difluoromethyl)benzoate (3i):** dtbpy (5 mol%), PCy<sub>3</sub> (10 mol%) were used as ligands, the reaction was run for 24 h. The product **3i** was purified with silica gel chromatography (PE/EA = 10:1) as a colorless oil (86% yield). This compound is known.<sup>8</sup> <sup>1</sup>H NMR (400 MHz, CDCl<sub>3</sub>)  $\delta$  8.13 (d,  $J$  = 8.1 Hz, 2H), 7.58 (d,  $J$  = 8.1 Hz, 2H), 6.69 (t,  $J$  = 56.1 Hz, 1H), 4.40 (q,  $J$  = 7.1 Hz, 2H), 1.41 (t,  $J$  = 7.1 Hz, 3H). <sup>19</sup>F NMR (376 MHz, CDCl<sub>3</sub>)  $\delta$  -112.16 (d,  $J$  = 56.1 Hz). <sup>13</sup>C NMR (101 MHz, CDCl<sub>3</sub>)  $\delta$  165.91 (s), 138.47 (t,  $J$  = 22.4 Hz), 132.80 (t,  $J$  = 1.8 Hz), 130.04 (s), 125.72 (t,  $J$  = 6.0 Hz), 114.17 (t,  $J$  = 239.7 Hz), 61.49 (s), 14.40 (s).

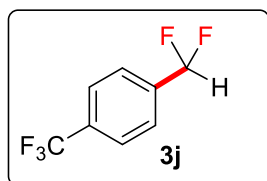

**1-(difluoromethyl)-4-(trifluoromethyl)benzene (3j):** dtbpy (5 mol%), PCy<sub>3</sub> (10 mol%) were used as ligands, the reaction was run for 24 h. This compound is known.<sup>8</sup> Due to the low boiling point of the product, the yield (52%) was determined by <sup>19</sup>F NMR using PhOCF<sub>3</sub> as an internal standard. This compound is known<sup>8</sup>. The product was characterized by <sup>19</sup>F NMR and GC-MS analysis.

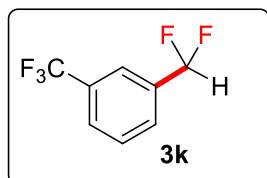

**1-(difluoromethyl)-3-(trifluoromethyl)benzene (3k):** dtbpy (5 mol%), PCy<sub>3</sub> (10 mol%) were used as ligands, the reaction was run for 24 h. This compound is known.<sup>7</sup> Due to the low boiling point of the product, the yield (62%) was determined by <sup>19</sup>F NMR using PhOCF<sub>3</sub> as an internal standard. This compound is known<sup>7</sup>. The product was characterized by <sup>19</sup>F NMR and GC-MS analysis.

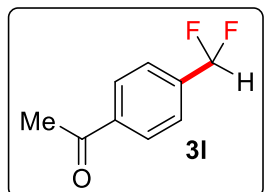

**1-(4-(difluoromethyl)phenyl)ethan-1-one (3l):** dtbpy (5 mol%), PCy<sub>3</sub> (10 mol%) were used as ligands, the reaction was run for 48 h. Due to the low boiling point of the product, the yield (67%) was determined by <sup>19</sup>F NMR using PhOCF<sub>3</sub> as an internal standard and the product **3l** was purified with silica gel chromatography (PE/EA = 10:1) as a colorless oil (49% yield). This compound is known.<sup>7</sup> <sup>1</sup>H NMR (400 MHz, CDCl<sub>3</sub>)  $\delta$  7.88 (d,  $J$  = 8.0 Hz, 2H), 7.81 (d,  $J$  = 7.7 Hz, 2H), 7.64 (d,  $J$  = 8.2 Hz, 2H), 7.61 (d,  $J$  = 8.0 Hz, 1H), 7.50 (t,  $J$  = 7.7 Hz, 2H), 6.73 (t,  $J$  = 56.1 Hz, 1H). <sup>19</sup>F NMR (376 MHz, CDCl<sub>3</sub>)  $\delta$  -112.29 (d,  $J$  = 56.1 Hz). <sup>13</sup>C NMR (101 MHz, CDCl<sub>3</sub>)  $\delta$  197.53 (s), 138.99 (t,  $J$  = 1.7 Hz), 138.64 (t,  $J$  = 22.5 Hz), 128.78 (s), 126.04 (t,  $J$  = 6.0 Hz), 114.08 (t,  $J$  = 239.8 Hz), 26.92 (s).

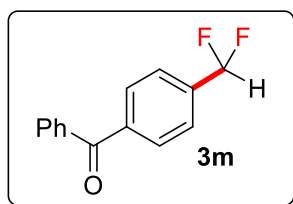

**(4-(difluoromethyl)phenyl)(phenyl)**

**methanone (3m):** dtbpy (5 mol%), PCy<sub>3</sub> (10 mol%) were used as ligands, the reaction was run for 48 h. The product **3m** was purified with silica gel chromatography (PE/EA = 10:1) as a colorless solid (80% yield). This compound is known.<sup>9</sup> <sup>1</sup>H NMR (400 MHz, CDCl<sub>3</sub>)  $\delta$  7.88 (d,  $J$  = 8.0 Hz, 2H), 7.81 (d,  $J$  = 7.7 Hz, 2H), 7.66 – 7.62 (m, 2H), 7.60 (s, 1H), 7.50 (t,  $J$  = 7.7 Hz, 2H), 6.73 (t,  $J$  = 56.1 Hz, 1H). <sup>19</sup>F NMR (376 MHz, CDCl<sub>3</sub>)  $\delta$  -112.00 (d,  $J$  = 56.1 Hz). <sup>13</sup>C NMR (101 MHz, CDCl<sub>3</sub>)  $\delta$  196.07 (s), 139.85 (t,  $J$  = 1.8 Hz), 137.93 (t,  $J$  = 22.4 Hz), 137.14 (s), 133.03 (s), 130.37 (s), 130.23 (s), 128.59 (s), 125.72 (t,  $J$  = 6.0 Hz), 114.18 (t,  $J$  = 239.7 Hz).

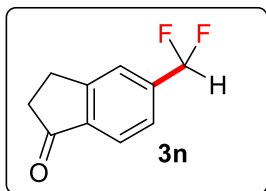

**5-(difluoromethyl)-2,3-dihydro-1H-inden-1-one (3n):** dtbpy (5 mol%), PCy<sub>3</sub> (10 mol%) were used as ligands, the reaction was run for 24 h. The product **3n** was purified with silica gel chromatography (PE/EA = 8:1) as a colorless solid (51% yield). <sup>1</sup>H NMR (400 MHz, CDCl<sub>3</sub>) δ 7.84 (d, J = 7.9 Hz, 1H), 7.65 (s, 1H), 7.51 (d, J = 7.9 Hz, 1H), 6.71 (t, J = 56.1 Hz, 1H), 3.23 – 3.18 (m, 2H), 2.79 – 2.73 (m, 2H). <sup>19</sup>F NMR (376 MHz, CDCl<sub>3</sub>) δ -111.82 (d, J = 56.1 Hz). <sup>13</sup>C NMR (101 MHz, CDCl<sub>3</sub>) δ 206.35 (s), 155.46 (s), 140.24 (t, J = 22.0 Hz), 139.05 (t, J = 1.6 Hz), 124.98 (t, J = 5.9 Hz), 124.35 (s), 124.15 (t, J = 6.2 Hz), 114.18 (t, J = 240.2 Hz), 36.53 (s), 25.96 (s). IR (neat, cm<sup>-1</sup>) 3006, 2939, 2359, 1705, 1615, 1486, 1450, 1431, 1406, 1383, 1322, 1297, 1274, 1192, 1142, 1062, 1020, 965, 934, 898, 843, 778, 760, 710, 685. HRMS EI (m/z): [M]<sup>+</sup> calcd. for C<sub>10</sub>H<sub>8</sub>OF<sub>2</sub>: 182.0543 found: 182.0535.

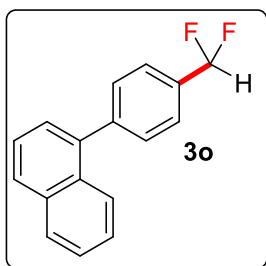

**1-(4-(difluoromethyl)phenyl)naphthalene (3o):** dtbpy (5 mol%), P(4-OMePh)<sub>3</sub> (10 mol%) were used as ligands, the reaction was run for 24 h. The product **3o** was purified with silica gel chromatography (PE/EA = 50:1) as a colorless solid. (74% yield). <sup>1</sup>H NMR (400 MHz, CDCl<sub>3</sub>) δ 7.90 (dd, J = 12.0, 8.2 Hz, 2H), 7.83 (d, J = 8.4 Hz, 1H), 7.64 (d, J = 8.0 Hz, 2H), 7.58 (d, J = 8.1 Hz, 2H), 7.55-7.52 (m, 1H), 7.51-7.48 (m, 1H), 7.47-7.39 (m, 2H), 6.75 (t, J = 56.5 Hz, 1H). <sup>19</sup>F NMR (376 MHz, CDCl<sub>3</sub>) δ -110.21 (d, J = 56.6 Hz). <sup>13</sup>C NMR (101 MHz, CDCl<sub>3</sub>) δ 143.51 (t, J = 2.0 Hz), 139.28 (s), 133.90 (s), 133.41 (t, J = 22.4 Hz), 131.49 (s), 130.52 (s), 128.52 (s), 128.29 (s), 127.12 (s), 126.45 (s), 126.09 (s), 125.79 (s), 125.69 (t, J = 6.0 Hz), 125.49 (s), 114.94 (t, J = 238.6 Hz). IR (neat, cm<sup>-1</sup>) 3043, 2939, 2360, 1927, 1615, 1505, 1493, 1460, 1396, 1377, 1218, 1181, 1143, 1070, 1017, 964, 840, 798, 791, 775, 718, 734, 697, 626. HRMS EI (m/z): [M]<sup>+</sup> calcd. for C<sub>17</sub>H<sub>12</sub>F<sub>2</sub>: 254.0907 found: 254.0911

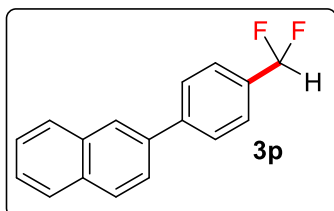

**2-(4-(difluoromethyl)phenyl)naphthalene (3p):** dtbpy (5 mol%), PPh<sub>3</sub> (10 mol%) were used as ligands, the reaction was run for 24 h. The product **3p** was purified with silica gel chromatography (PE) as a colorless solid (55% yield). <sup>1</sup>H NMR (400 MHz, CDCl<sub>3</sub>) δ 8.04 (s, 1H), 7.95 – 7.85 (m, 3H), 7.78 (d, J = 8.0 Hz, 2H), 7.72 (dd, J = 8.5, 1.6 Hz, 1H), 7.61 (d, J = 8.0 Hz, 2H), 7.55 – 7.46 (m, 2H), 6.71 (t, J = 56.5 Hz, 1H). <sup>19</sup>F NMR (376 MHz, CDCl<sub>3</sub>) δ -110.28 (d, J = 56.5 Hz). <sup>13</sup>C NMR (101 MHz, CDCl<sub>3</sub>) δ 143.72 (t, J = 2.0 Hz), 137.58 (s), 133.71 (s), 133.37 (t, J = 22.5 Hz), 132.98 (s), 128.79 (s), 128.41 (s), 127.81 (s), 126.64 (s), 126.45 (s), 126.31 (s), 126.25 (t, J = 6.1 Hz), 125.44 (s), 114.89 (t, J = 238.5 Hz). IR (neat, cm<sup>-1</sup>) 3395, 2964, 2927, 2358, 1504, 1443, 1373, 1361, 1233, 1192, 1155, 1086, 1047, 880, 795, 768, 694, 677, 651, 637. HRMS EI (m/z): [M]<sup>+</sup> calcd. for C<sub>17</sub>H<sub>12</sub>F<sub>2</sub>: 254.0907 found: 254.0905.

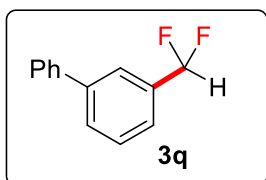

**3-(difluoromethyl)-1,1'-biphenyl (3q):** phen (5 mol%), dppe (5 mol%) were used as ligands, the reaction was run for 24 h. The product **3q** was purified with silica gel chromatography (PE) as a colorless oil (65% yield). This compound is known.<sup>7</sup> <sup>1</sup>H NMR (400 MHz, CDCl<sub>3</sub>) δ 7.72 (s, 1H), 7.69 (d, J = 7.5 Hz, 1H), 7.62 – 7.57 (m, 2H), 7.56- 7.42 (m, 4H), 7.38 (t, J = 7.3 Hz, 1H), 6.70 (t, J = 56.5 Hz, 1H). <sup>19</sup>F NMR (376 MHz, CDCl<sub>3</sub>) δ -110.56 (d, J = 56.5 Hz). <sup>13</sup>C NMR (101 MHz, CDCl<sub>3</sub>) δ 141.99 (s), 140.32 (s), 135.04 (t, J = 22.3 Hz), 129.58 (t, J = 1.9 Hz), 129.32 (s), 129.06 (s), 127.94 (s), 127.32 (s), 124.46 (td, J = 6.0, 4.6 Hz), 114.90 (t, J = 239.0 Hz).

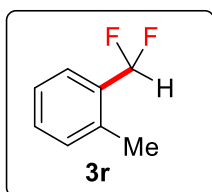

**1-(difluoromethyl)-2-methylbenzene (3r):** dtbpy (5 mol%), dppe (5 mol%) were used as ligands, the reaction was run for 48 h. This compound is known.<sup>10</sup> Due to the low boiling point of the product, the yield (76%) was determined by <sup>19</sup>F NMR using PhOCF<sub>3</sub> as an internal standard. This compound is known. The product was characterized by <sup>19</sup>F NMR and GC-MS analysis.

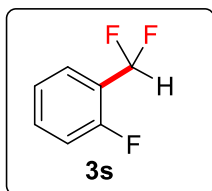

**1-(difluoromethyl)-2-fluorobenzene (3s):** dtbpy (5 mol%), dppe (5 mol%) were used as ligands, the reaction was run for 48 h. This compound is known.<sup>11</sup> Due to the low boiling point of the product, the yield (67%) was determined by <sup>19</sup>F NMR using PhOCF<sub>3</sub> as an internal standard. This compound is known. The product was characterized by <sup>19</sup>F NMR and GC-MS analysis.

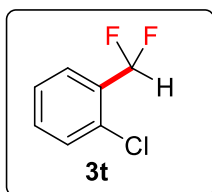

**1-chloro-2-(difluoromethyl)benzene (3t):** dtbpy (5 mol%), dppe (5 mol%) were used as ligands, the reaction was run for 48 h. This compound is known.<sup>12</sup> Due to the low boiling point of the product, the yield (62%) was determined by <sup>19</sup>F NMR using PhOCF<sub>3</sub> as an internal standard. This compound is known. The product was characterized by <sup>19</sup>F NMR and GC-MS analysis.

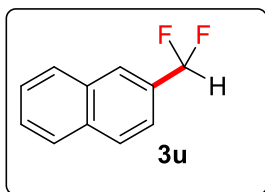

**2-(difluoromethyl)naphthalene (3u):** dtbpy (5 mol%), PPh<sub>3</sub> (10 mol%) were used as ligands, the reaction was run for 24 h. The product **3u** was purified with silica gel chromatography (PE/EA = 30:1) as a colorless solid (51% yield). This compound is known.<sup>7</sup> <sup>1</sup>H NMR (400 MHz, CDCl<sub>3</sub>) δ 7.97 (s, 1H), 7.95 – 7.86 (m, 3H), 7.62 – 7.52 (m, 3H), 6.80 (t, J = 56.4 Hz, 1H). <sup>19</sup>F NMR (376 MHz, CDCl<sub>3</sub>)

δ -109.82 (d, J = 56.4 Hz). <sup>13</sup>C NMR (101 MHz, CDCl<sub>3</sub>) δ 134.44 (s), 132.68 (s), 131.74 (t, J = 22.5 Hz), 129.03 (s), 128.66 (s), 128.02 (s), 127.54 (s), 126.95 (s), 126.03 (t, J = 7.1 Hz), 122.16 (t, J = 4.7 Hz), 115.18 (t, J = 238.9 Hz).

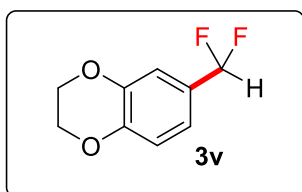

**6-(difluoromethyl)-2,3-dihydrobenzo[b][1,4]dioxine (3v):** dtbpy (5 mol%), PCy<sub>3</sub> (10 mol%) were used as ligands, the reaction was run for 24 h. The product **3v** was purified with silica gel chromatography (PE) as a colorless oil (68% yield). <sup>1</sup>H NMR (400 MHz, CDCl<sub>3</sub>) δ 7.03 (s, 1H), 6.98 (d, J = 8.7 Hz, 1H), 6.92 (d, J = 8.4 Hz, 1H), 6.54 (t, J = 56.7 Hz, 1H), 4.28 (s, 4H). <sup>19</sup>F NMR

(376 MHz, CDCl<sub>3</sub>) δ -108.63 (d, J = 56.7 Hz). <sup>13</sup>C NMR (101 MHz, CDCl<sub>3</sub>) δ 145.65 (t, J = 1.8 Hz), 143.75 (s), 127.82 (t, J = 22.8 Hz), 118.93 (t, J = 6.2 Hz), 117.69 (s), 115.01 (t, J = 6.1 Hz), 114.66 (t, J = 238.0 Hz), 64.55 (s), 64.40 (s). IR (neat, cm<sup>-1</sup>) 3424, 3010, 2919, 2850, 2359, 1592, 1494, 1450, 1391, 1353, 1334, 1246, 1226, 1210, 1178, 1160, 1145, 1062, 1029, 924, 838, 805, 748, 720, 697, 667, 615, 639. HRMS EI (m/z): [M]<sup>+</sup> calcd. for C<sub>9</sub>H<sub>8</sub>O<sub>2</sub>F<sub>2</sub>: 186.0492 found: 186.0500.

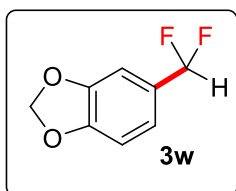

**5-(difluoromethyl)benzo[d][1,3]dioxole (3w):** dtbpy (5 mol%), PCy<sub>3</sub> (10 mol%) were used as ligands, the reaction was run for 24 h. The product **3w** was purified with silica gel chromatography (PE) as a colorless oil (62% yield). This compound is known.<sup>7</sup> <sup>1</sup>H NMR (400 MHz, CDCl<sub>3</sub>) δ 6.98 (d, J = 7.8 Hz, 1H), 6.85 (d, J = 7.7 Hz, 1H), 6.54 (t, J = 56.6 Hz, 1H), 6.02 (s, 1H). <sup>19</sup>F NMR (376 MHz, CDCl<sub>3</sub>) δ -

107.89 (d, J = 56.6 Hz). <sup>13</sup>C NMR (101 MHz, CDCl<sub>3</sub>) δ 149.69 (t, J = 2.0 Hz), 148.18 (s), 128.43 (t, J = 22.7 Hz), 120.28 (t, J = 7.2 Hz), 114.76 (t, J = 238.1 Hz), 108.36 (s), 105.92 (t, J = 5.5 Hz), 101.71 (s).

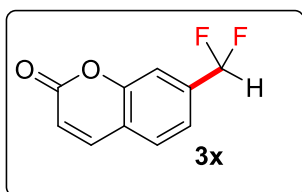

**7-(difluoromethyl)-2H-chromen-2-one (3x):** dtbpy (5 mol%), dppe (5 mol%) were used as ligands, the reaction was run for 24 h. The product **3x** was purified with silica gel chromatography (PE/EA = 20:1) as a colorless oil (53% yield). <sup>1</sup>H NMR (400 MHz, CDCl<sub>3</sub>) δ 7.75 (d, J = 9.6 Hz, 1H), 7.60 (d, J = 7.9 Hz, 1H), 7.47 (s, 1H), 7.44 (d, J = 8.0 Hz, 1H), 6.72 (t, J = 56.0 Hz, 1H), 6.52 (d, J = 9.6 Hz, 1H). <sup>19</sup>F NMR (376 MHz, CDCl<sub>3</sub>) δ -112.06 (d, J = 56.0 Hz). <sup>13</sup>C NMR (101 MHz, CDCl<sub>3</sub>) δ 160.16 (s), 154.02 (s), 142.72 (s), 137.86 (t, J = 20.1 Hz), 128.63 (s), 121.50 (t, J = 5.9 Hz), 120.61 (s), 118.38 (s), 114.59 (t, J = 6.6 Hz), 113.55 (t, J = 240.6 Hz). IR (neat, cm<sup>-1</sup>) 3417, 3318, 2991, 2931, 2852, 2360, 1596, 1494, 1458, 1395, 1382, 1315, 1278, 1248, 1210, 1160, 1144, 1043, 991, 908, 924, 873, 850, 781, 749, 697, 668, 619. HRMS EI (m/z): [M]<sup>+</sup> calcd. for C<sub>14</sub>H<sub>12</sub>F<sub>2</sub>: 218.0907 found: 218.0914.

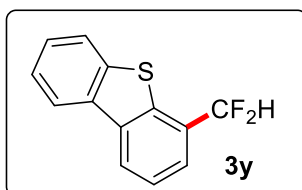

**4-(difluoromethyl)dibenzo[b,d]thiophene (3y):** dtbpy (5 mol%), P(4-OMePh)<sub>3</sub> (10 mol%) were used as ligands, the reaction was run for 24 h. The product **3y** was purified with silica gel chromatography (PE) as a colorless solid (51% yield). This compound is known.<sup>7</sup> <sup>1</sup>H NMR (400 MHz, CDCl<sub>3</sub>) δ 8.24 (dd, J = 7.9, 1.0 Hz, 1H), 8.20 – 8.14 (m, 1H), 7.91 – 7.85 (m, 1H), 7.61 (dd, J = 7.4, 0.7 Hz, 1H), 7.53 (d, J = 7.7 Hz, 1H), 7.51 – 7.46 (m, 2H), 6.93 (t, J = 55.6 Hz, 1H). <sup>19</sup>F NMR (376 MHz, CDCl<sub>3</sub>) δ -113.35 (d, J = 55.6 Hz). <sup>13</sup>C NMR (101 MHz, CDCl<sub>3</sub>) δ 139.62 (s), 137.14 (s), 136.78 (t, J = 3.2 Hz), 134.77 (s), 128.67 (t, J = 22.9 Hz), 127.50 (s), 124.83 (s), 124.53 (s), 124.46 (t, J = 7.1 Hz), 123.89 (s), 122.85 (s), 121.83 (s), 114.60 (t, J = 239.6 Hz).

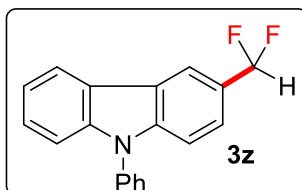

**3-(difluoromethyl)-9-phenyl-9H-carbazole (3z):** dtbpy (5 mol%), dppe (5 mol%) were used as ligands, the reaction was run for 24 h. The product **3z** was purified with silica gel chromatography (PE/EA = 50:1) as a colorless solid (73 % yield). This compound is known.<sup>7</sup> <sup>1</sup>H NMR (400 MHz, CDCl<sub>3</sub>) δ 8.21 (d, J = 0.5 Hz, 1H), 8.12 – 8.04 (m, 1H), 7.56 – 7.49 (m, 2H), 7.48 – 7.43 (m, 3H), 7.43 – 7.39 (m, 1H), 7.37 – 7.30 (m, 3H), 7.24 (ddd, J = 8.0, 6.8, 1.4 Hz, 1H), 6.76 (t, J = 56.9 Hz, 1H). <sup>19</sup>F NMR (376 MHz, CDCl<sub>3</sub>) δ -106.25 (d, J = 56.9 Hz). <sup>13</sup>C NMR (101 MHz, CDCl<sub>3</sub>) δ 142.20 (s), 141.65 (s), 137.35 (s), 130.16 (s), 128.05 (s), 127.29 (s), 126.75 (s), 126.29 (t, J = 22.5 Hz), 123.38 (t, J = 6.1 Hz), 123.33 (s), 123.13 (s), 120.63 (s), 120.62 (s), 118.27 (t, J = 6.5 Hz), 115.88 (t, J = 234.7 Hz), 110.23 (s), 110.13 (s).

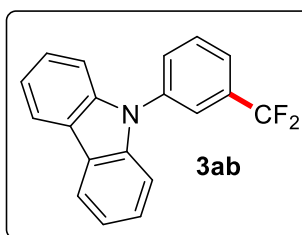

**9-(3-(difluoromethyl)phenyl)-9H-carbazole(3ab):** dtbpy (5 mol%), PCy<sub>3</sub> (10 mol%) were used as ligands, the reaction was run for 48 h. The product **3ab** was purified with silica gel chromatography (PE) as a colorless solid (81 % yield). <sup>1</sup>H NMR (400 MHz, CDCl<sub>3</sub>) δ 8.14 (d, J = 7.5 Hz, 2H), 7.73 (s, 1H), 7.69 (d, J = 5.0 Hz, 2H), 7.60 (t, J = 4.2 Hz, 1H), 7.45 – 7.35 (m, 4H), 7.35 – 7.26 (m, 2H), 6.73 (t, J = 56.2 Hz, 1H). <sup>19</sup>F NMR (376 MHz, CDCl<sub>3</sub>) δ -111.02 (d, J = 56.3 Hz). <sup>13</sup>C NMR (101 MHz, CDCl<sub>3</sub>) δ 140.73 (s), 138.45 (s), 136.50 (t, J = 22.7 Hz), 130.59 (s), 129.43 (t, J = 1.7 Hz), 126.27 (s), 124.62 (t, J = 6.0 Hz), 124.34 (t, J = 6.1 Hz), 123.67 (s), 114.22 (t, J = 239.7 Hz), 109.67 (s). IR (neat, cm<sup>-1</sup>) 3042, 2939, 2359, 1594, 1496, 1478, 1457, 1448, 1389, 1366, 1334, 1313, 1245, 1226, 1210, 1178, 1160, 1146, 1120, 1058, 1019, 924, 907, 864, 794, 748, 720, 698, 668, 615. HRMS EI (m/z): [M]<sup>+</sup> calcd. for C<sub>19</sub>H<sub>13</sub>NF<sub>2</sub>: 293.1016 found: 293.1013.

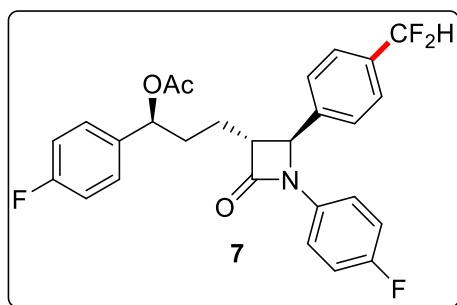

**(S)-3-(2S,3R-2-(4-(difluoromethyl)phenyl)-1-(4-fluorophenyl)-4-oxoazetidin-3-yl)-1-(4-fluorophenyl)propyl acetate(7):** dtbpy (5 mol%), PPh<sub>3</sub> (10 mol%) were used as ligands, the reaction was run for 24 h. The product **7** was purified with silica gel chromatography (PE/EA = 5:1) as a colorless solid (81% yield). <sup>1</sup>H NMR (400 MHz, CDCl<sub>3</sub>) δ 7.53 (d, J = 8.0 Hz, 2H), 7.41 (d, J = 8.0 Hz, 2H), 7.31 – 7.24 (m, 2H), 7.23 – 7.17 (m, 2H), 7.02 (t, J = 8.6 Hz, 2H), 6.93 (t, J = 8.6 Hz, 2H), 6.64 (t, J = 56.3 Hz, 1H), 5.70 (t, J = 6.7 Hz, 1H), 4.65 (d, J = 2.0 Hz, 1H), 3.07 (td, J = 7.7, 2.1 Hz, 1H), 2.09 – 1.99 (m, 5H), 1.94 – 1.83 (m, 2H). <sup>19</sup>F NMR (376 MHz, CDCl<sub>3</sub>) δ -110.89 (d, J = 56.6 Hz), -113.68 (ddd, J = 18.2, 9.0, 5.5 Hz), -117.56 (ddd, J = 13.5, 8.7, 4.8 Hz). <sup>13</sup>C NMR (101 MHz, CDCl<sub>3</sub>) δ 170.33 (s), 166.60 (s), 162.57 (d, J = 246.8 Hz), 159.21 (d, J = 243.8 Hz), 140.45 (s), 135.74 (d, J = 3.2 Hz), 134.98 (t, J = 22.6 Hz), 133.68 (d, J = 2.7 Hz), 128.39 (s), 128.31 (s), 126.80 (t, J = 6.0 Hz), 126.27 (s), 118.40 (d, J = 7.9 Hz), 116.09 (d, J = 22.7 Hz), 115.68 (d, J = 21.6 Hz), 114.31 (t, J = 239.1 Hz), 74.91 (s), 60.84 (s), 60.33 (s), 33.72 (s), 25.04 (s), 21.30 (s). IR (neat, cm<sup>-1</sup>) 3426, 3012, 2937, 2360, 1742, 1595, 1509, 1496, 1479, 1457, 1448, 1388, 1354, 1334, 1312, 1244, 1159, 1146, 1120, 1017, 924, 907, 834, 795, 748, 720, 697, 668, 639. HRMS ESI (m/z): [M+Na]<sup>+</sup> calcd. for C<sub>27</sub>H<sub>23</sub>O<sub>3</sub>NF<sub>4</sub>Na: 508.1512 found: 508.1516.

## Mechanistic Studies:

### 1. Radical Trapping Experiment with TEMPO

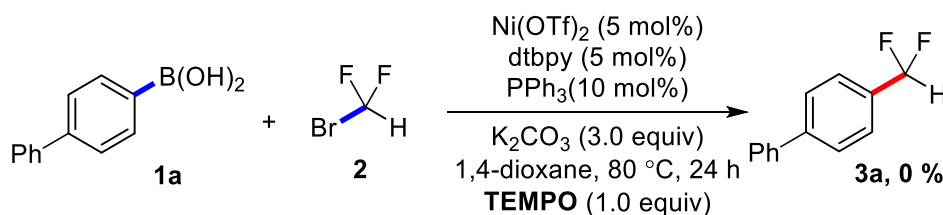

To a 5 mL sealed tube were added **1a** (2.0 equiv, 0.4 mmol), Ni(OTf)<sub>2</sub> (5 mol %, 0.01 mmol), dtbpy (5 mol %, 0.01 mmol), PPh<sub>3</sub> (10 mol%, 0.02 mol) and K<sub>2</sub>CO<sub>3</sub> (3.0 equiv, 0.6 mmol) under air. The vessel was evacuated and backfilled with N<sub>2</sub> (3 times) and 1,4-dioxane (2.0 mL) were added via syringe, then **2** (1.0 equiv, 0.2 mmol) and TEMPO (1.0 equiv, 0.2 mmol) were added. The reaction mixture was heated in a preheated oil bath at 80 °C for 24 h, and was cooled to room temperature. No product **3a** was detected by crude <sup>19</sup>F NMR.

### 2. Radical Clock Experiment:

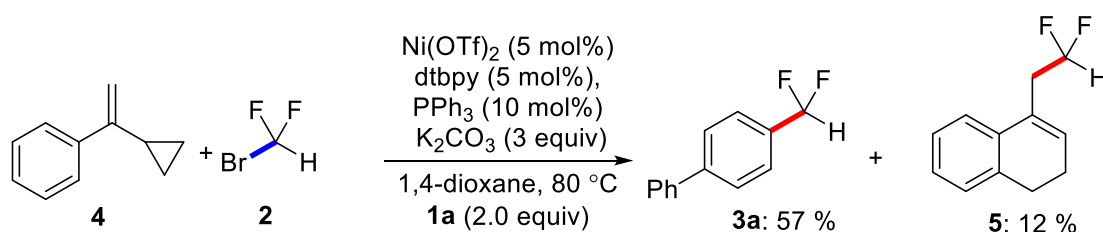

To a 5 mL sealed tube were added **1a** (2.0 equiv, 0.4 mmol), Ni(OTf)<sub>2</sub> (5 mol %, 0.01 mmol), dtbpy (5 mol %, 0.01 mmol), PPh<sub>3</sub> (10 mol%, 0.02 mol) and K<sub>2</sub>CO<sub>3</sub> (3.0 equiv, 0.6 mmol) under air. The vessel was evacuated and backfilled with N<sub>2</sub> (3 times) and 1,4-dioxane (2.0 mL) was added via syringe, then **2a** (1.0 equiv, 0.2 mmol) and **4** (2.0 equiv, 0.4 mmol) were added. The tube was screw capped and put into



a preheated oil bath at 80 °C for 24 h. After cooling to room temperature, the reaction mixture was diluted with EtOAc and filtered through a pad of celite. The filtrate was concentrated under vacuum and purified by flash column chromatography (PE) to give product **3a** in 57% yield and the yield of product **5** was determined by crude  $^{19}\text{F}$  NMR. **Note:** The product **5** was isolated with silica gel chromatography (PE) to give a unseparated mixture with **3a** as a colorless solid, the yield (12% yield) was determined by the ratio of the mixture via  $^{19}\text{F}$  NMR analysis  $^{19}\text{F}$  NMR (376 MHz,  $\text{CDCl}_3$ )  $\delta$  -113.93 (dt,  $J$  = 56.8, 16.5 Hz). HRMS EI ( $m/z$ ):  $[\text{M}]^+$  calcd. for  $\text{C}_{12}\text{H}_{12}\text{F}_2$ : 194.0907 found: 194.0914.

### 3. Procedure of Monofluoroalkylation with $\text{Ni}^0$ used as the catalyst

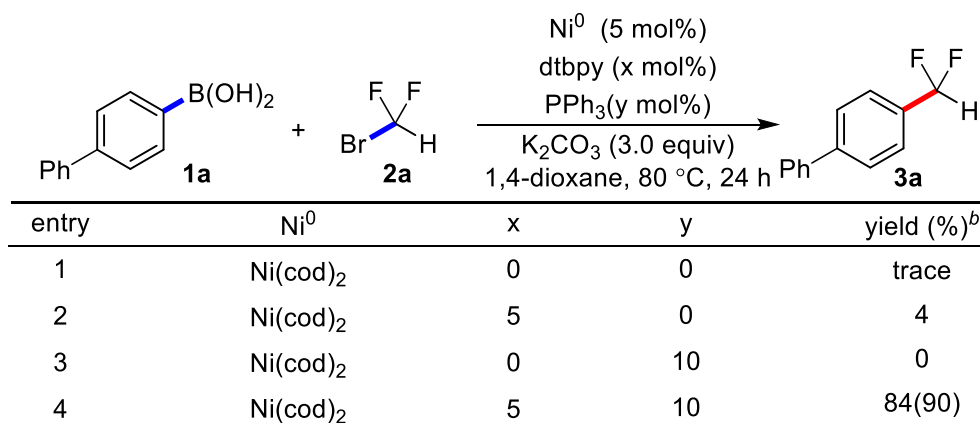

<sup>a</sup> Unless otherwise noted, the reaction conditions were as follows: **1a** (2.0 equiv), **2a** (0.2 mmol, 1.0 equiv),  $\text{Ni}^0$  (5 mol%), bpy (x mol%),  $\text{PPh}_3$  (y mol%),  $\text{K}_2\text{CO}_3$  (3.0 equiv), 1,4-dioxane (2 mL), 80 °C, 24 h,  $\text{N}_2$ , 5 mL sealed tube. <sup>b</sup> Yields determined by  $^{19}\text{F}$  NMR using  $\text{PhOCF}_3$  as an internal standard; number in parentheses was isolated yields

## References:

- 1 A. Hooper, A. Zambon and C. J. Springer, *Org. Biomol. Chem.*, **2016**, *14*, 963.
- 2 J. Zielonka, A. Sikora, J. Joseph and B. Kalyanaraman, *J. Biol. Chem.* **2010**, *285*, 14210.
- 3 (a) Y.-M. Su, G.-S. Feng, Z.-Y. Wang, Q. Lan and X.-S. Wang, *Angew. Chem. Int. Ed.* **2015**, *54*, 6003. (b) P. Tang, T. Furuya and T. Ritter, *J. Am. Chem. Soc.* **2010**, *132*, 12150.
- 4 T. W. Liwosz and S. R. Chemler, *Chem. Eur. J.* **2013**, *19*, 12771.
- 5 (a) Y. Ye and M. S. Sanford, *J. Am. Chem. Soc.*, **2012**, *134*, 9034. (b) Y. Wu, H.-R. Zhang, R.-X. Jin, Q. Lan and X.-S Wang, *Adv. Synth. Catal.* **2016**, *358*, 3528.
- 6 P. S. Fier and J. F. Hartwig, *J. Am. Chem. Soc.* **2012**, *134*, 5524.
- 7 Z. Feng, Q.-Q. Min and X. Zhang, *Org. Lett.* **2016**, *18*, 44.
- 8 S. Ge, W. Chaładaj and J. F. Hartwig, *J. Am. Chem. Soc.* **2014**, *136*, 4149.
- 9 G. K. S. Rakash, S. K. Ganesh, J.-P. Jones, A. Kulkarni, K. Masood, J. K. Swabeck and G. A. Olah, *Angew. Chem. Int. Ed.* **2012**, *51*, 12090.
- 10 Y. Gu, D. Chang, X. Leng, Y. Gu and Q. Shen, *Organometallics* **2015**, *34*, 3065.
- 11 X. Li, J. Zhao, M. Hu, D. Chen, C. Ni, L. Wang, J. Hu, *Chem. Commun.*, **2016**, *52*, 3657.

# NMR Spectra of New Compounds ( $^1\text{H}$ NMR, $^{19}\text{F}$ NMR, $^{13}\text{C}$ NMR).

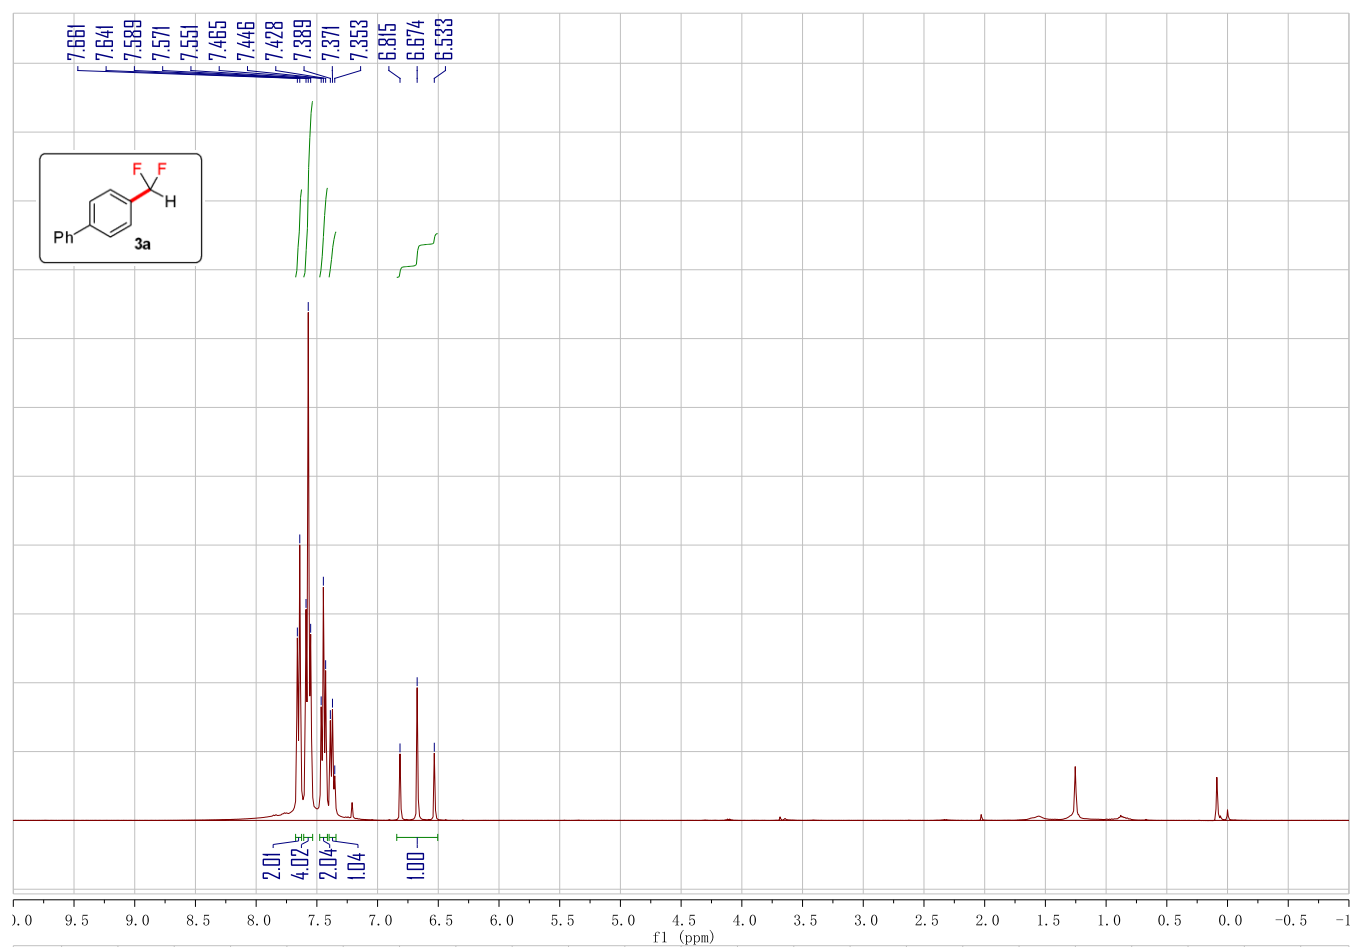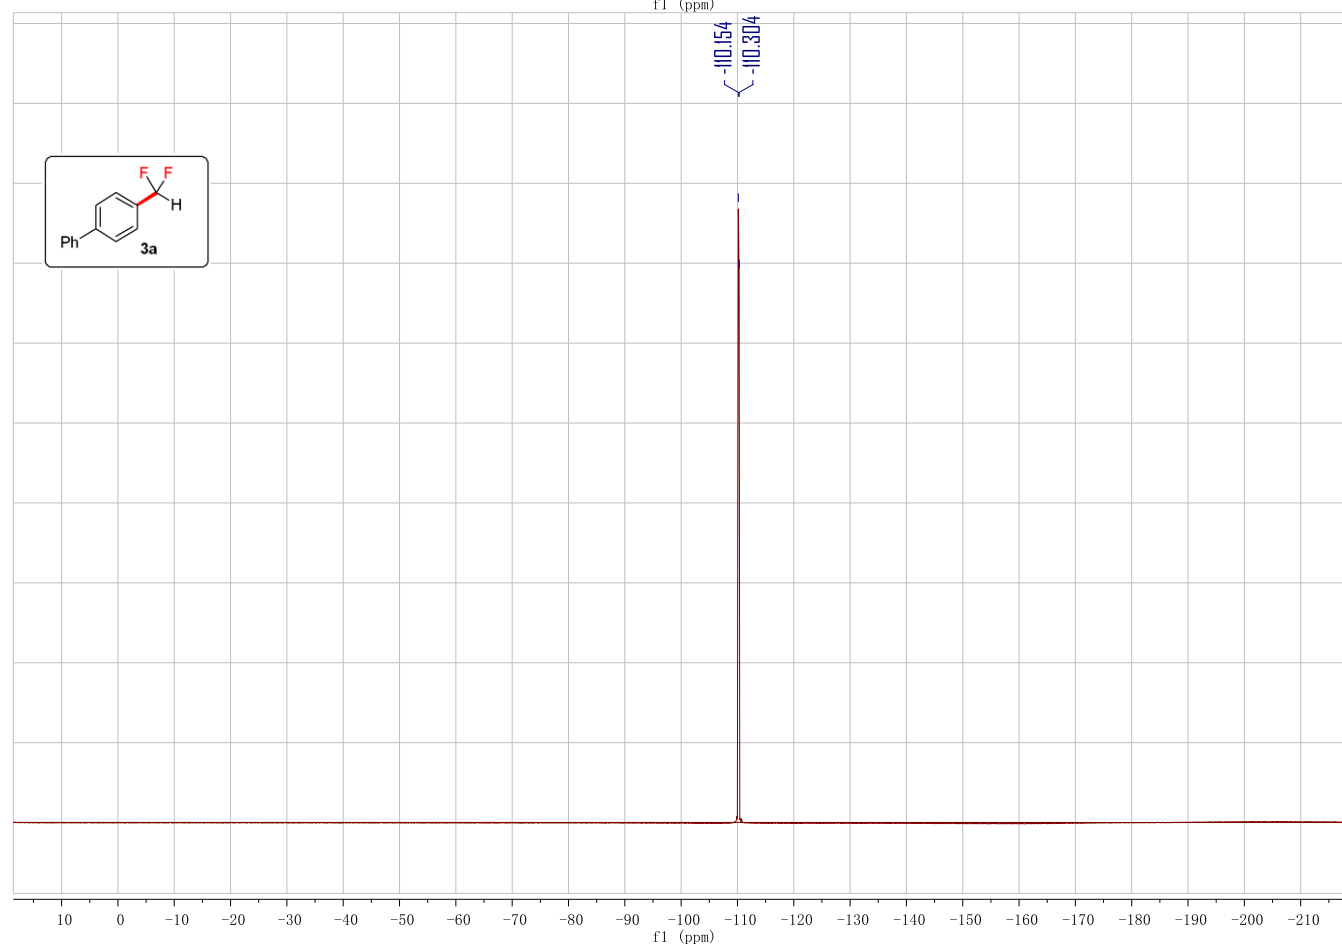

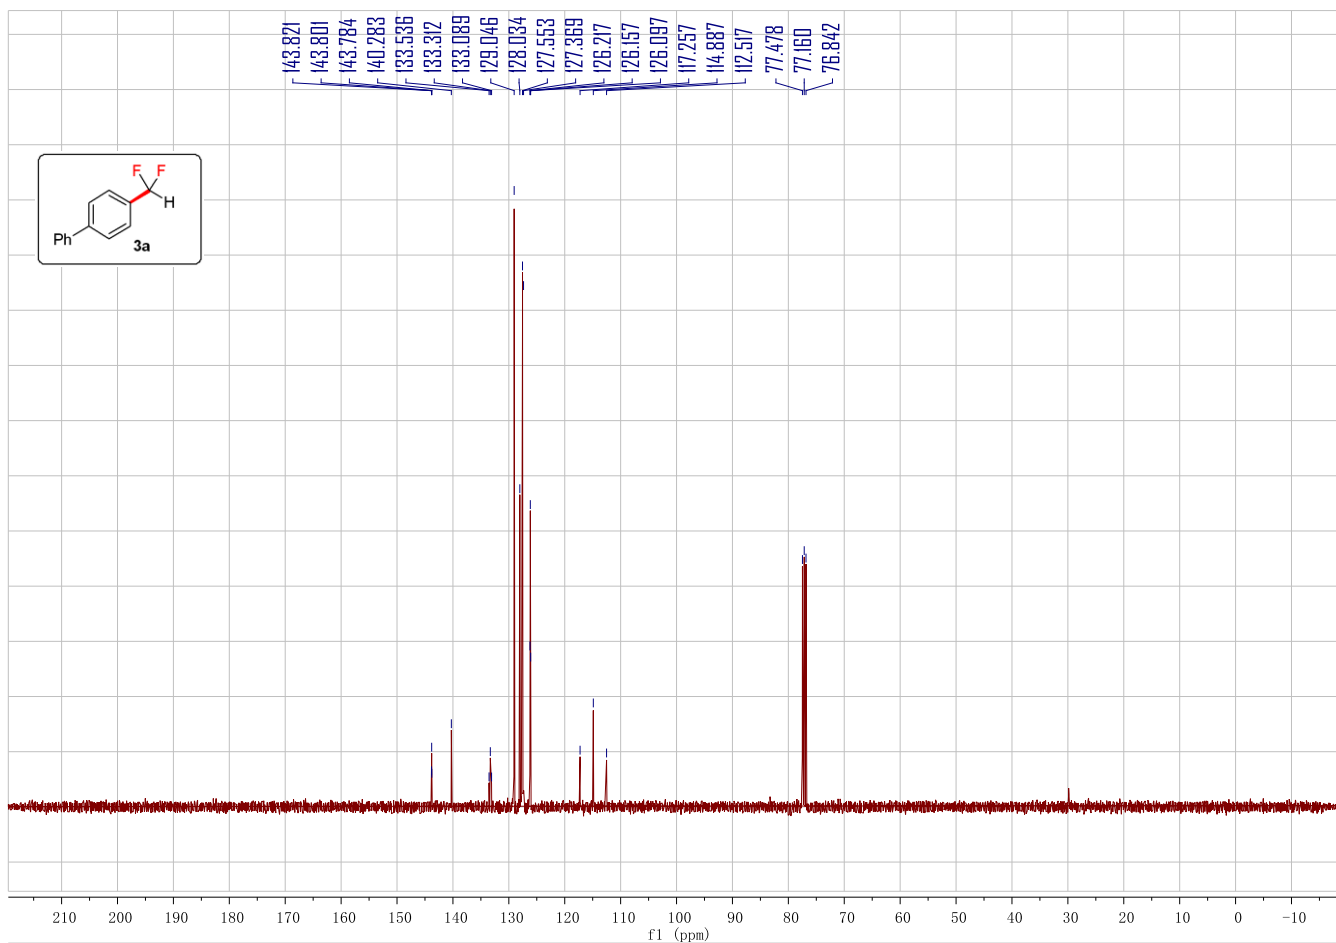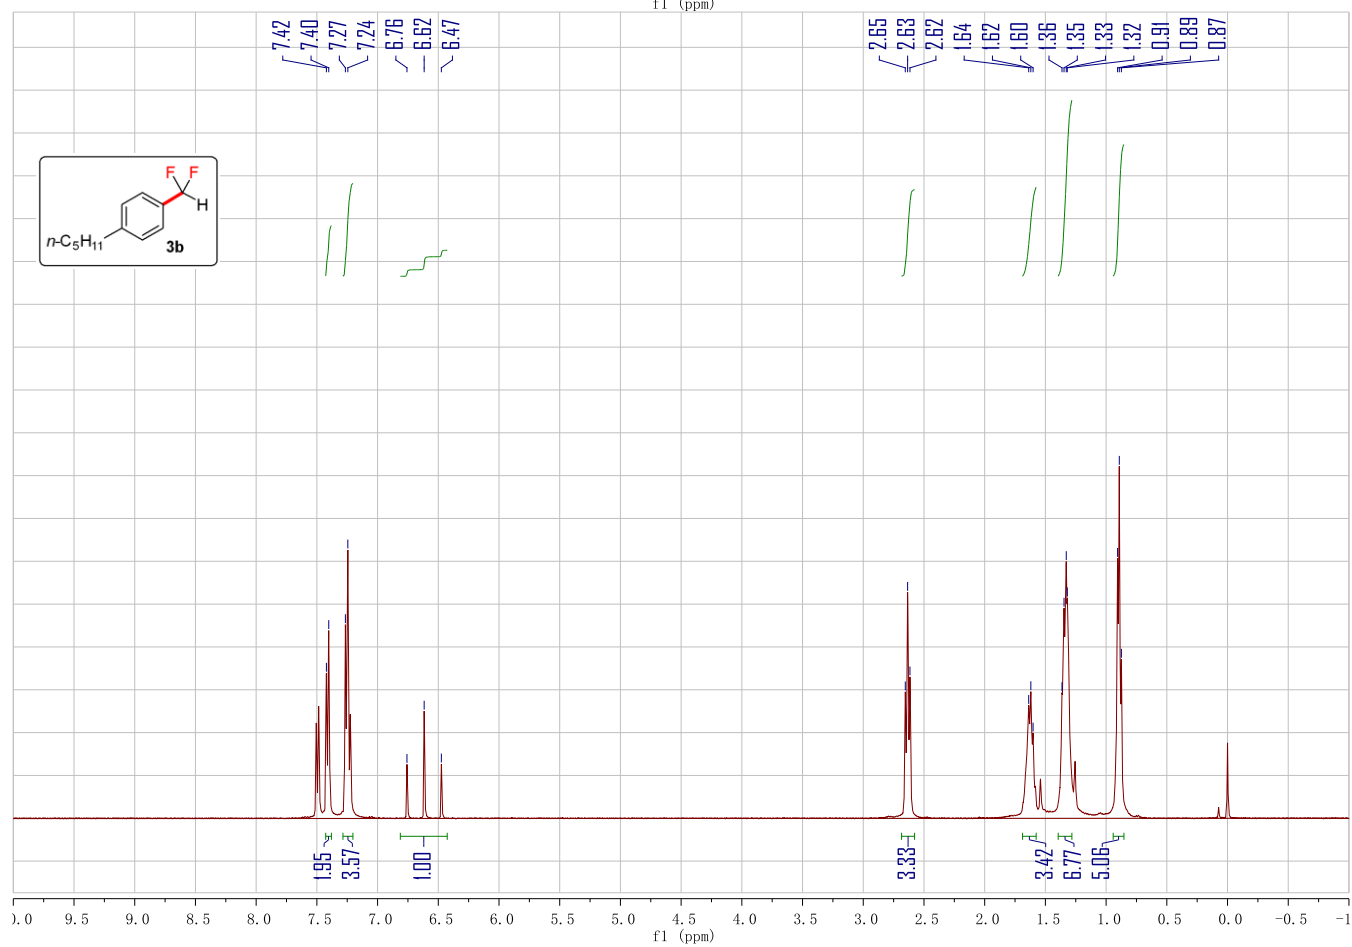



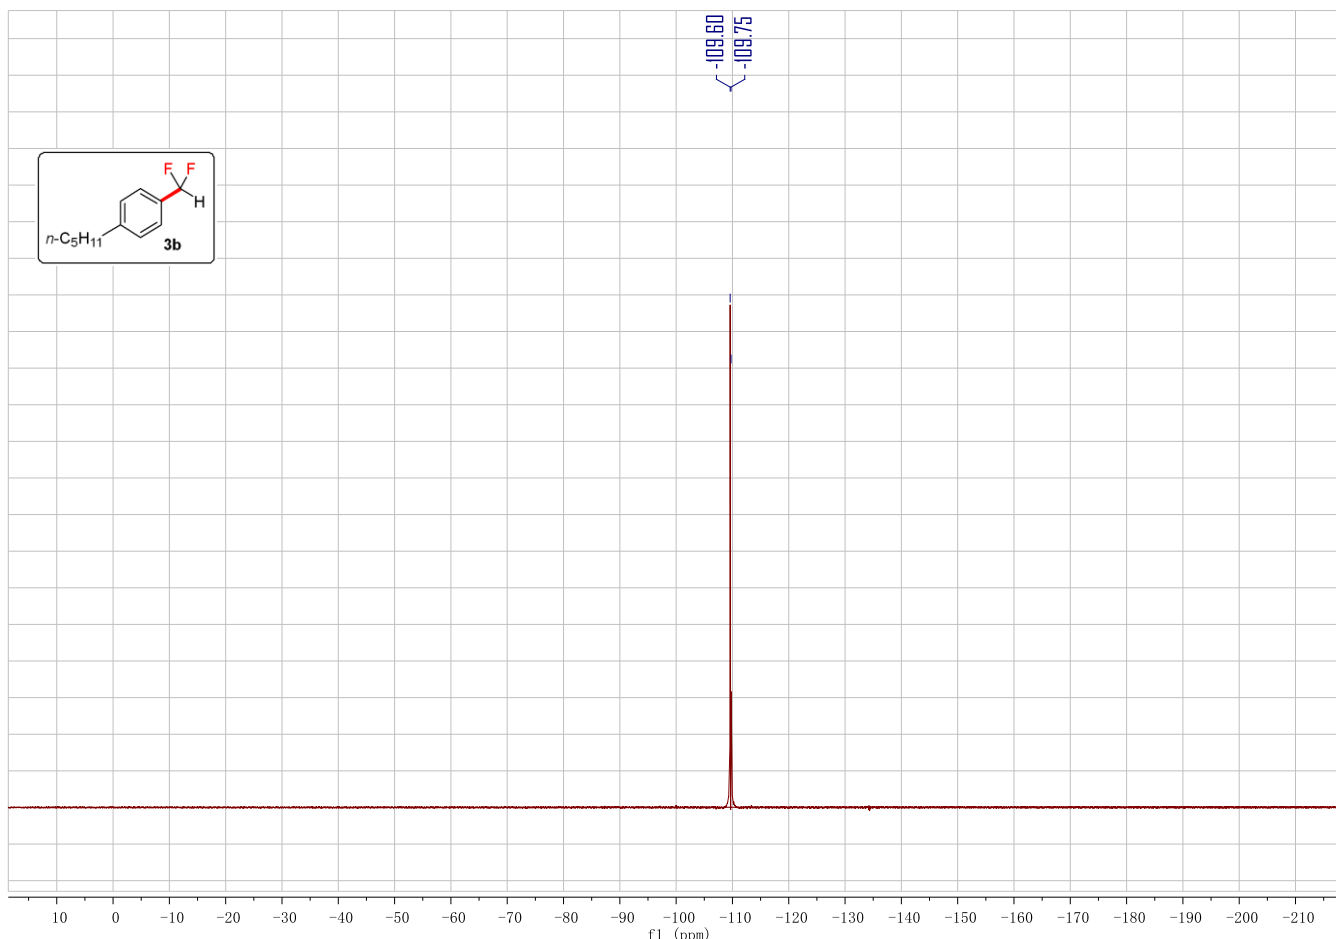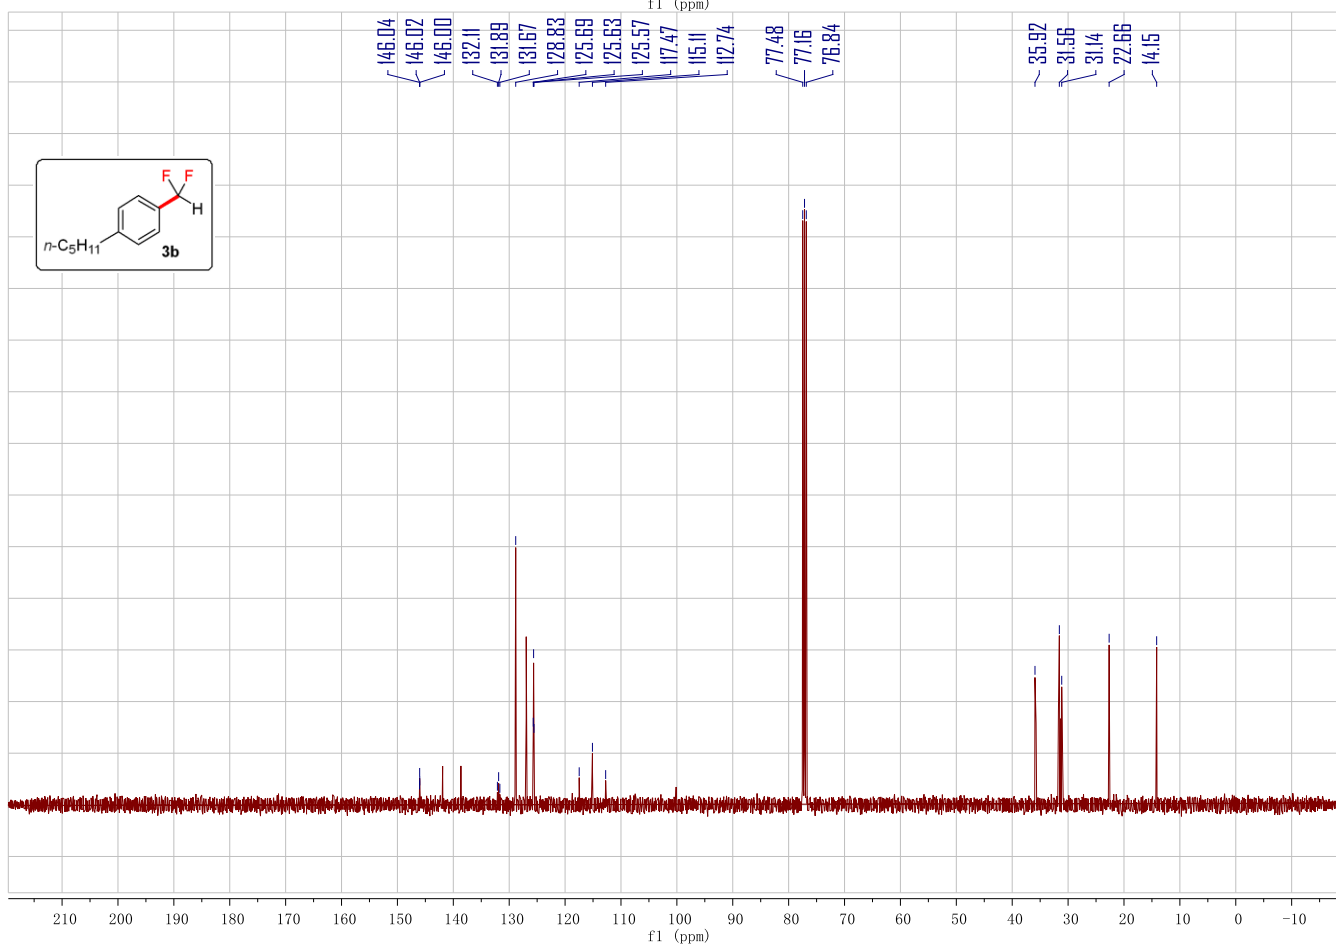

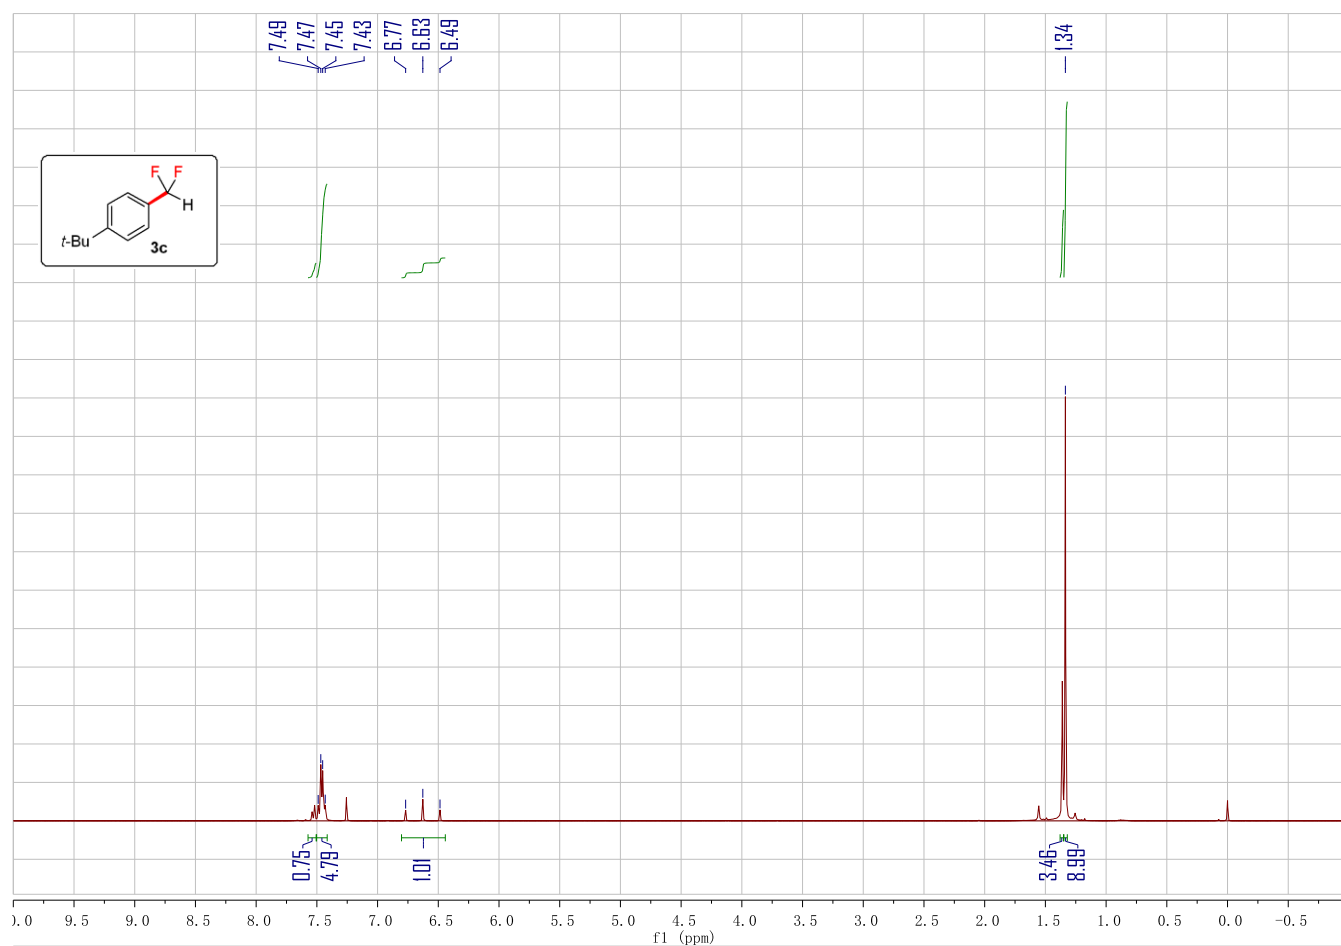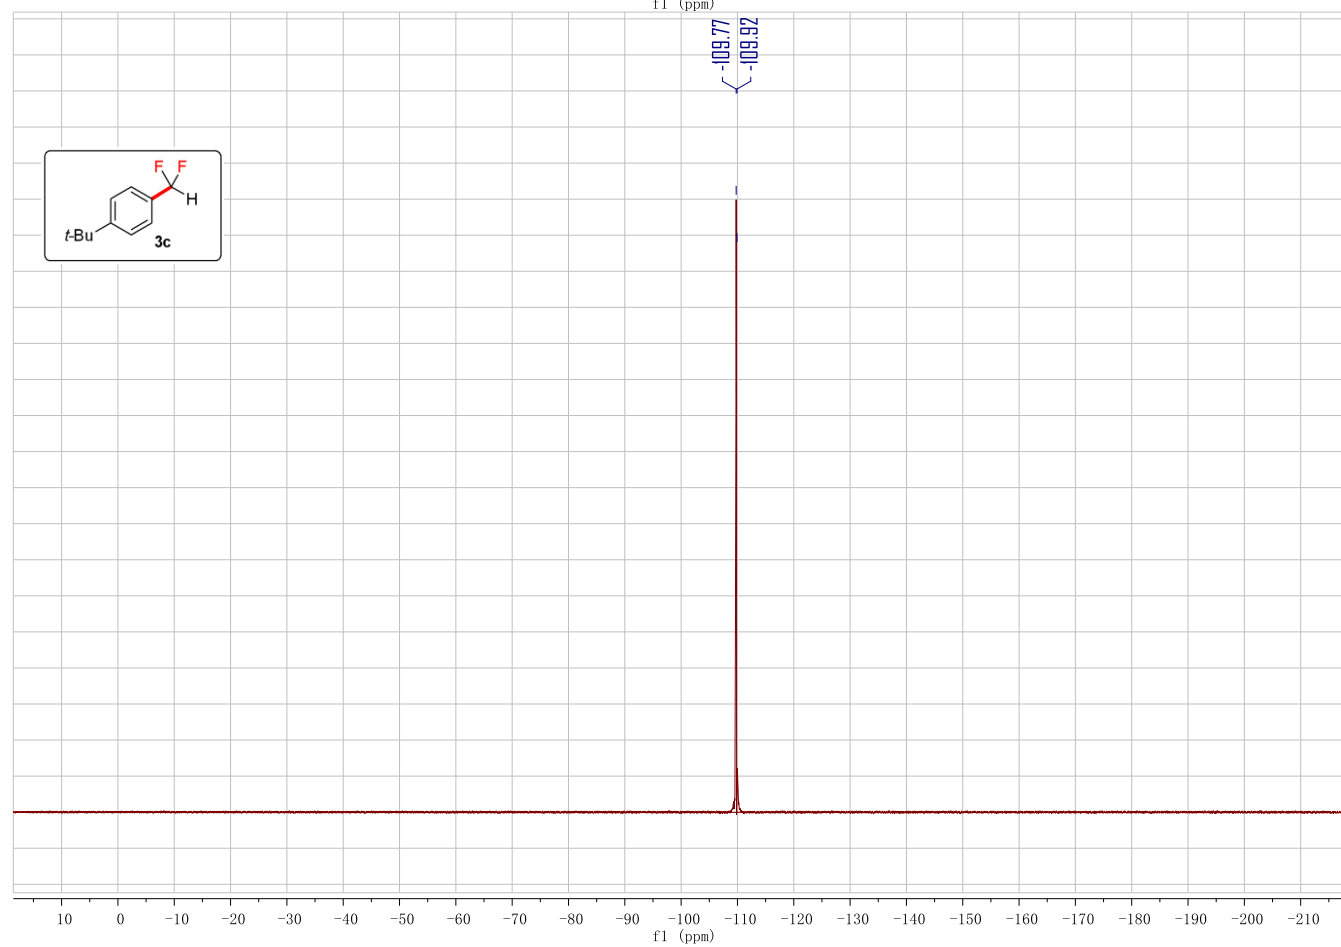

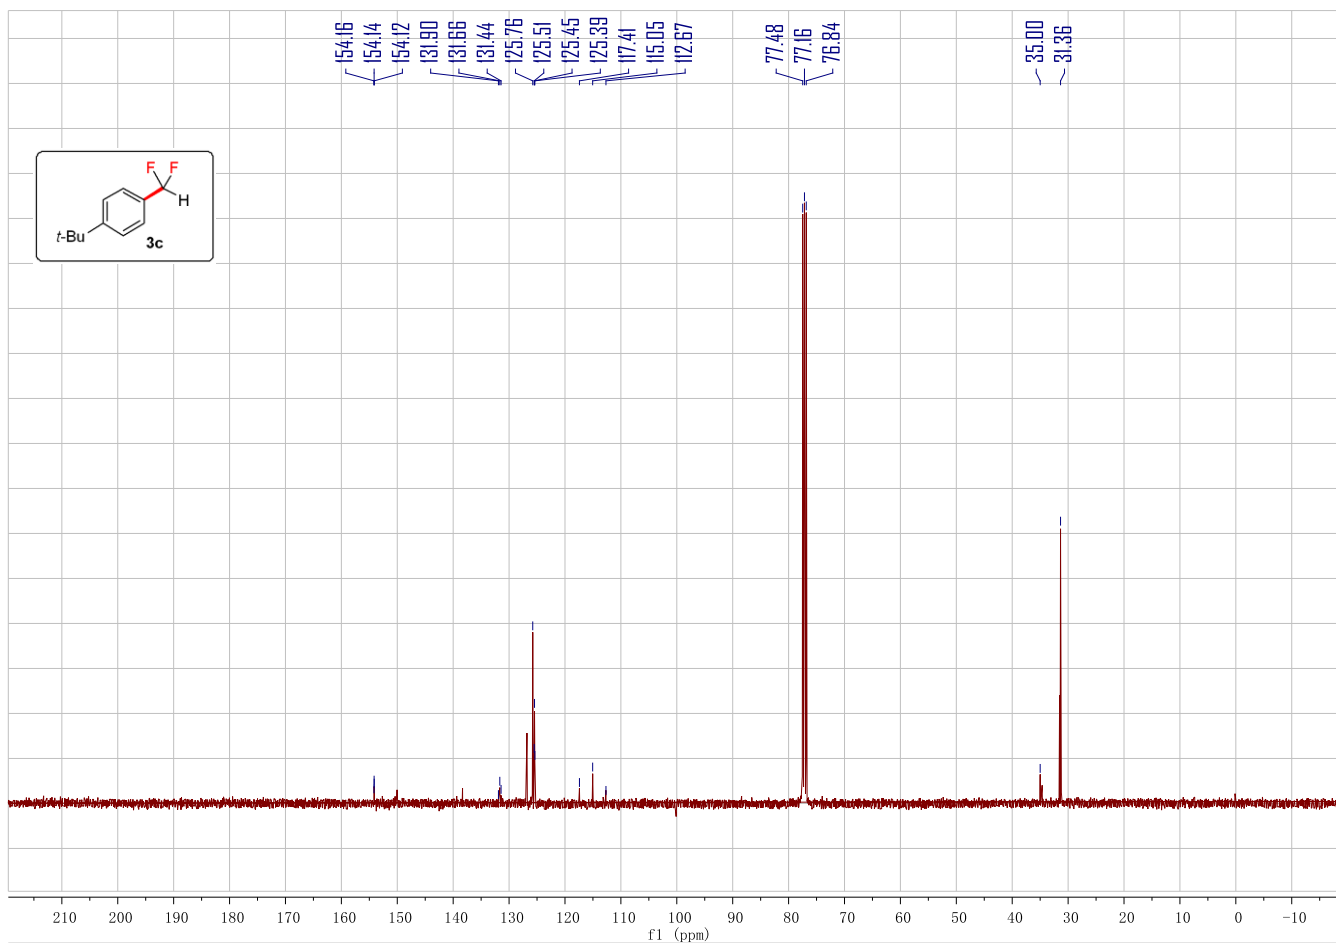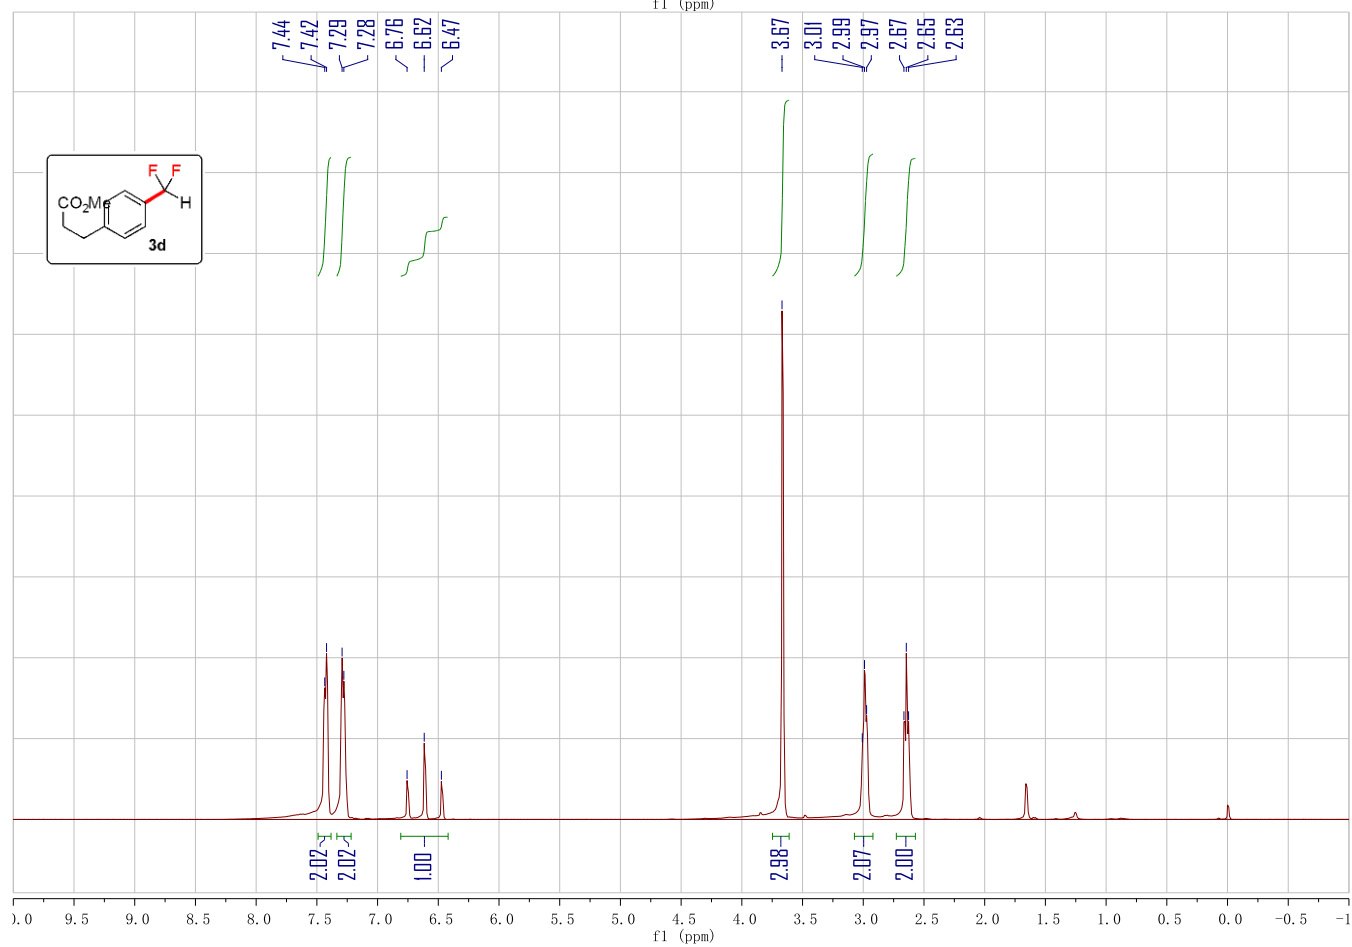

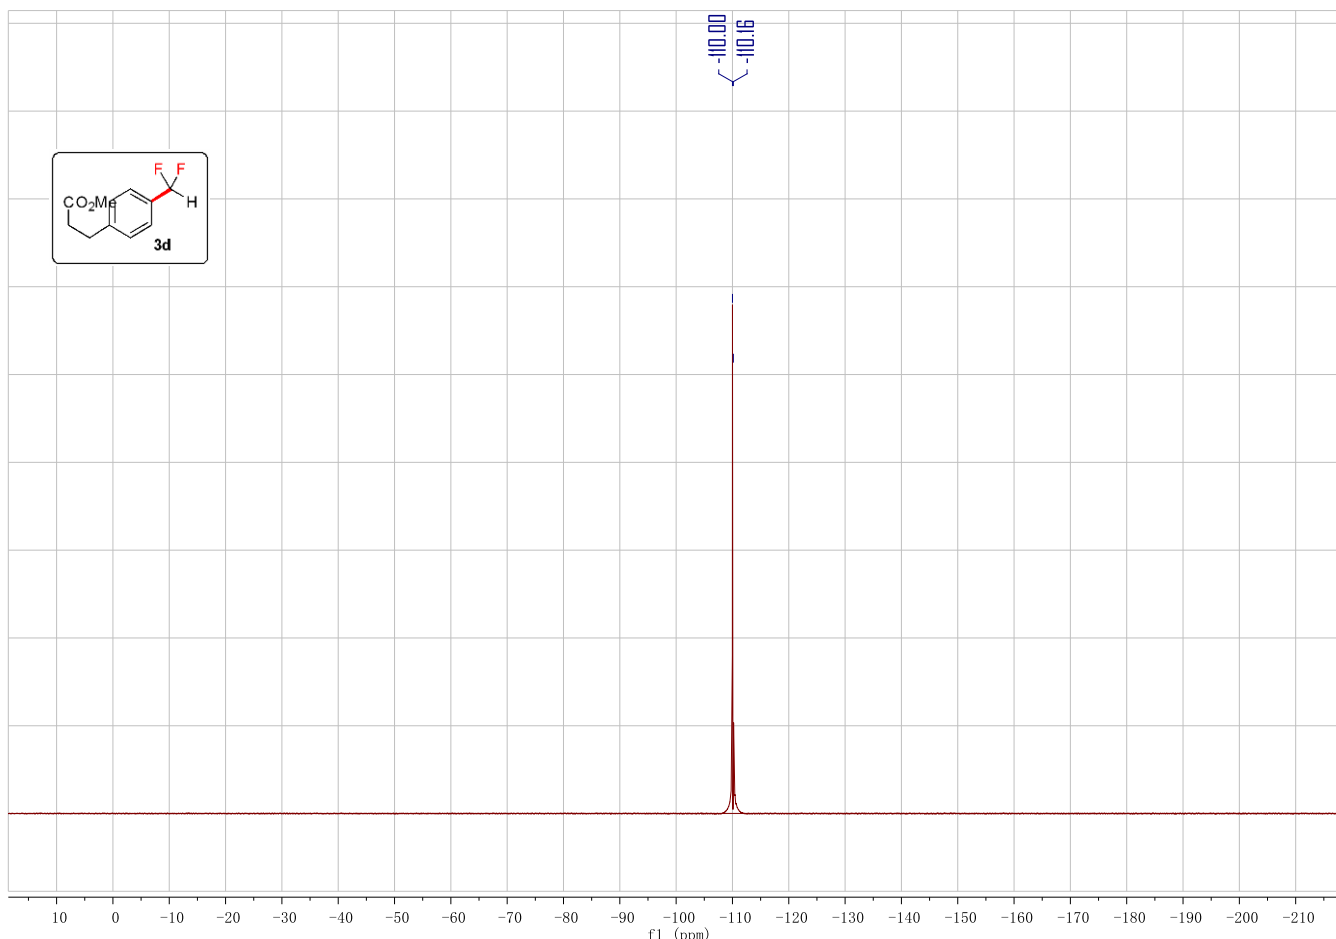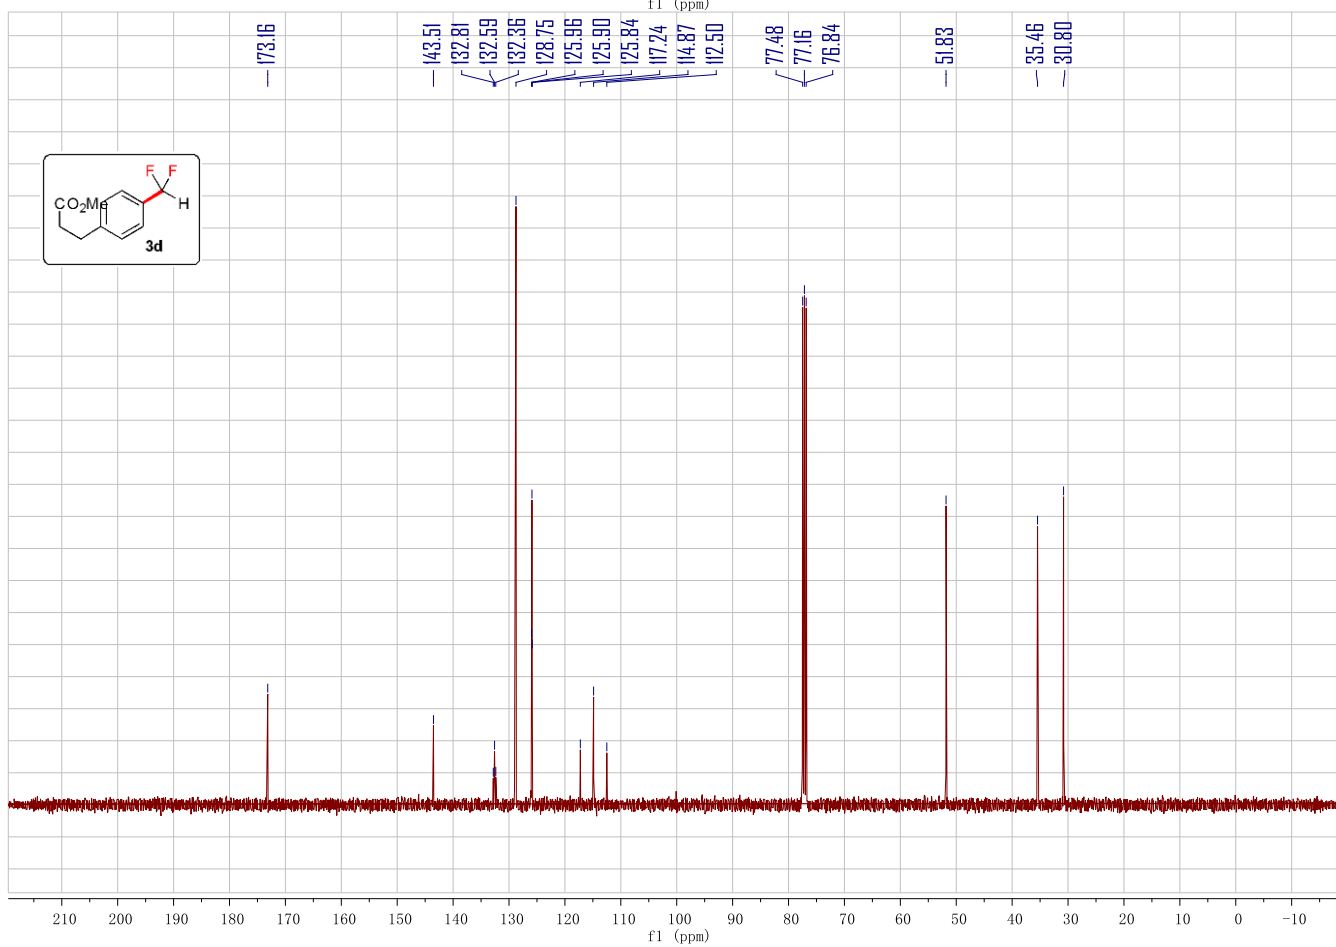

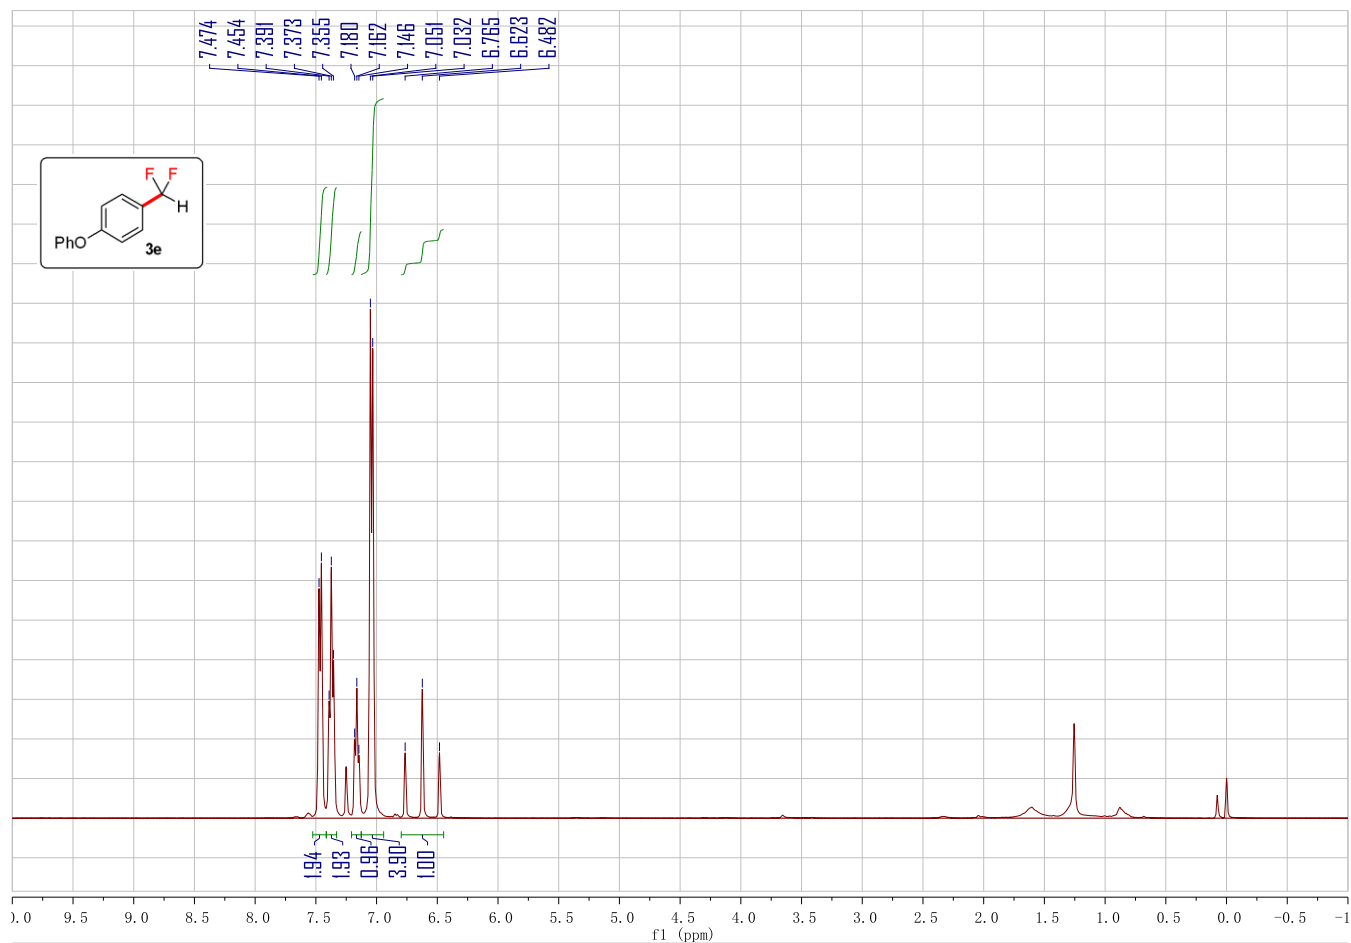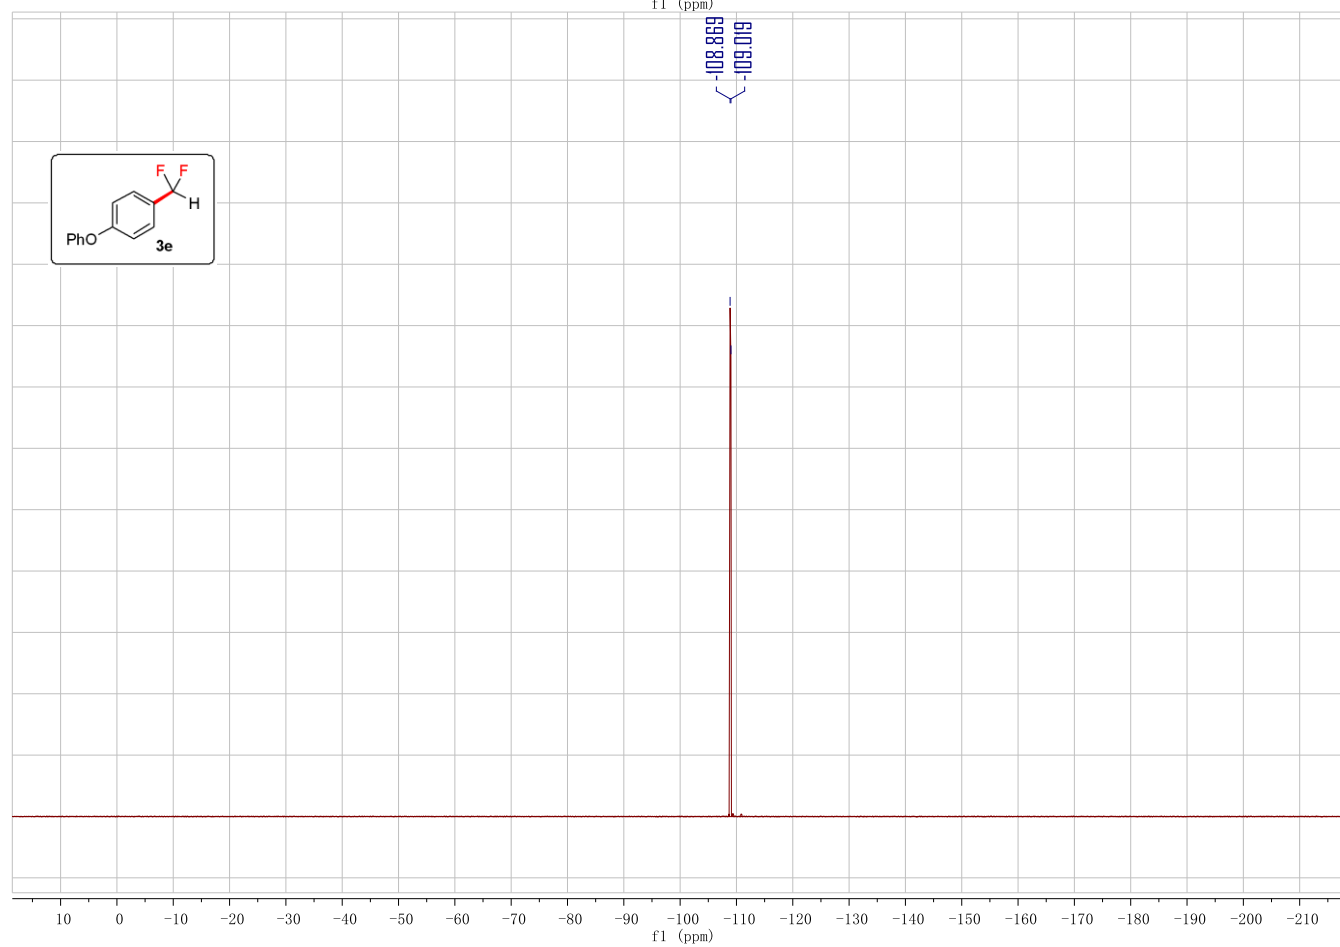

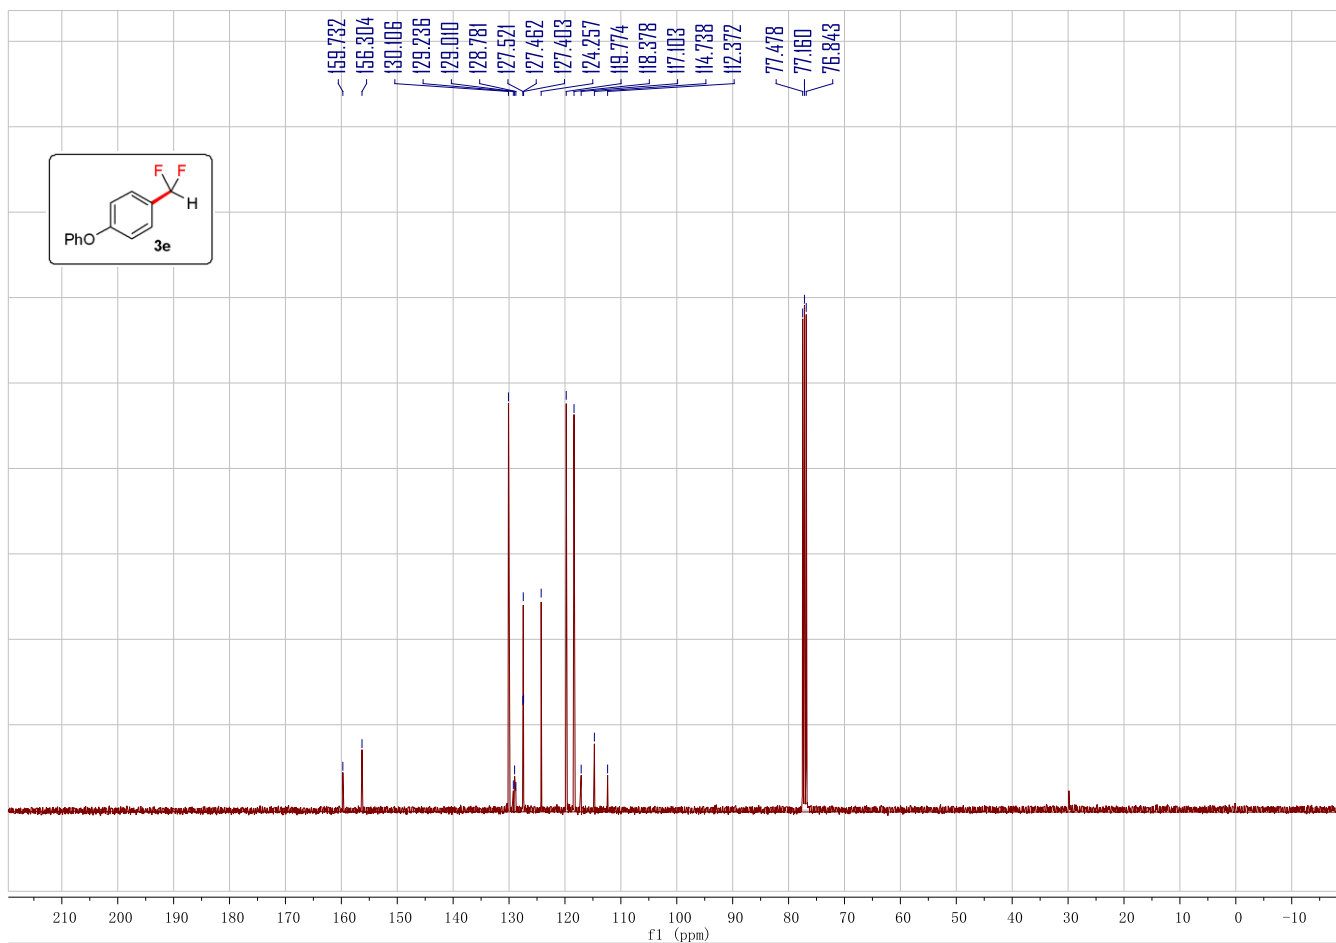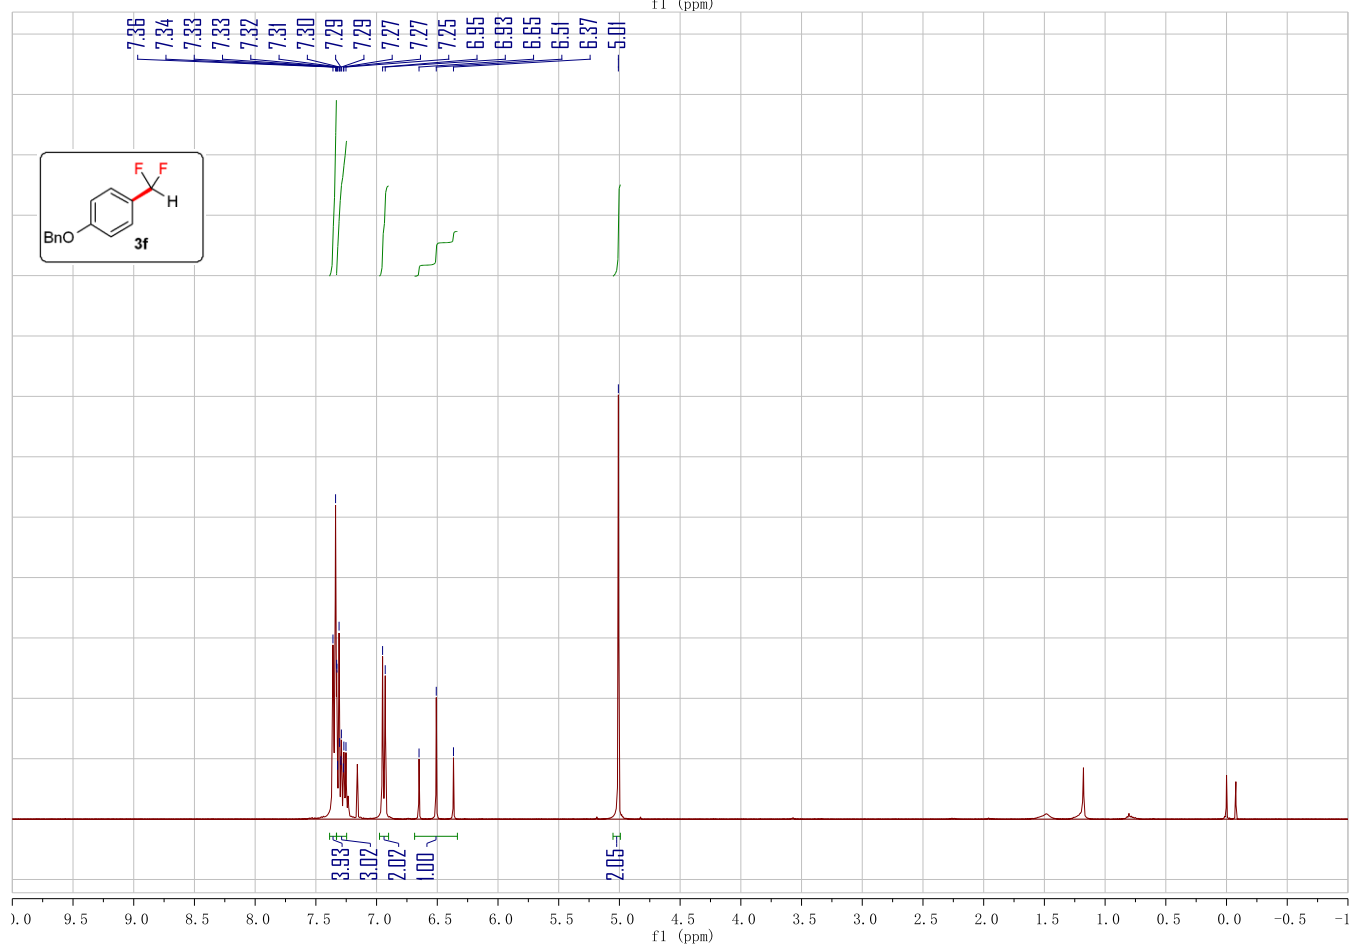

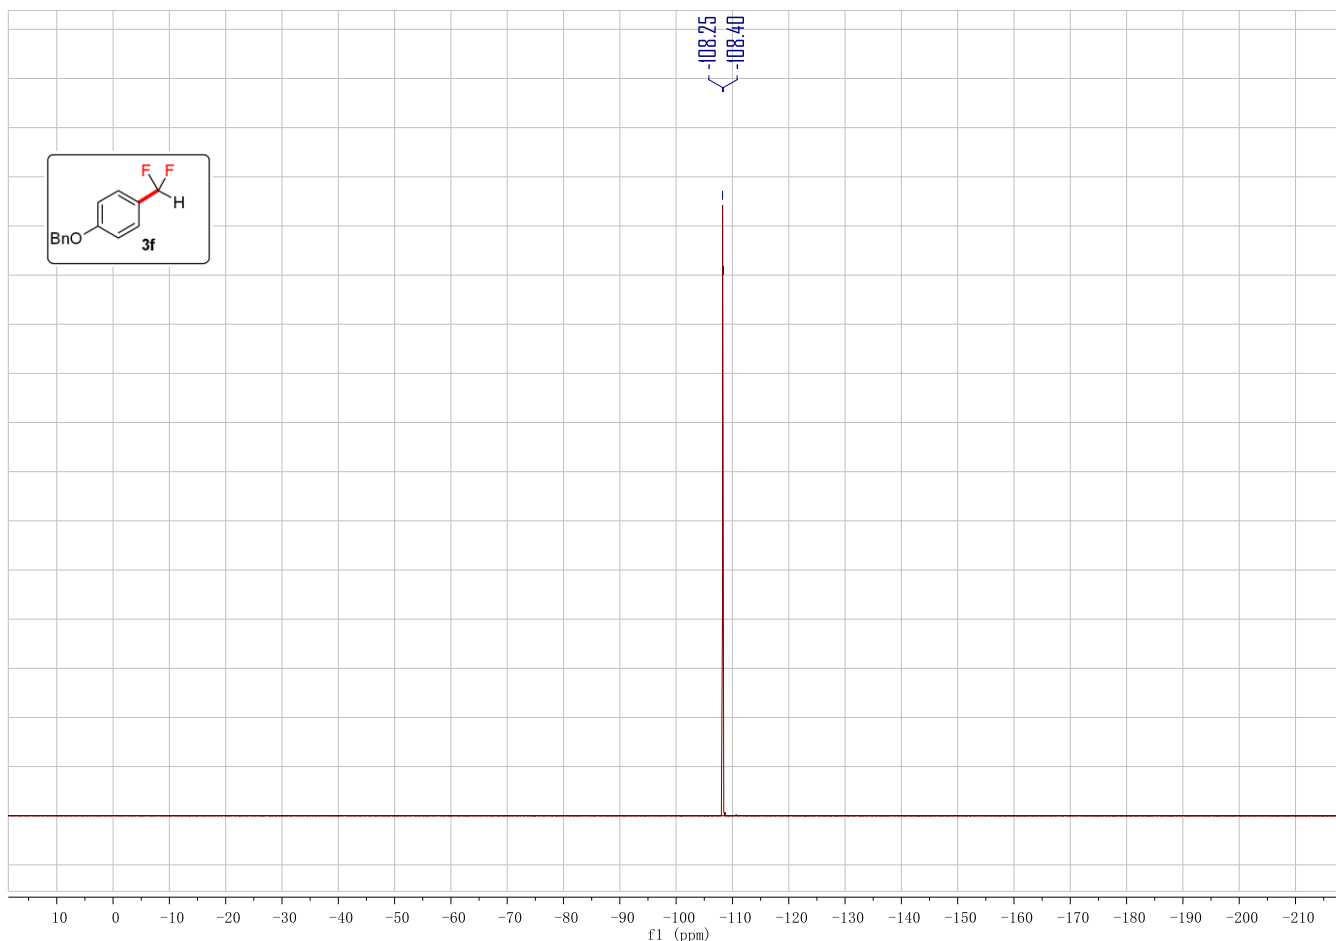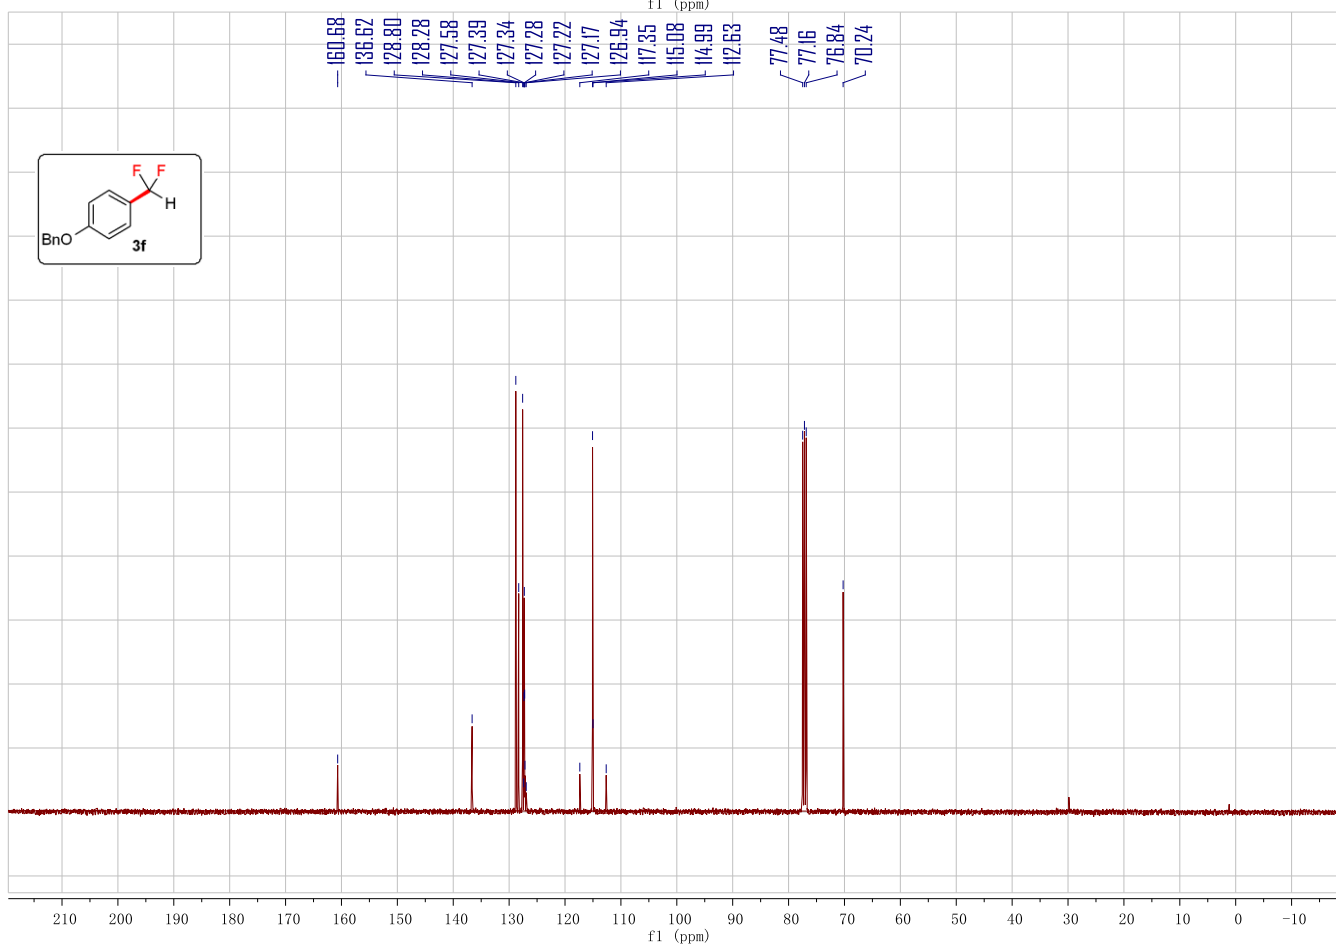

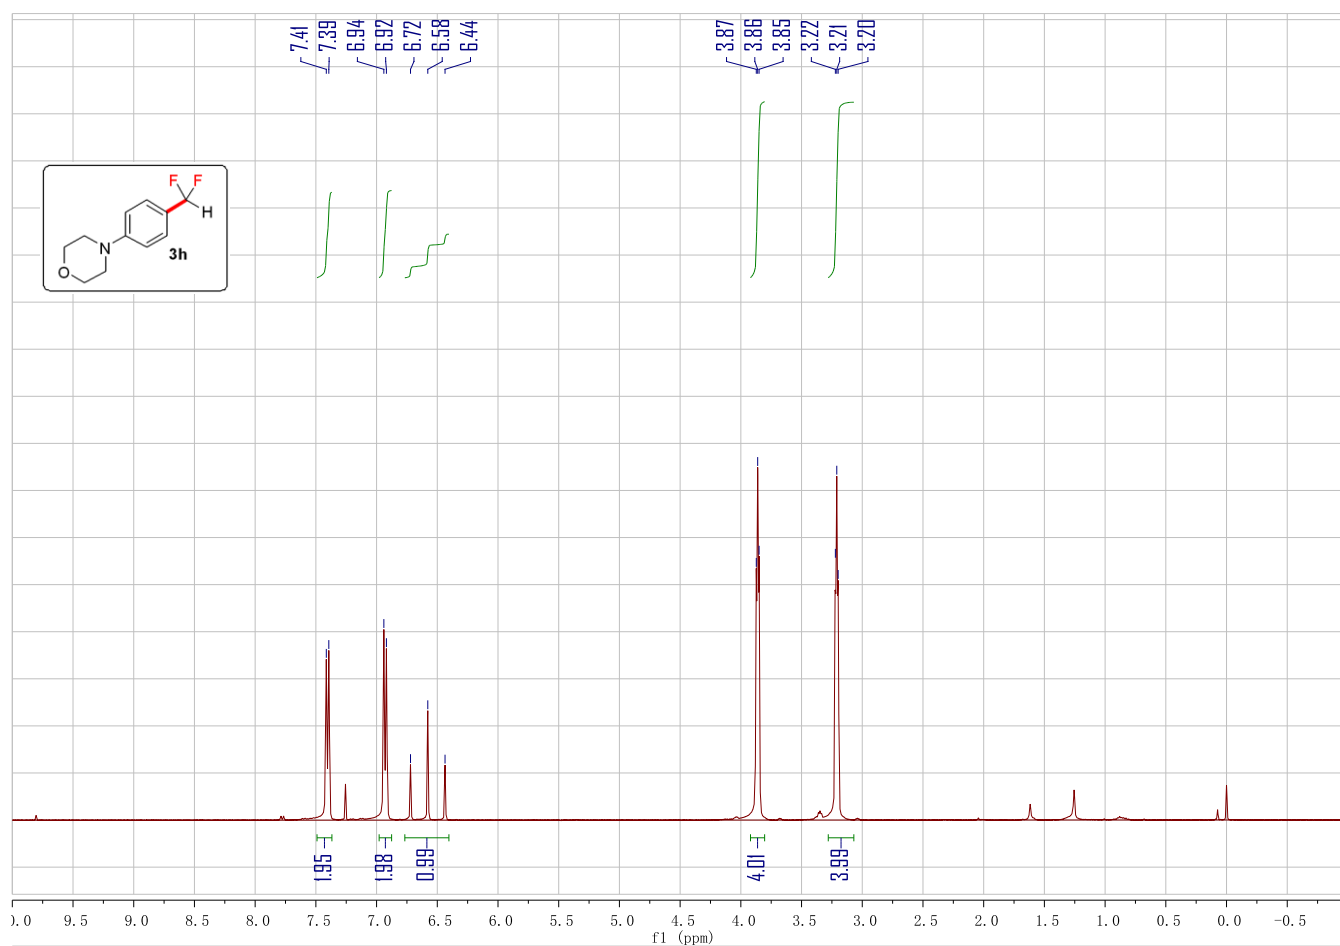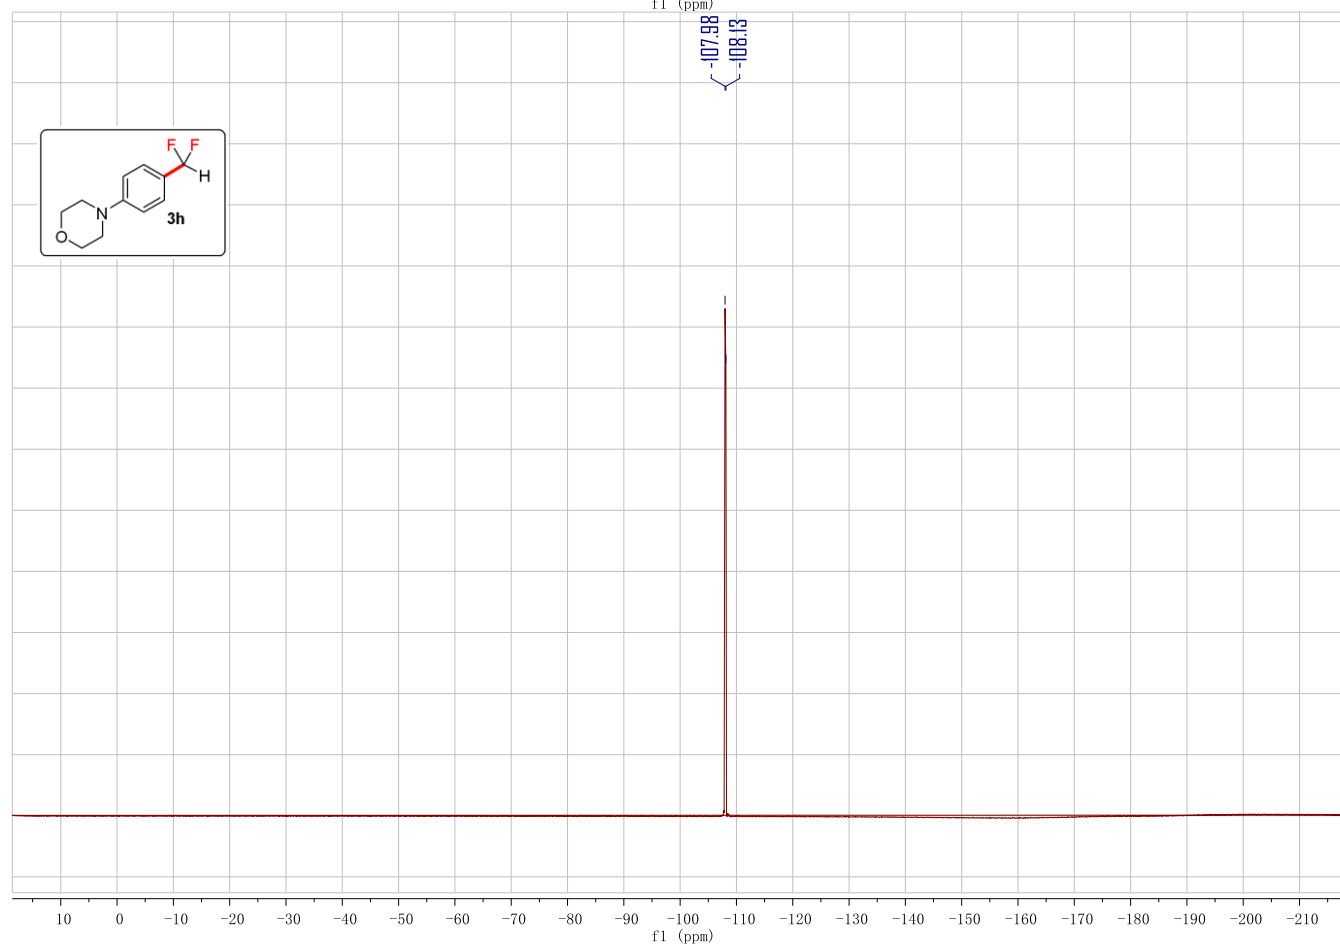



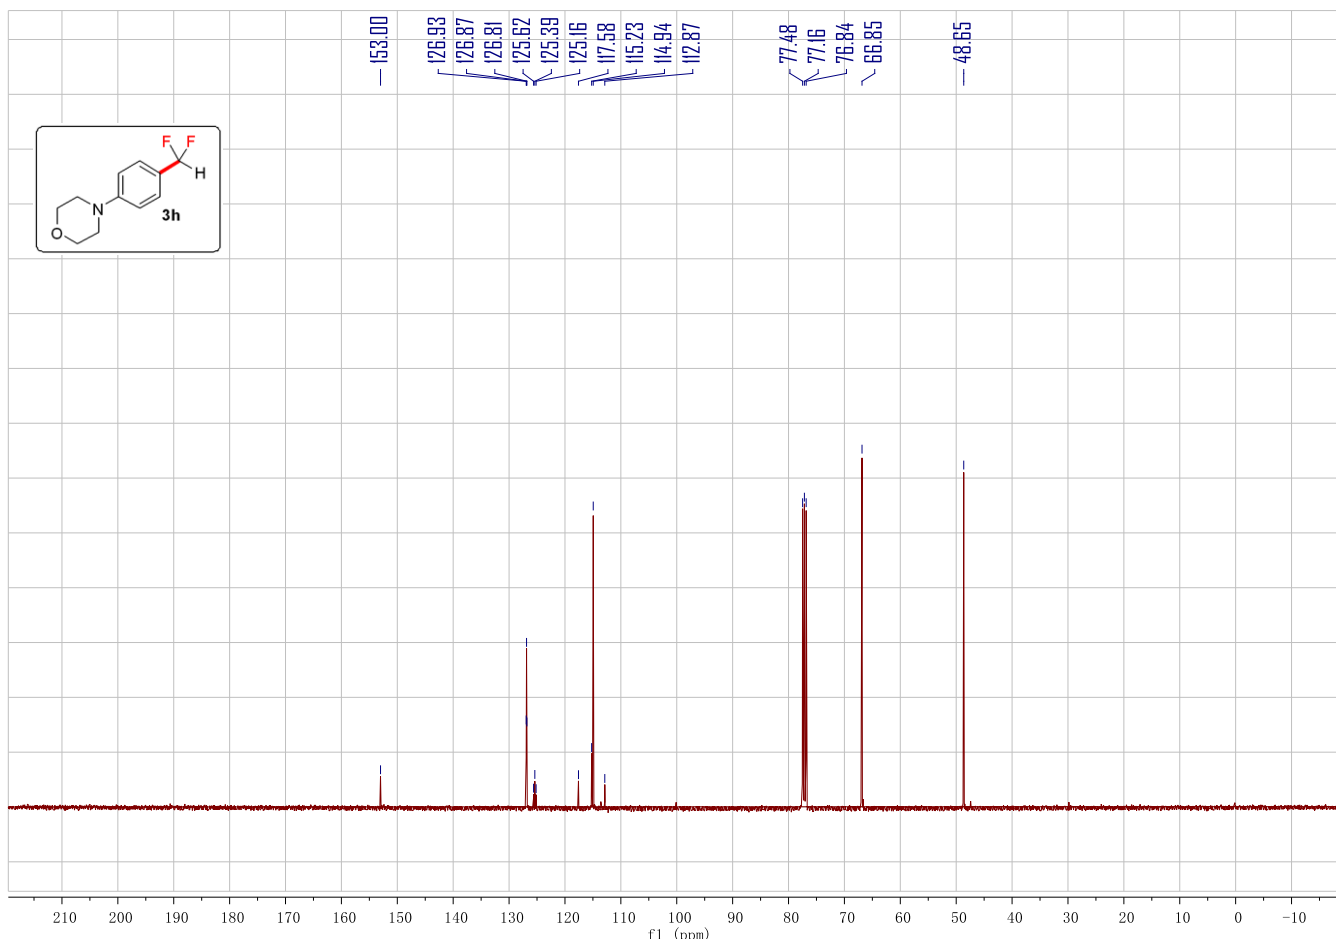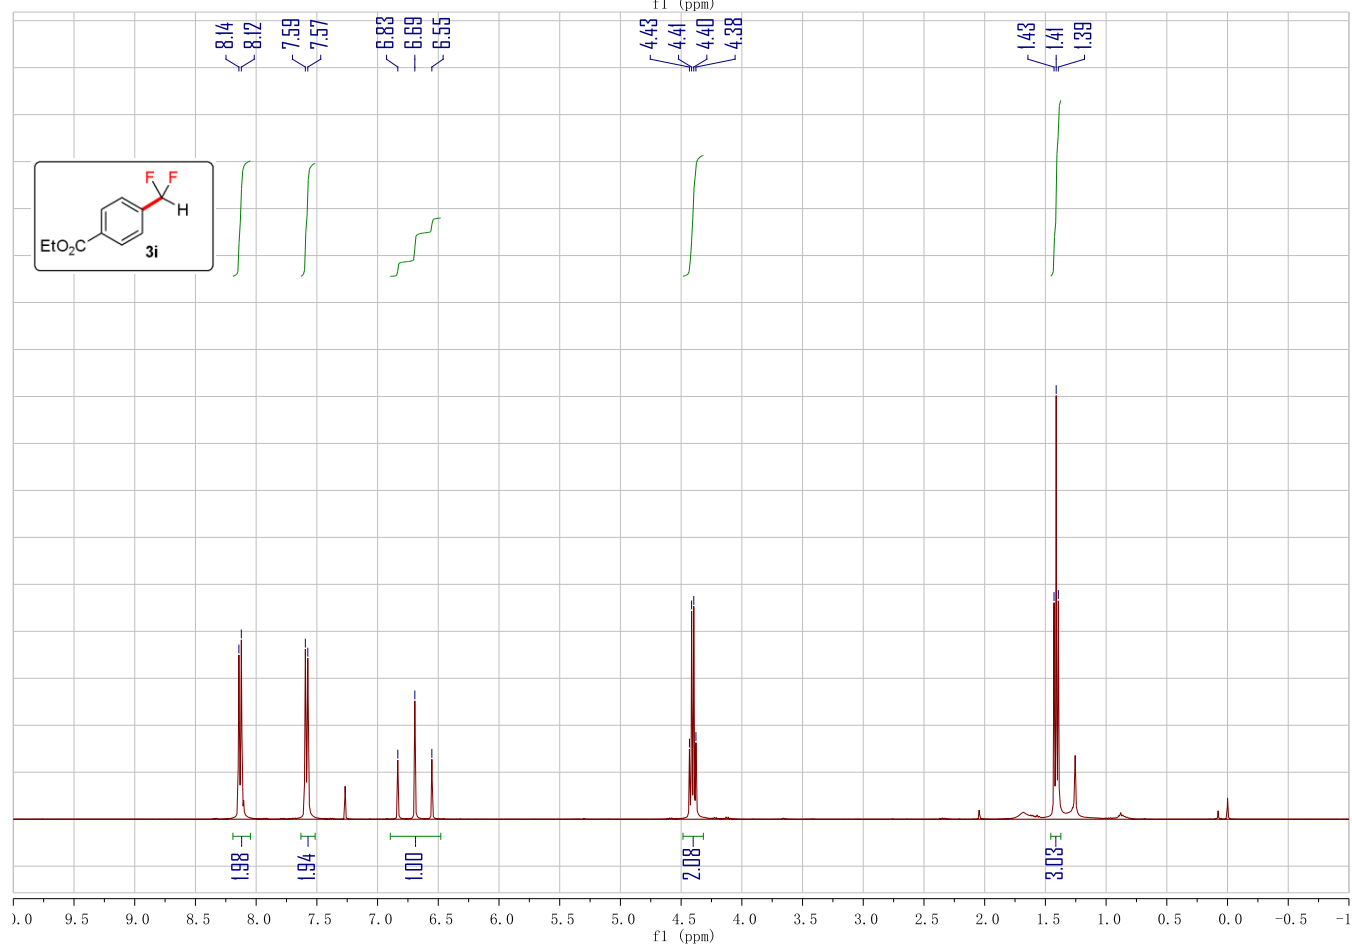

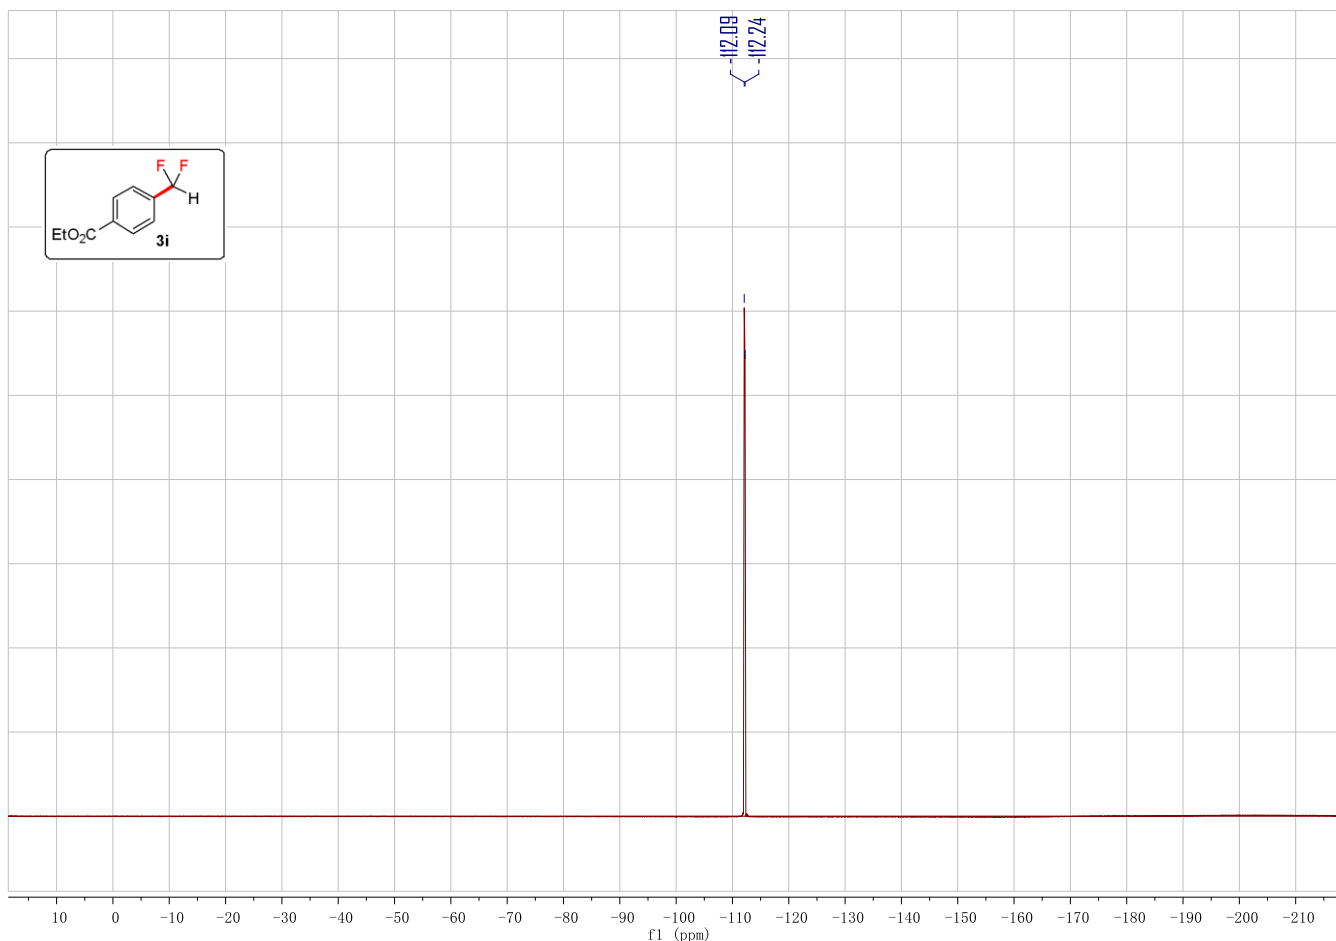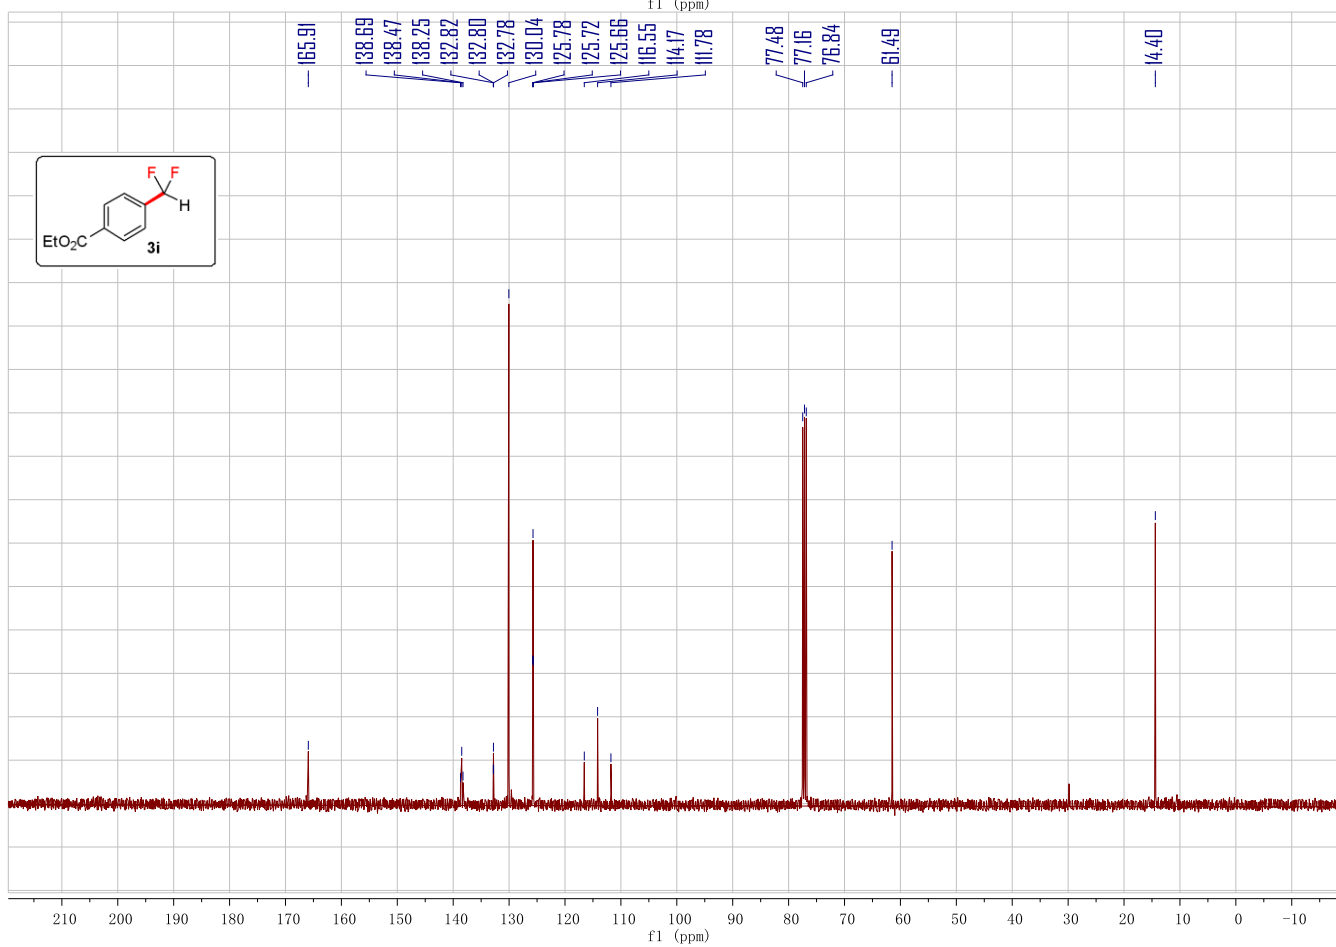

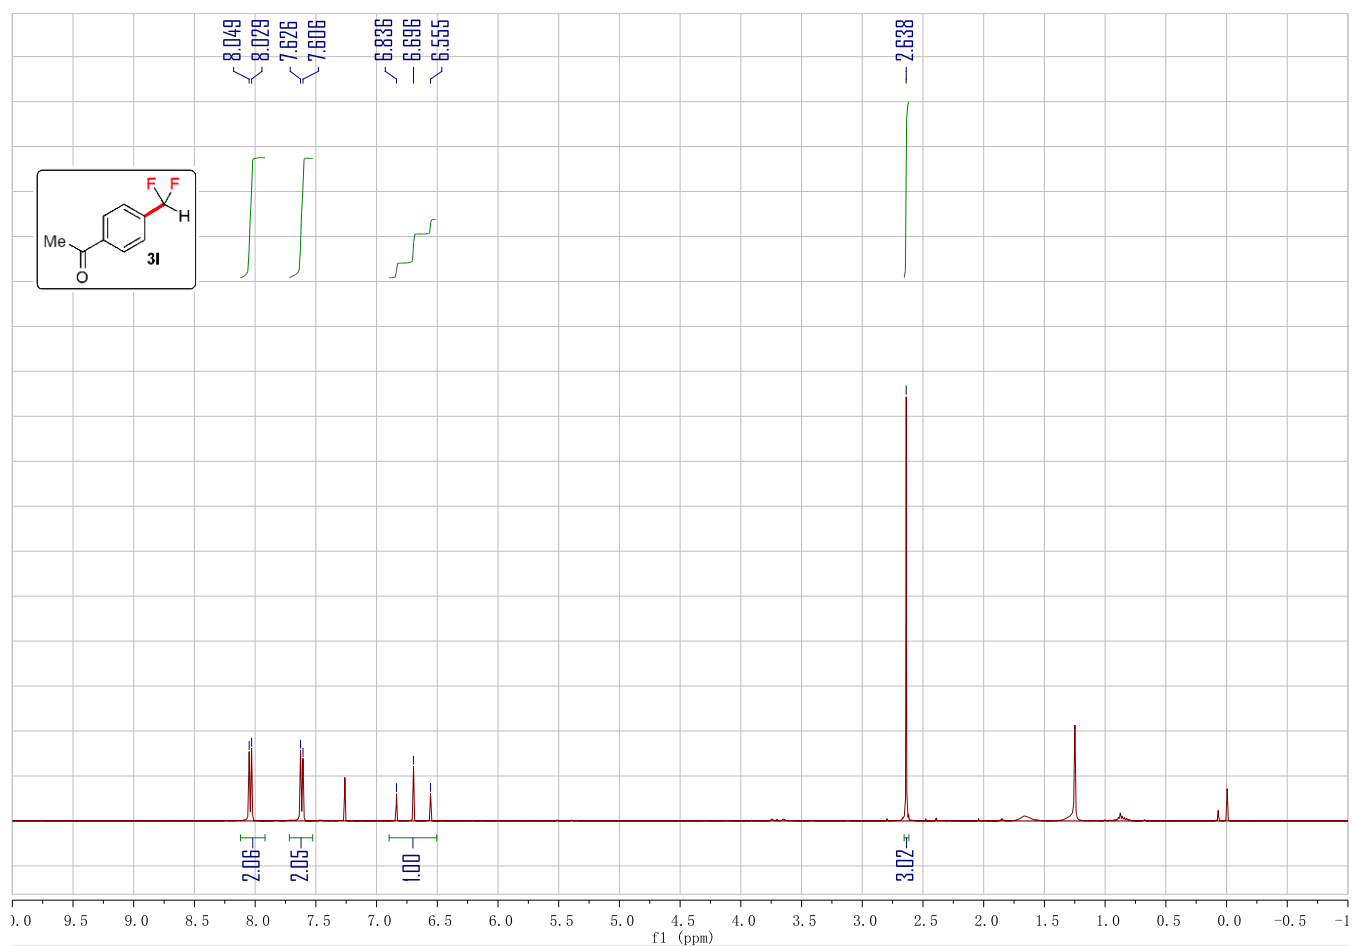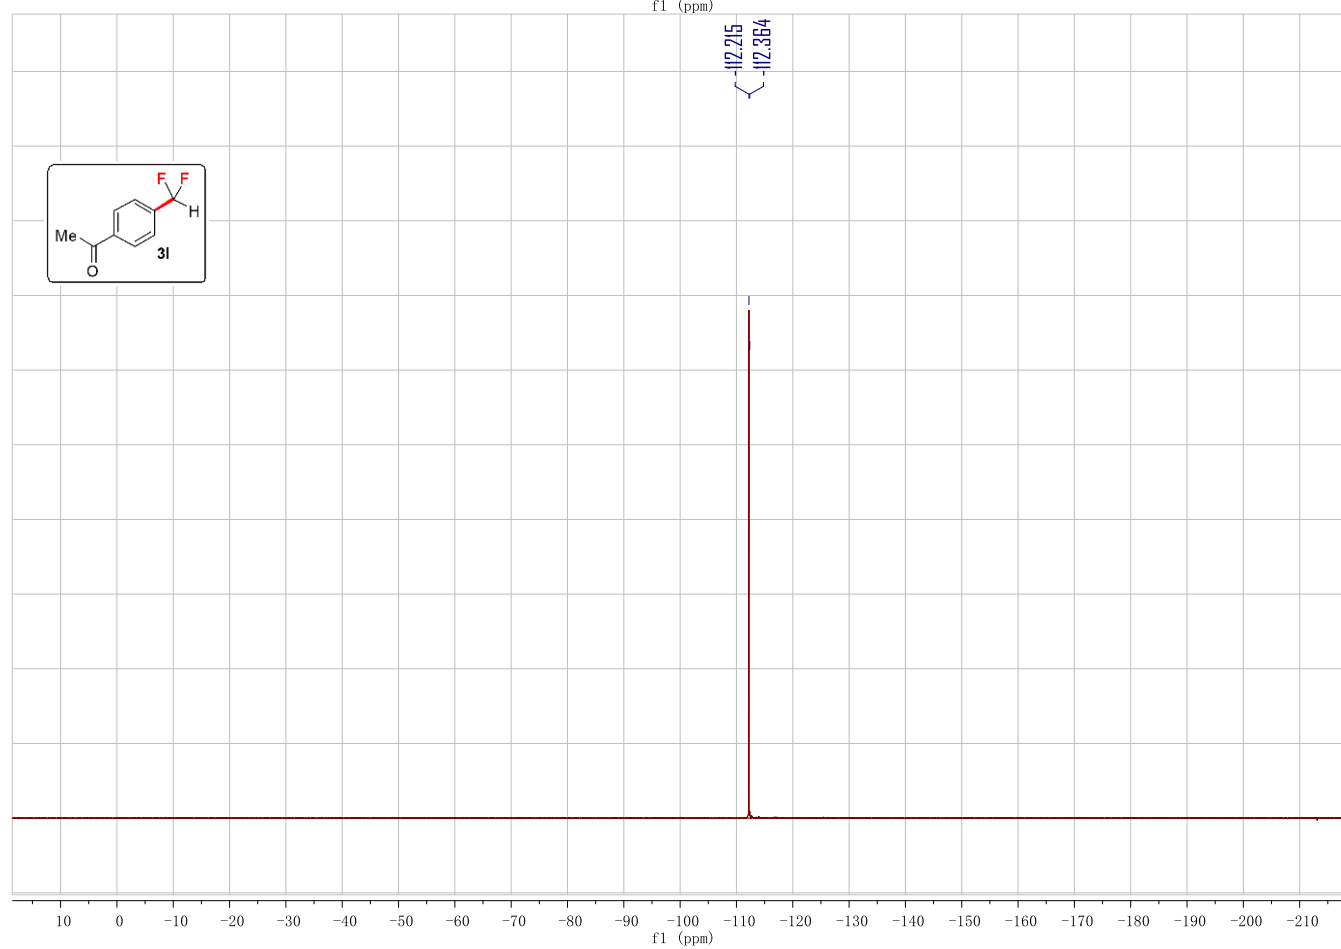

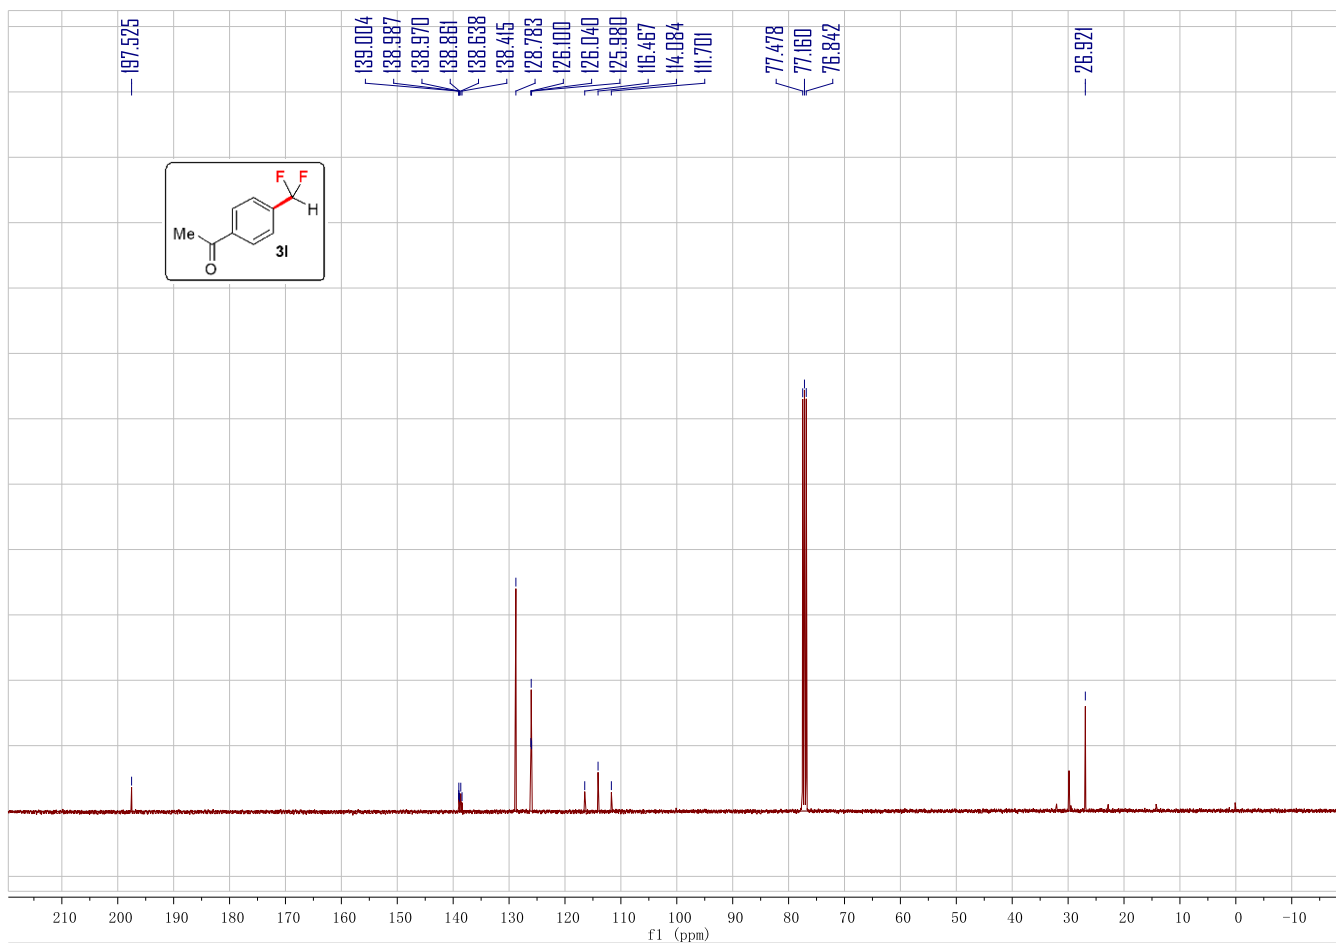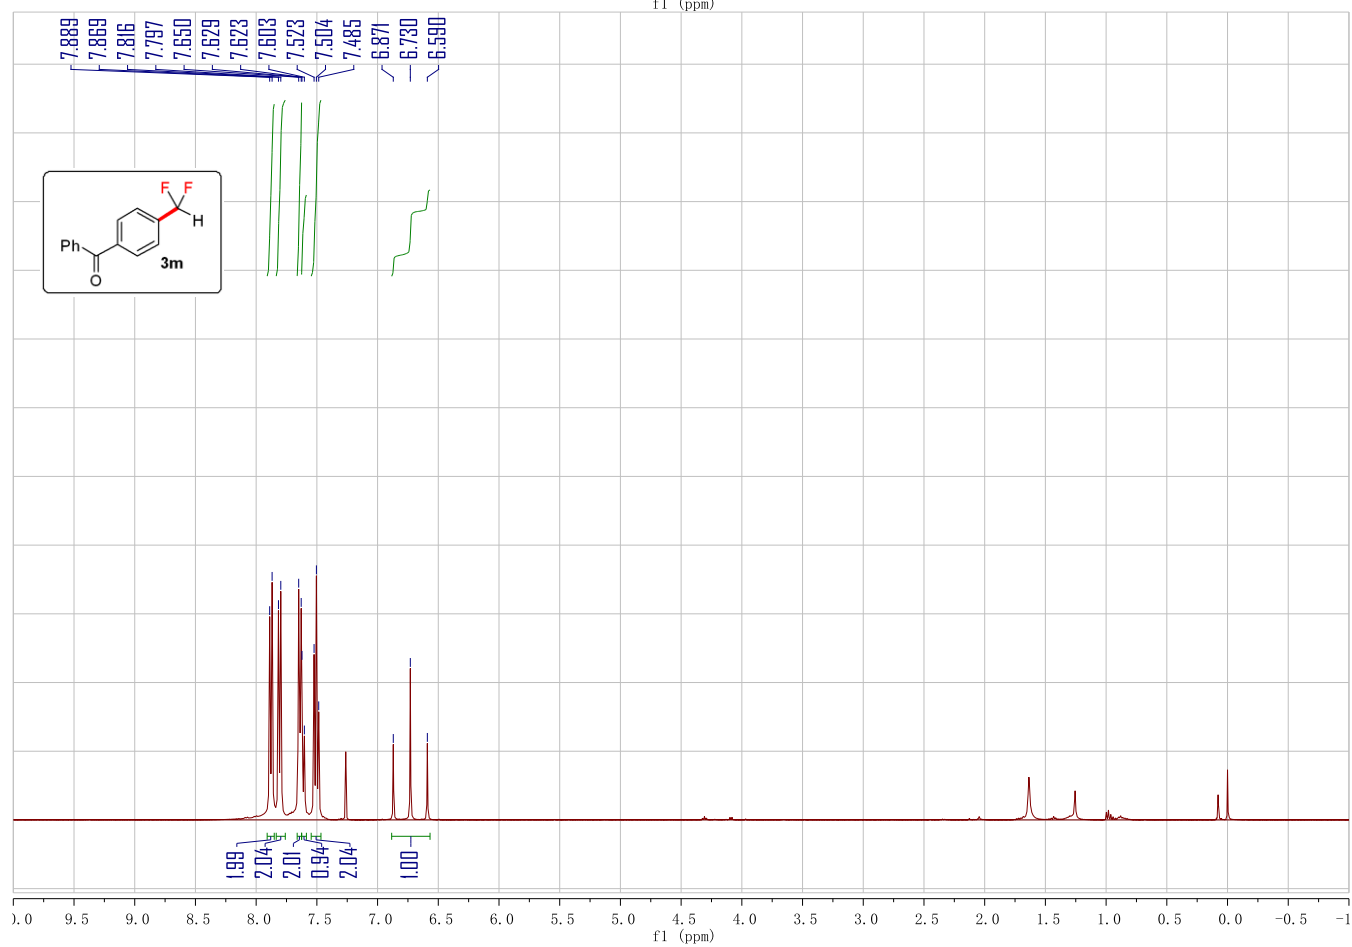

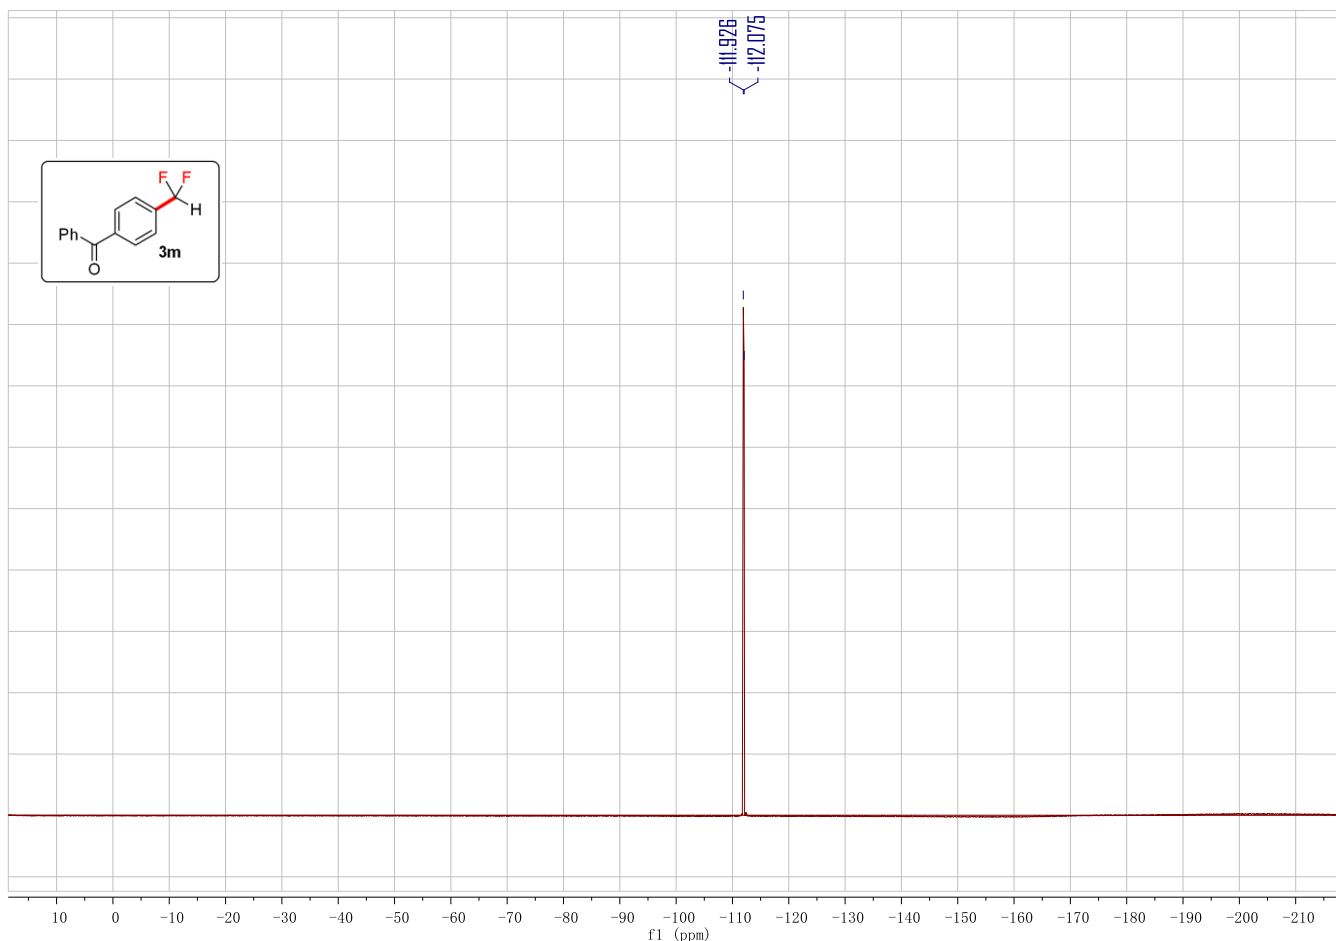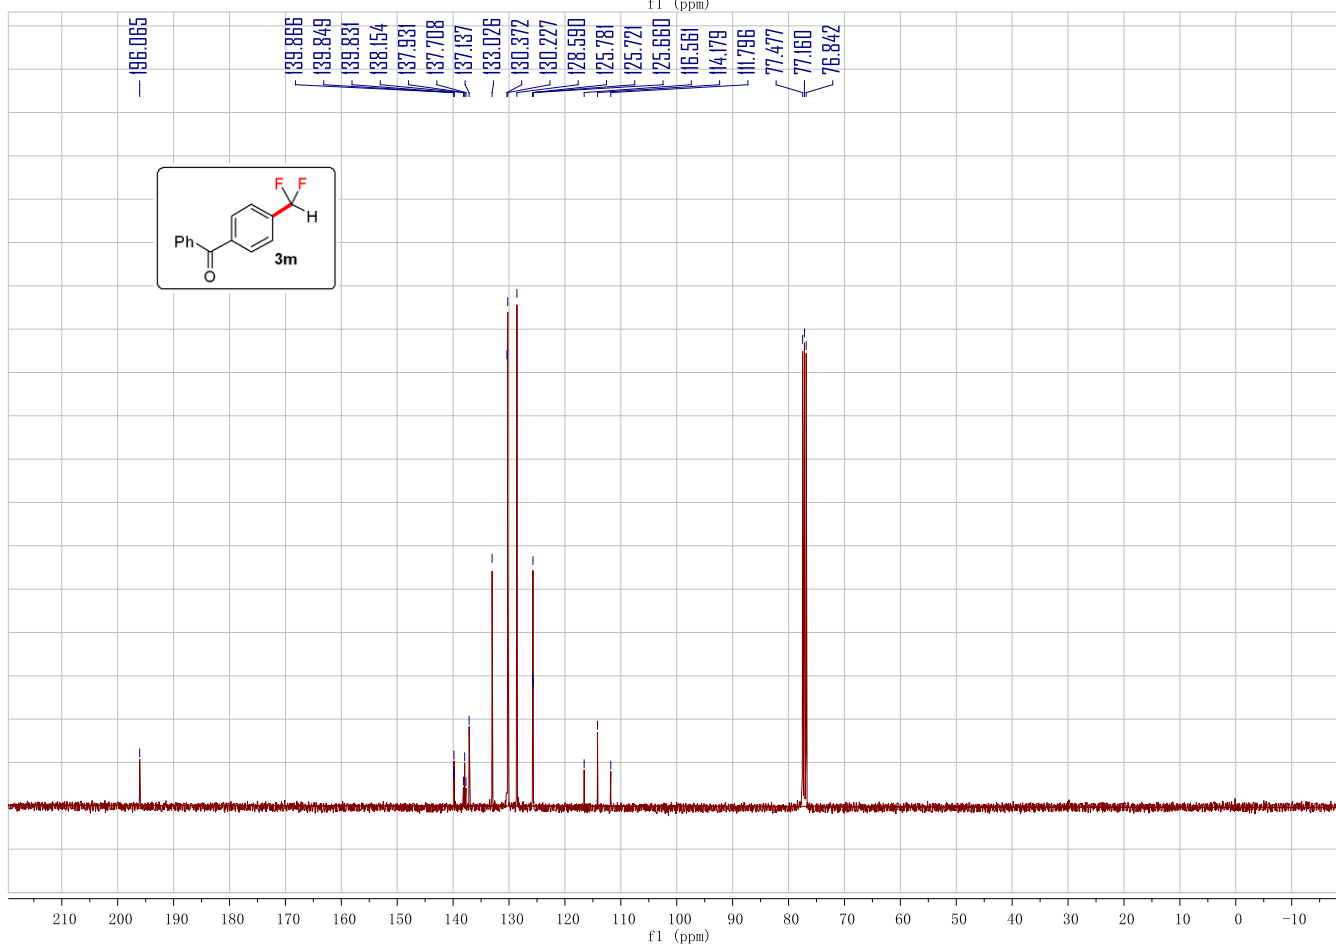

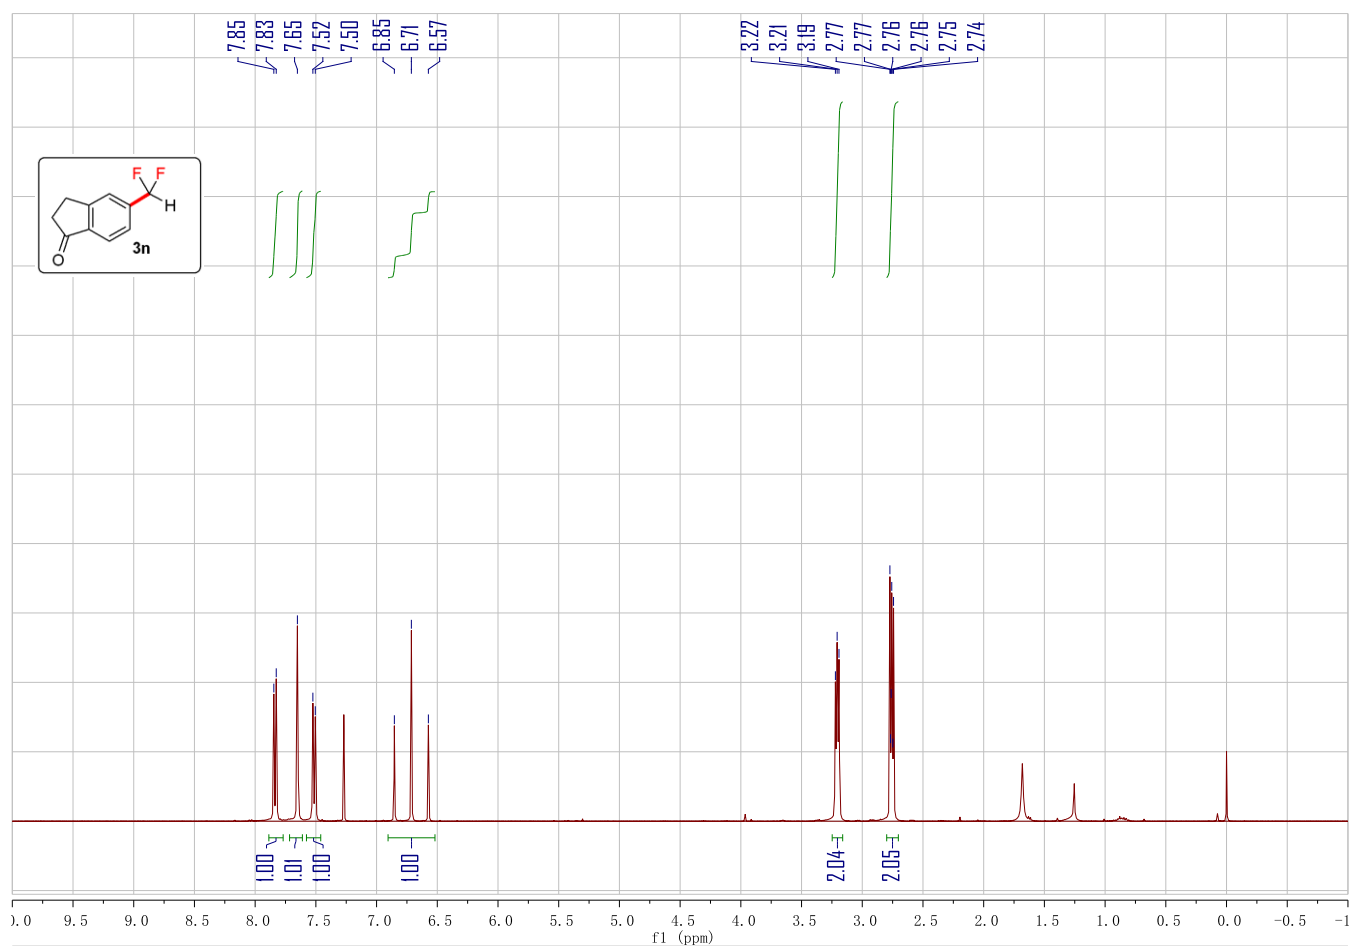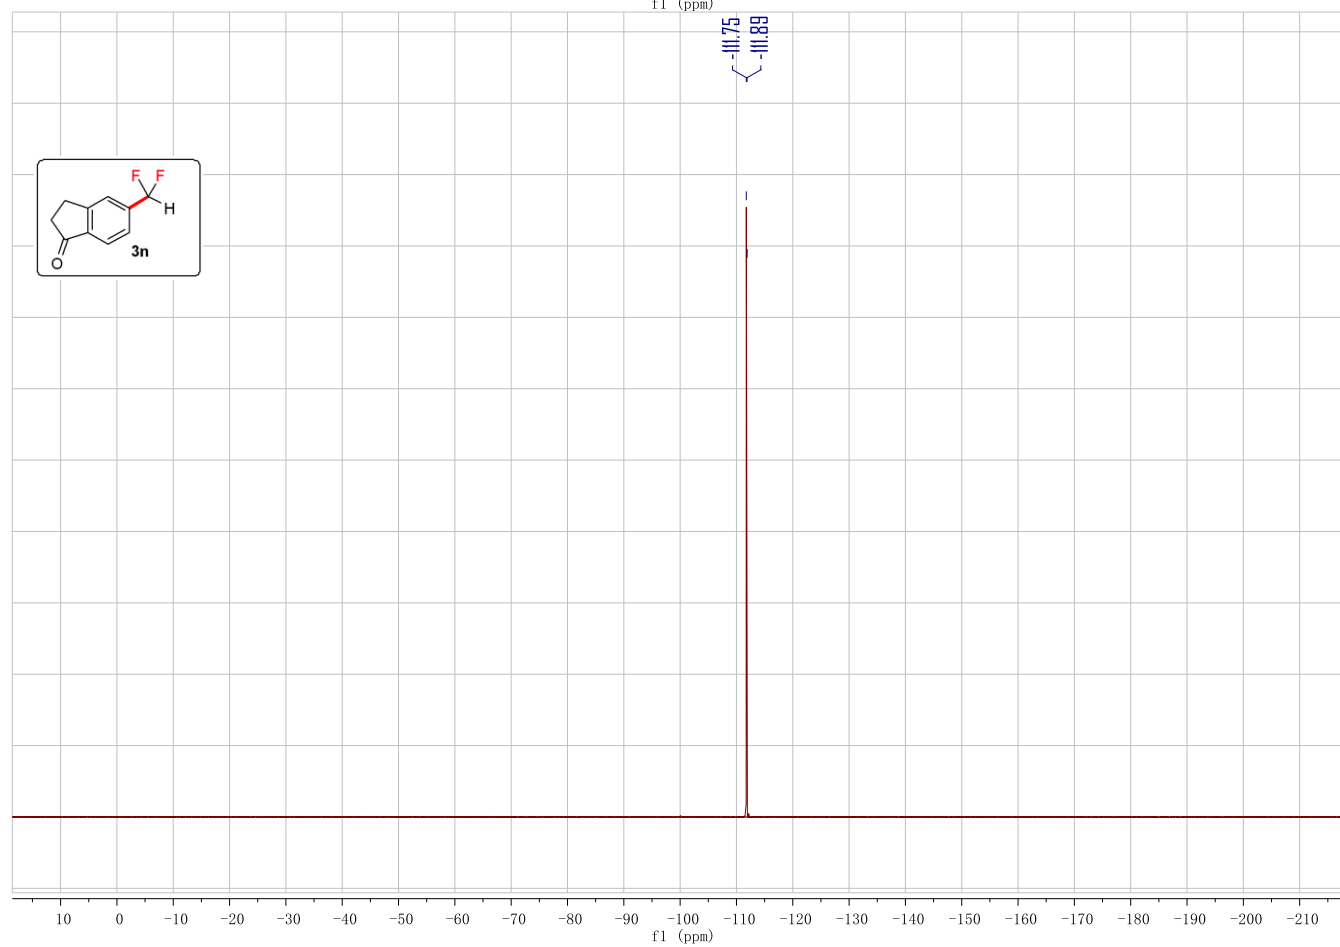

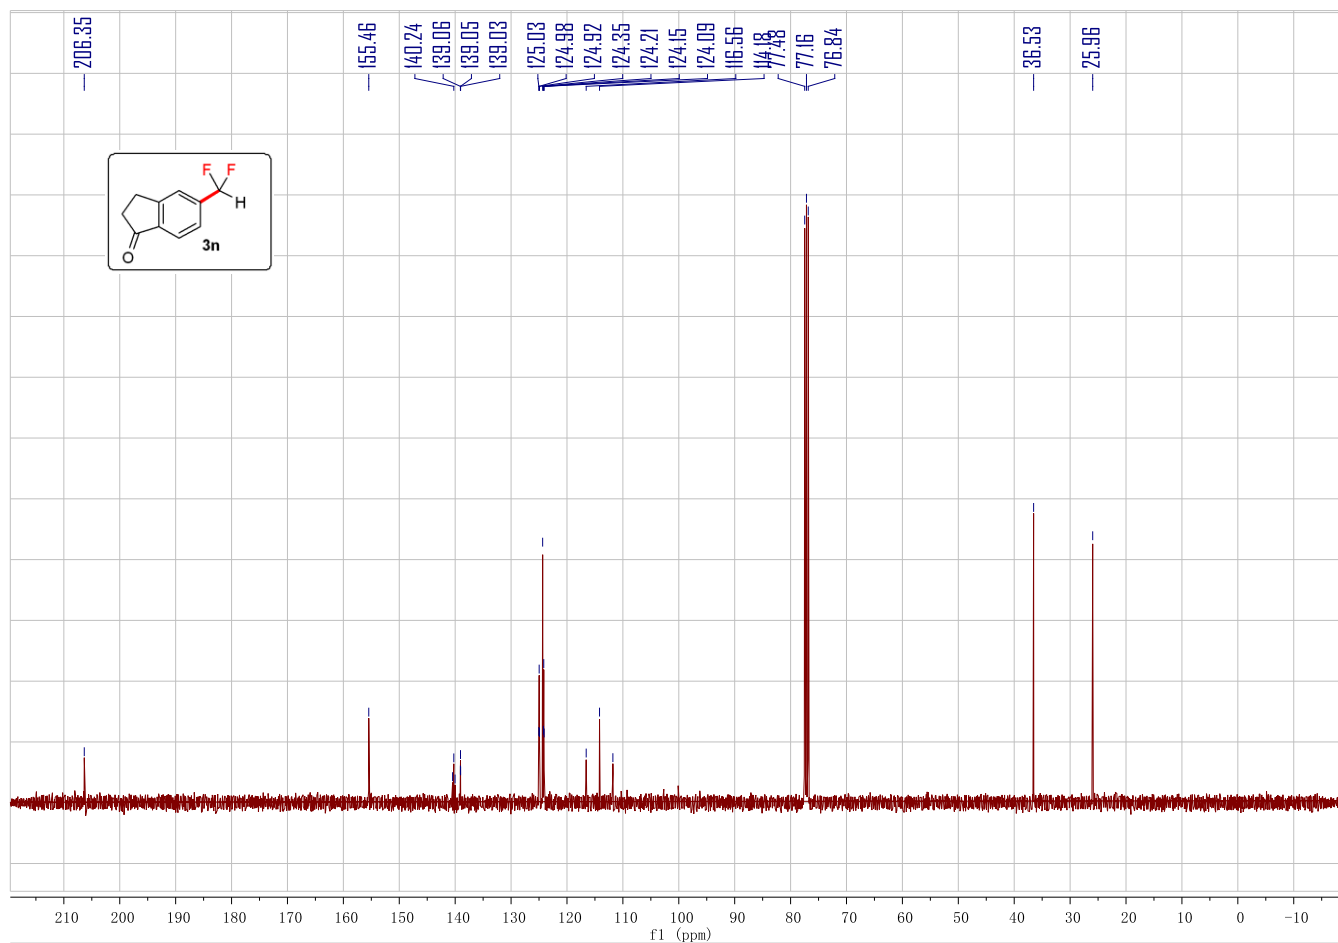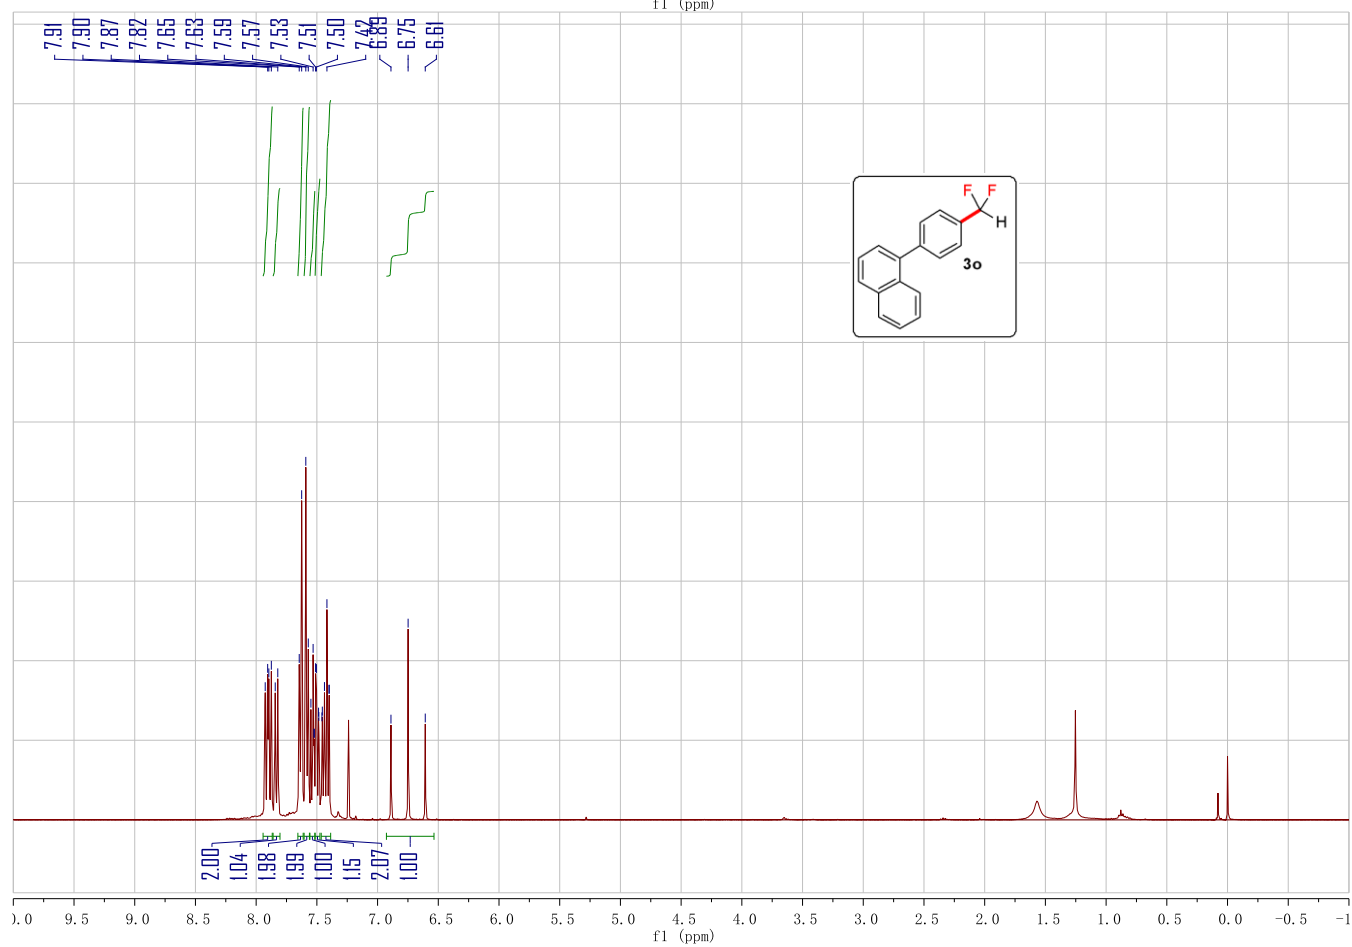

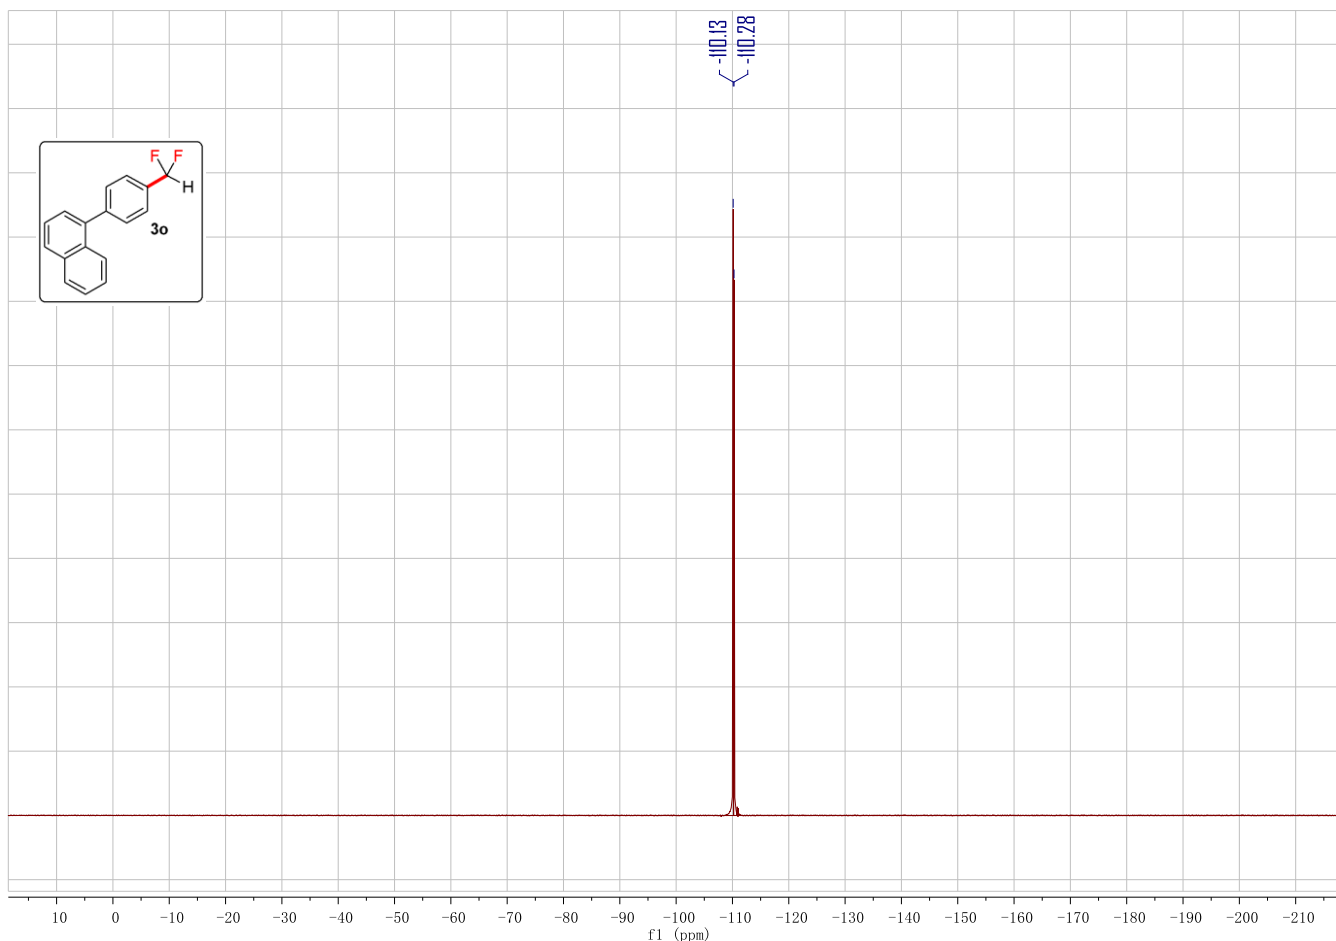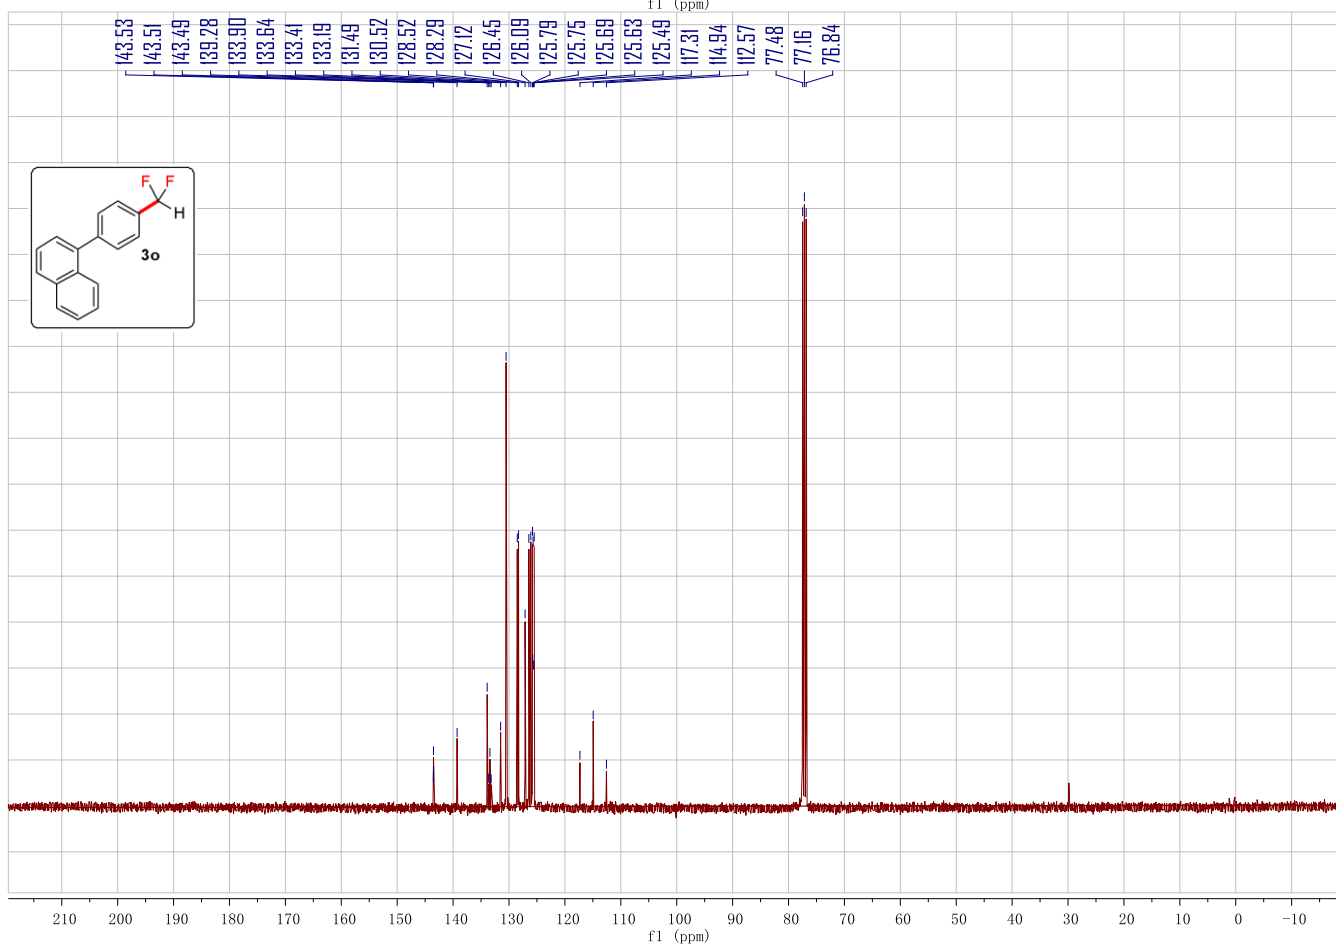



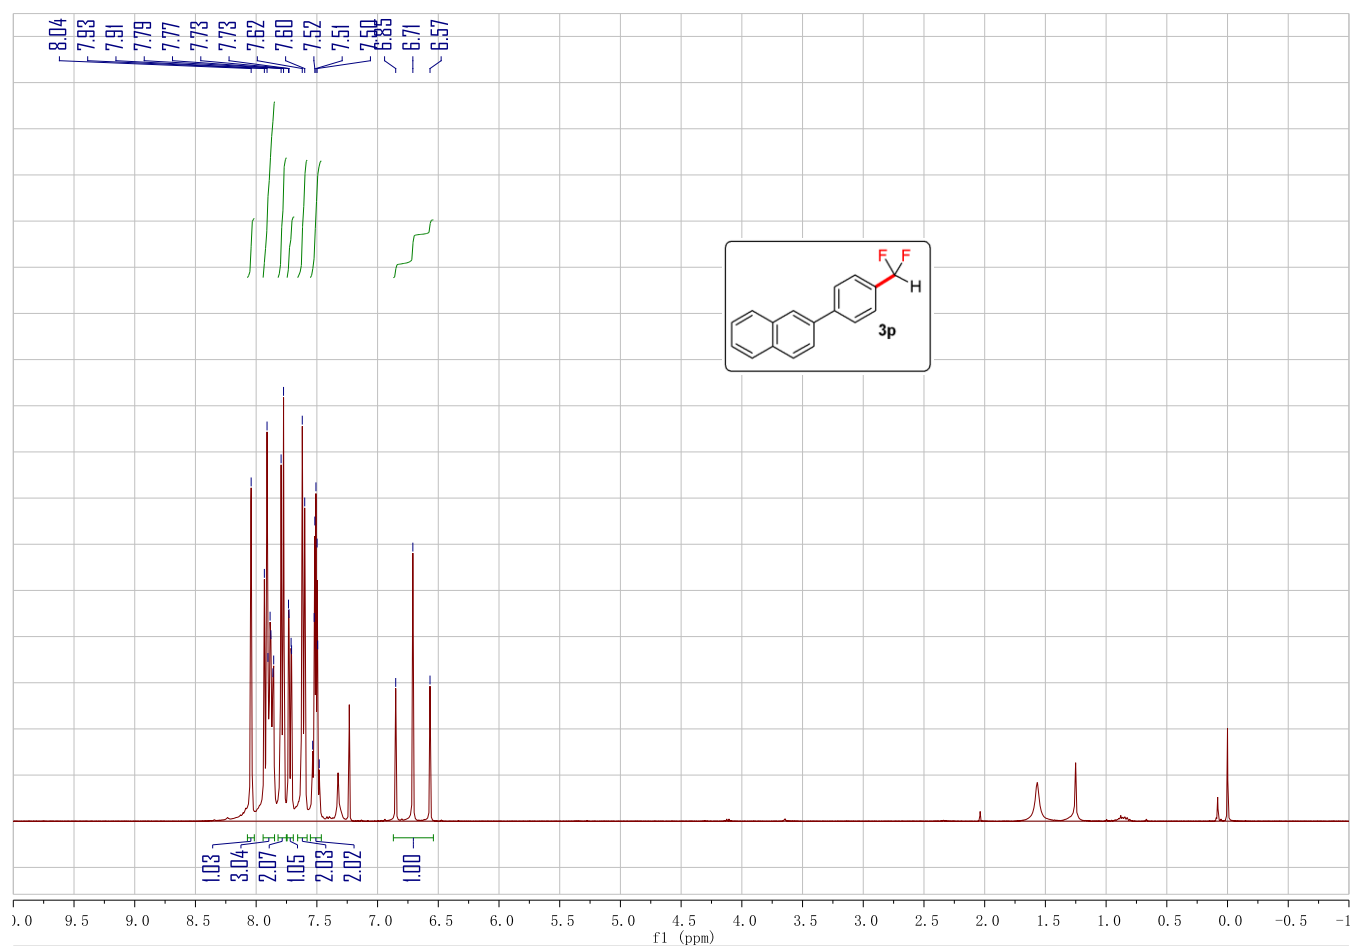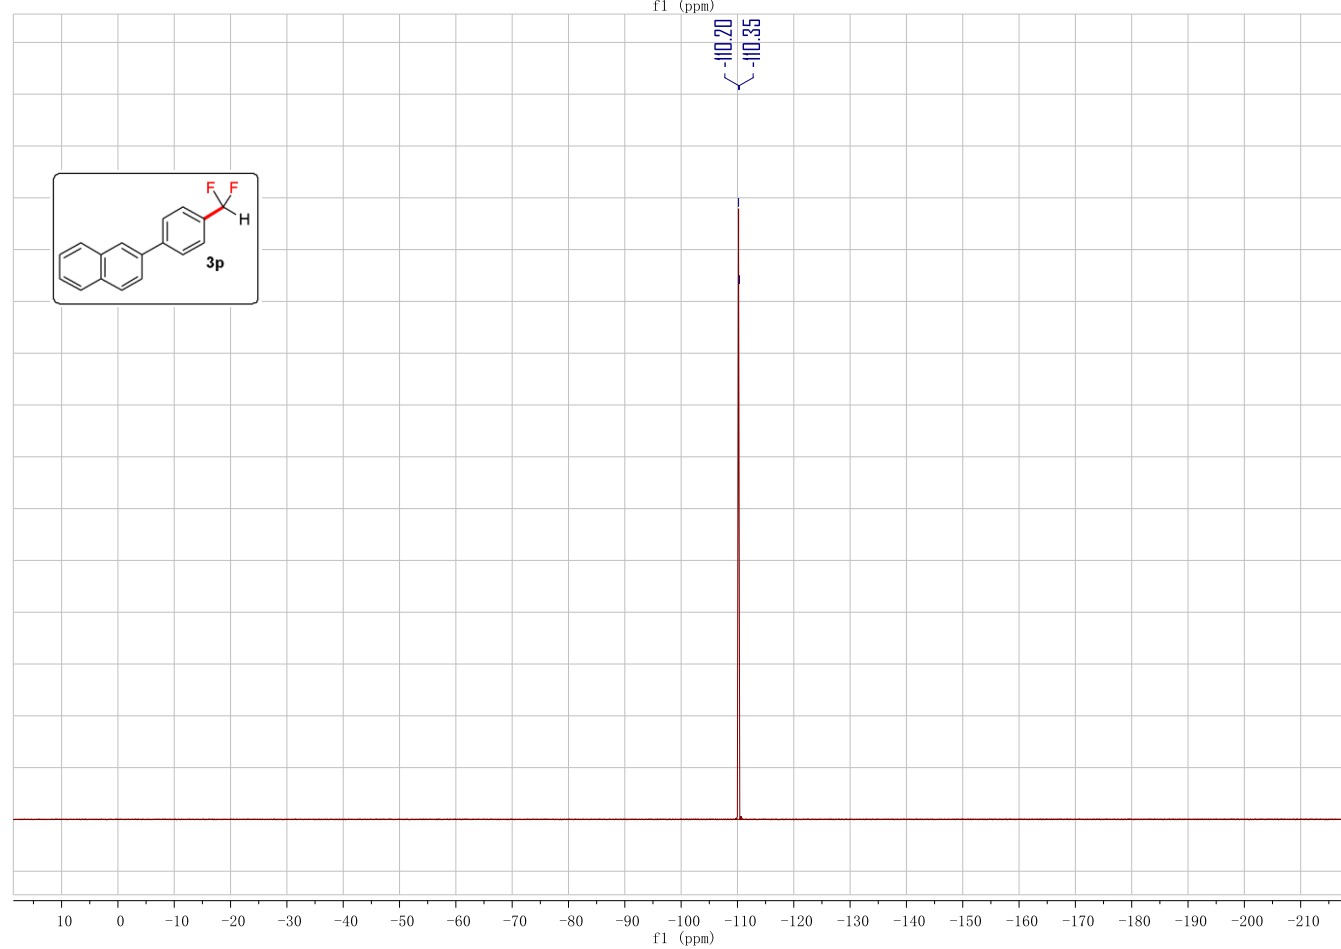

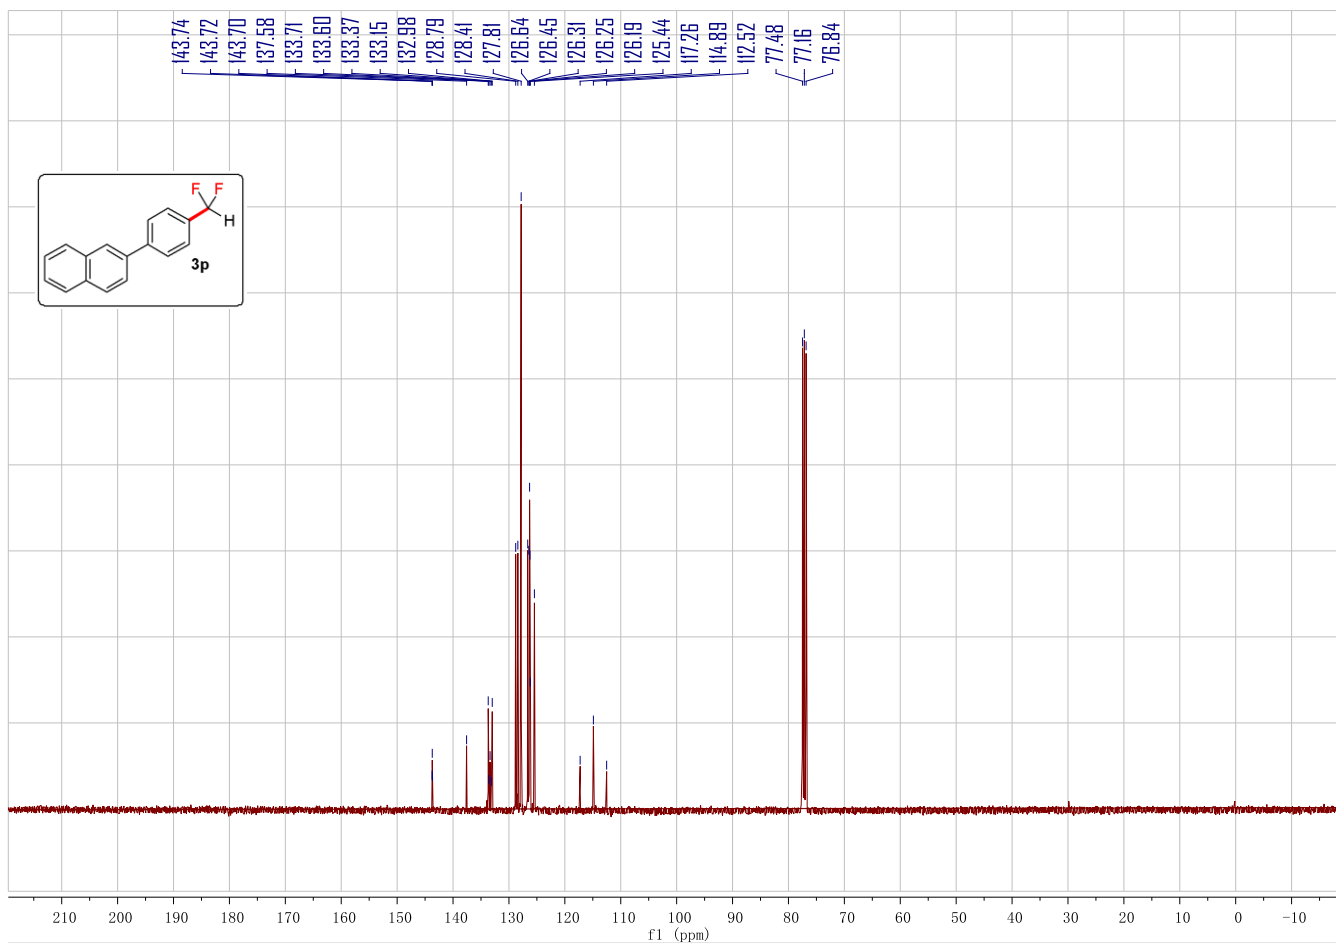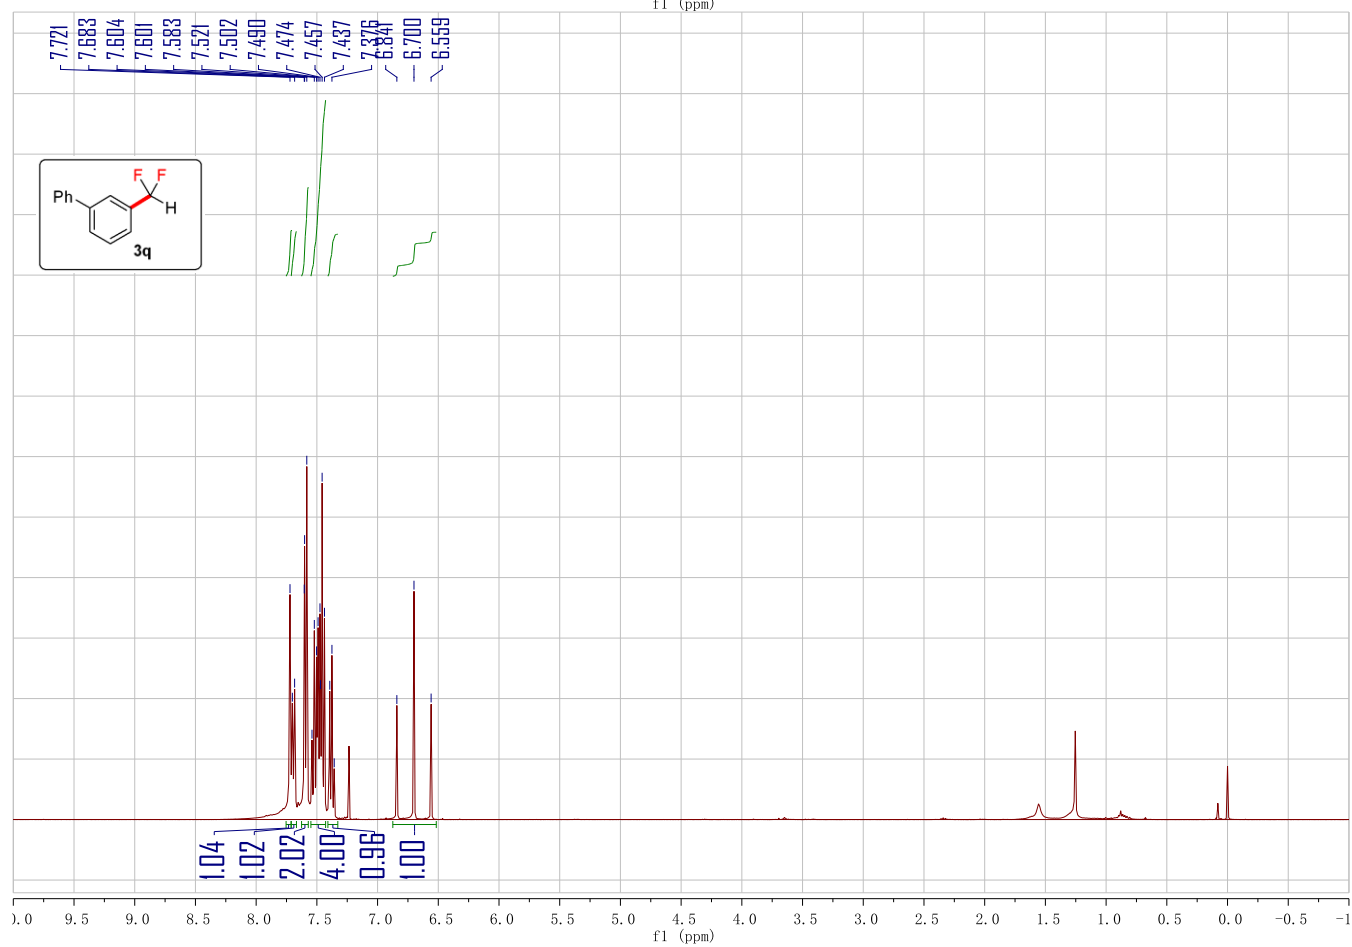

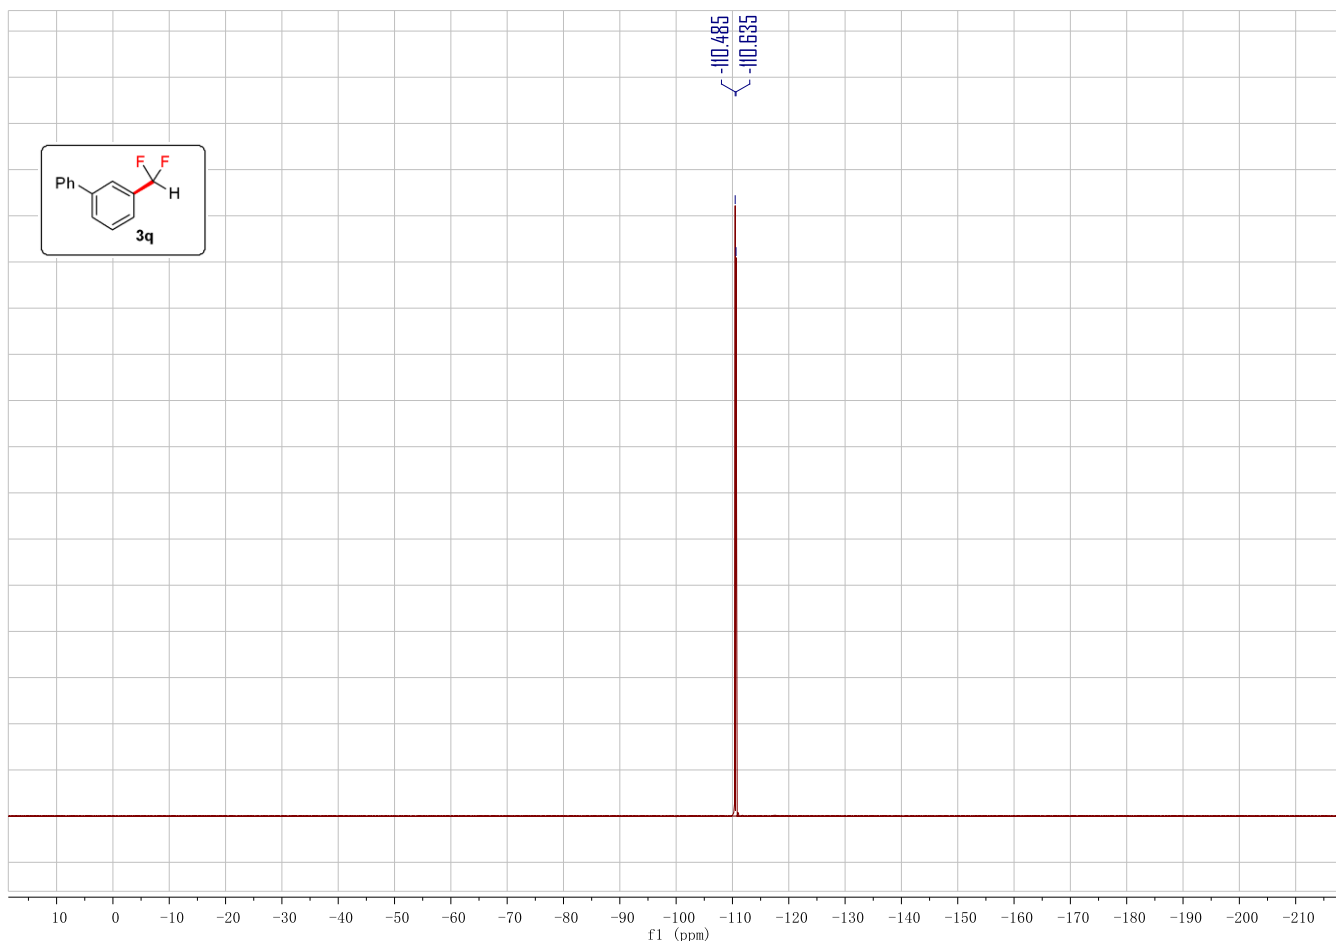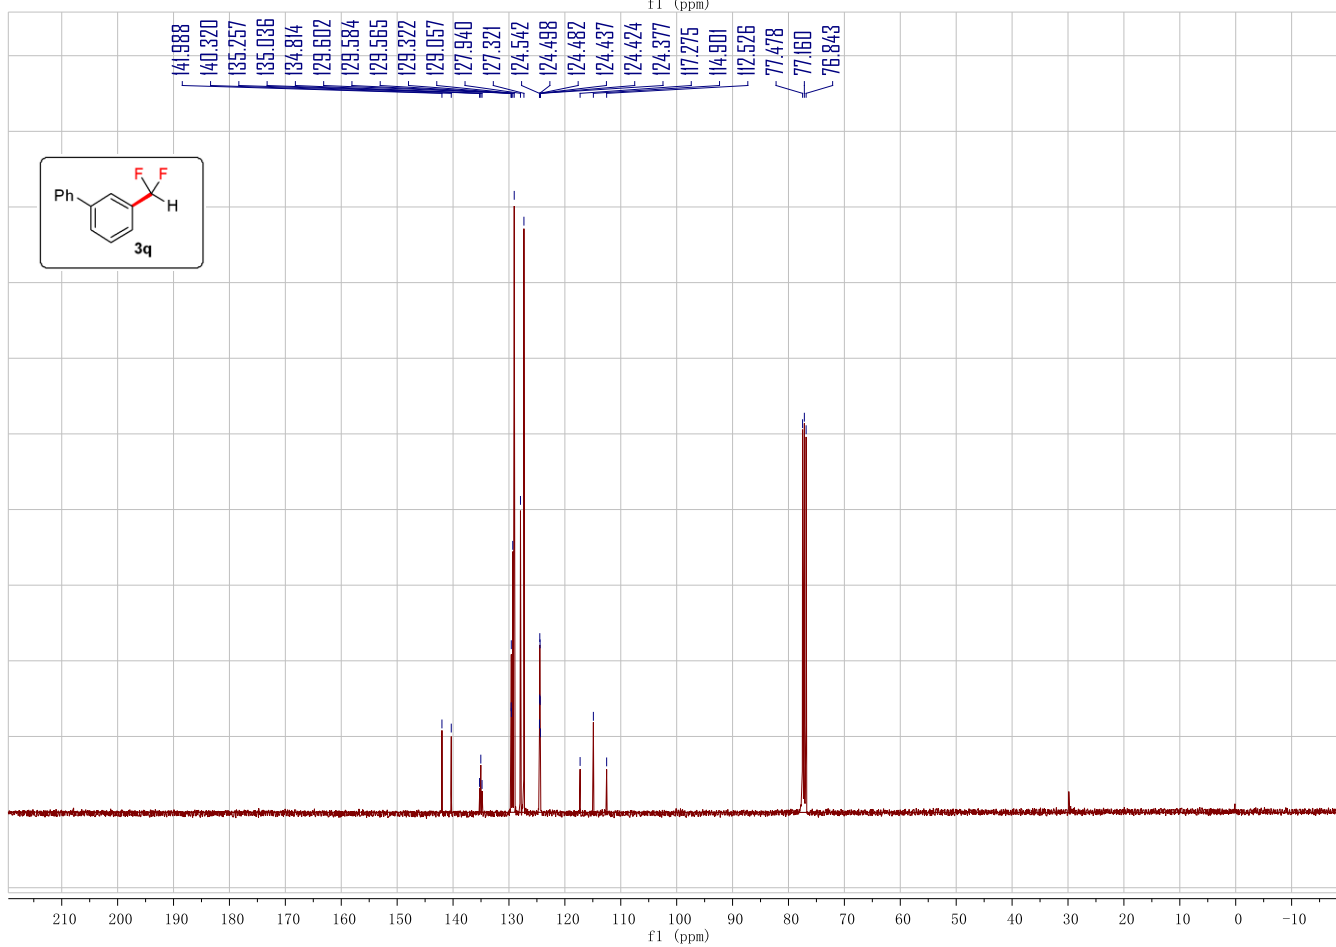

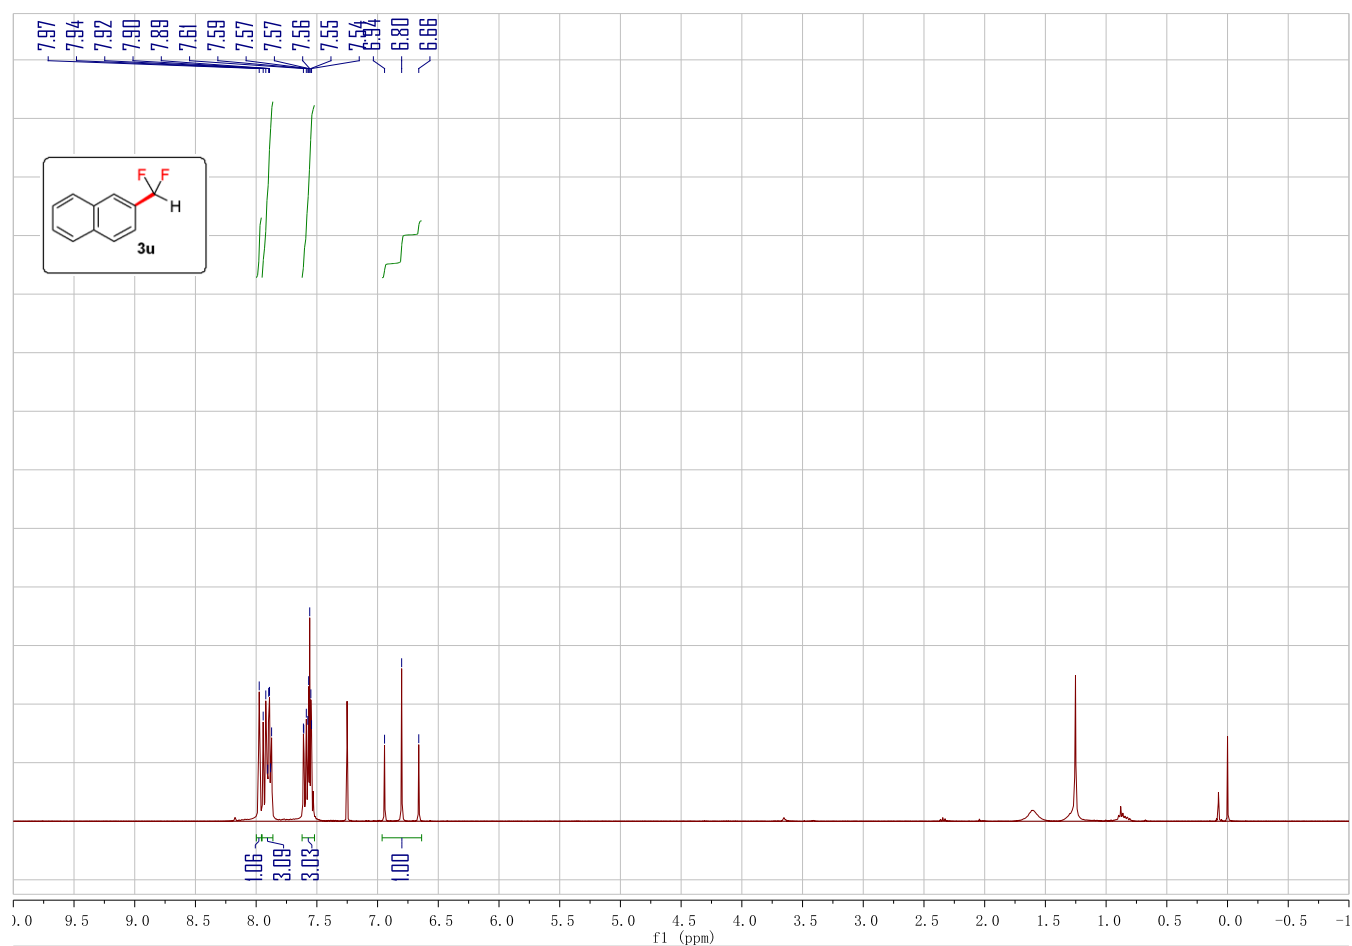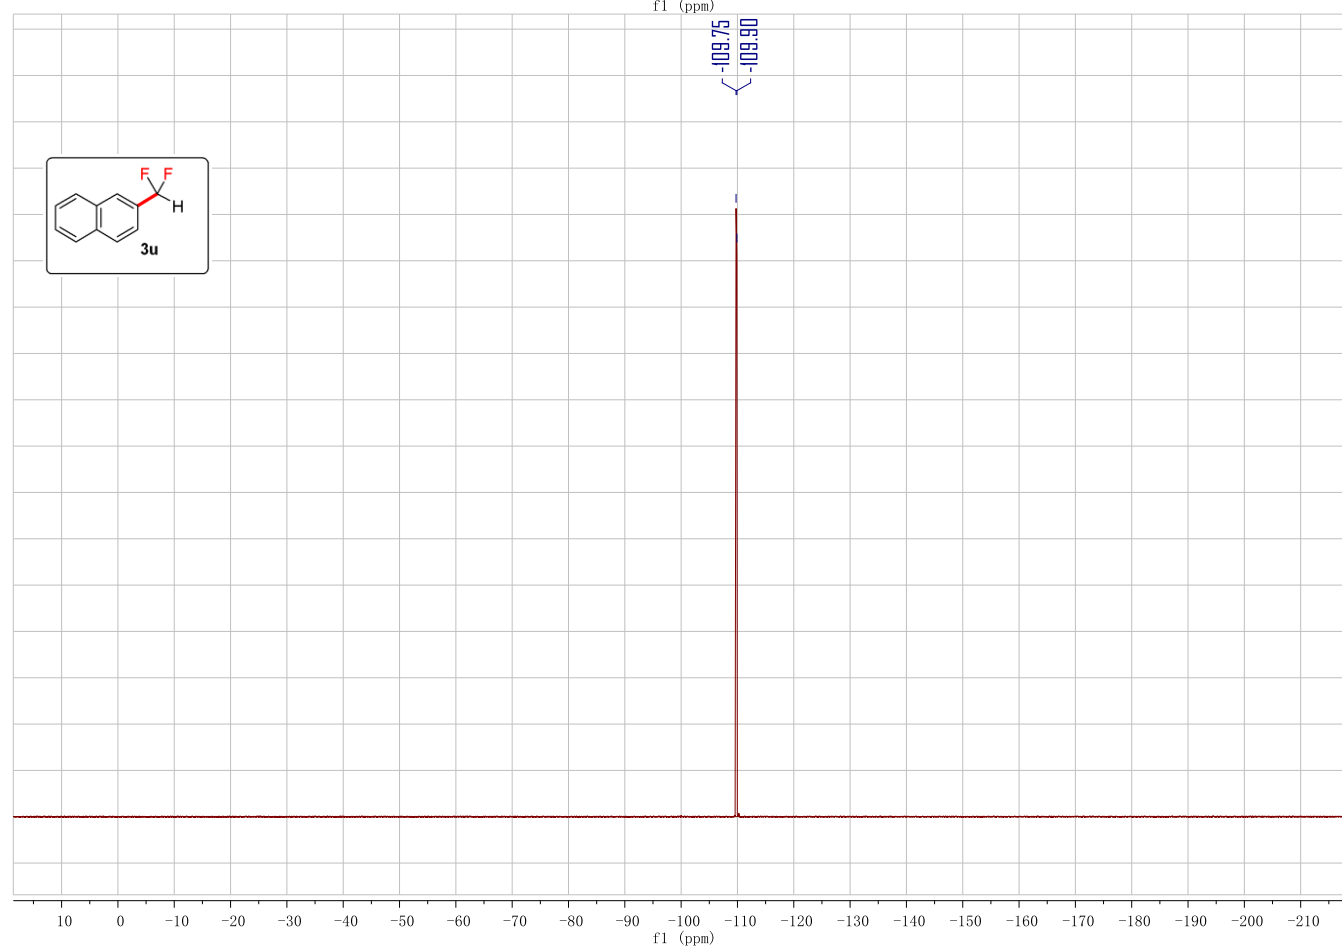

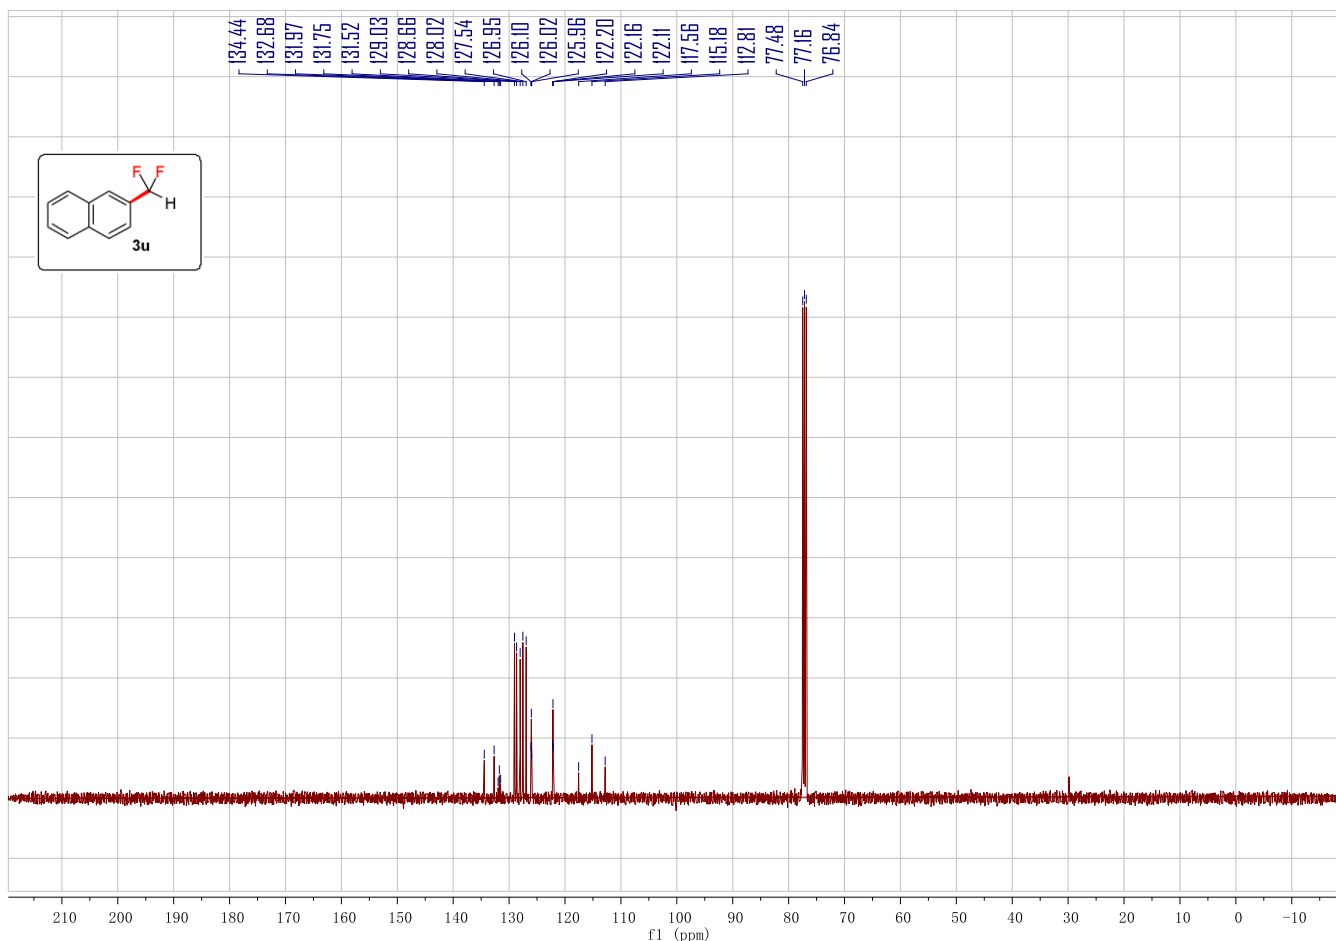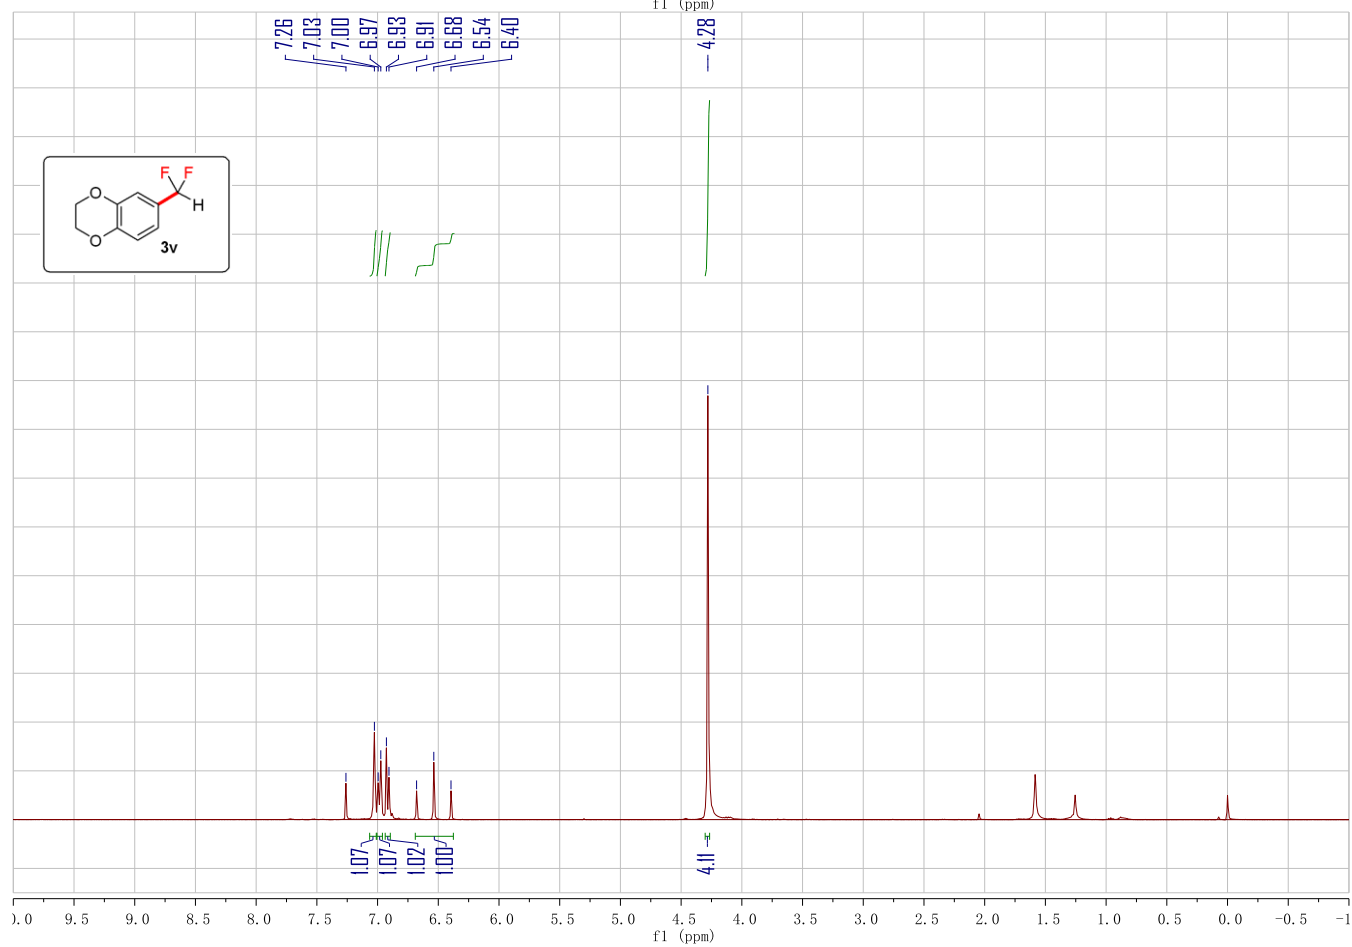

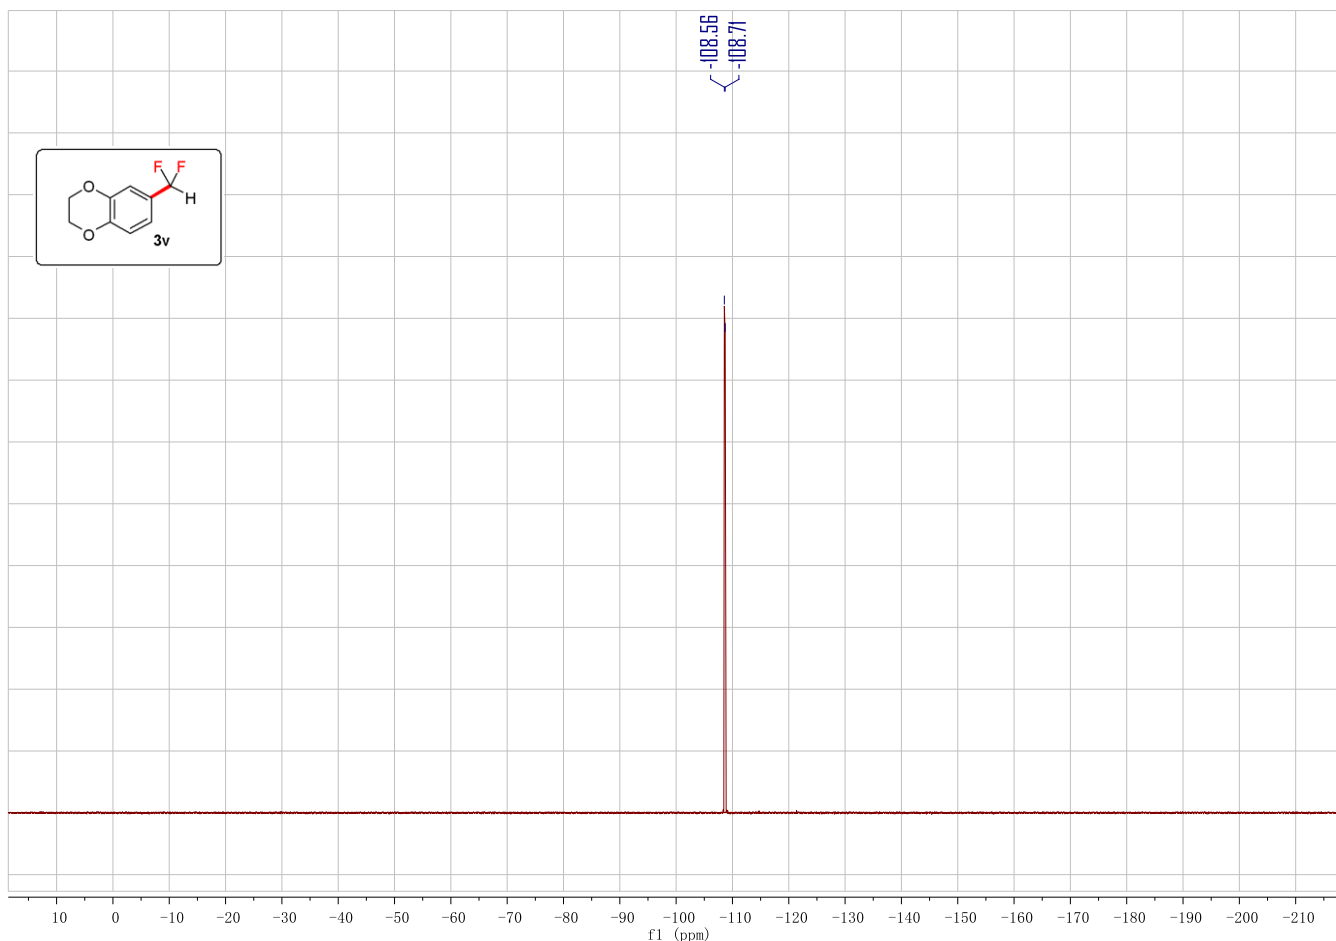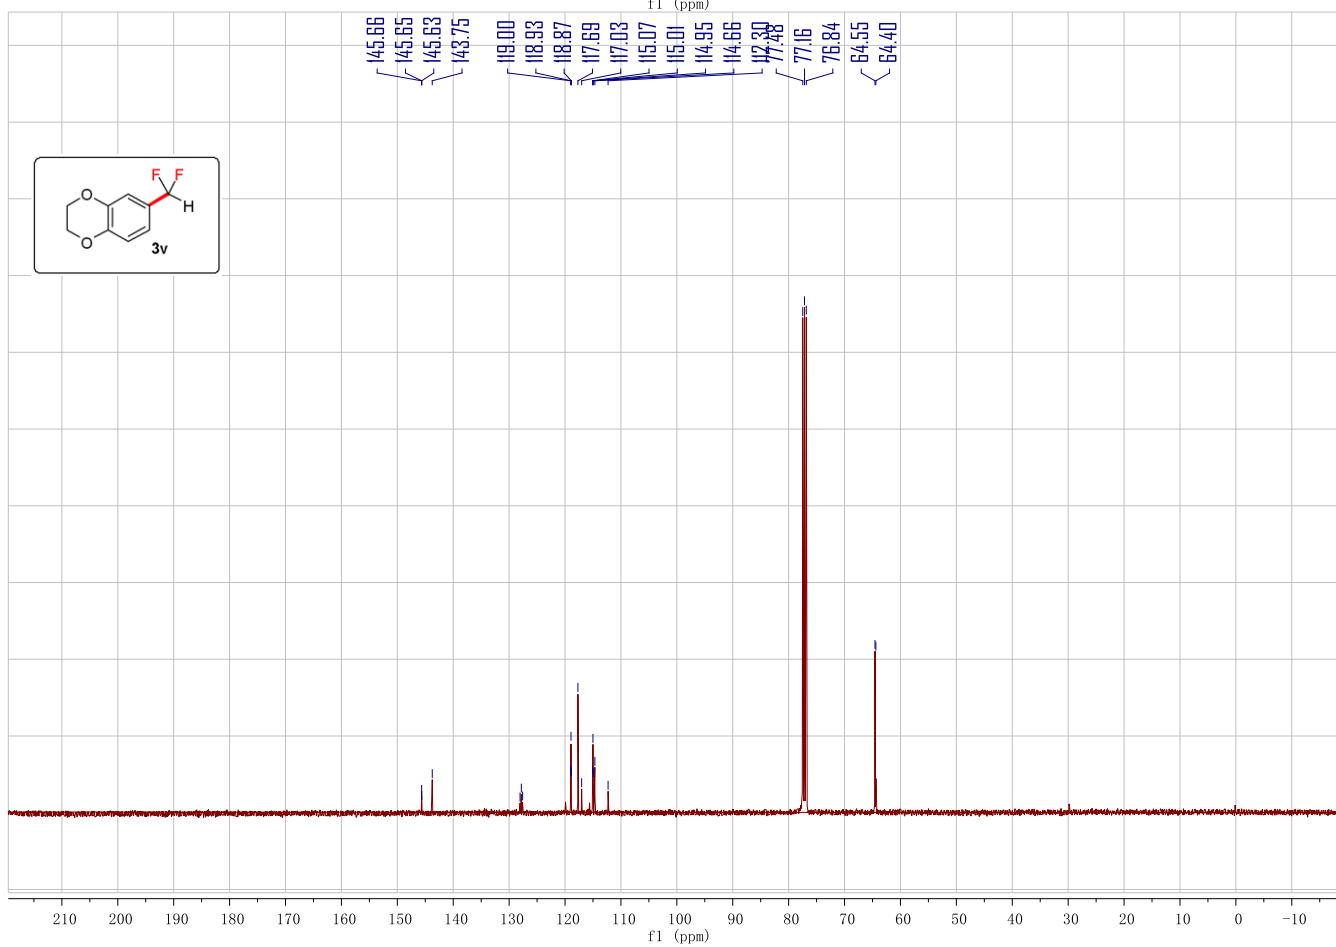

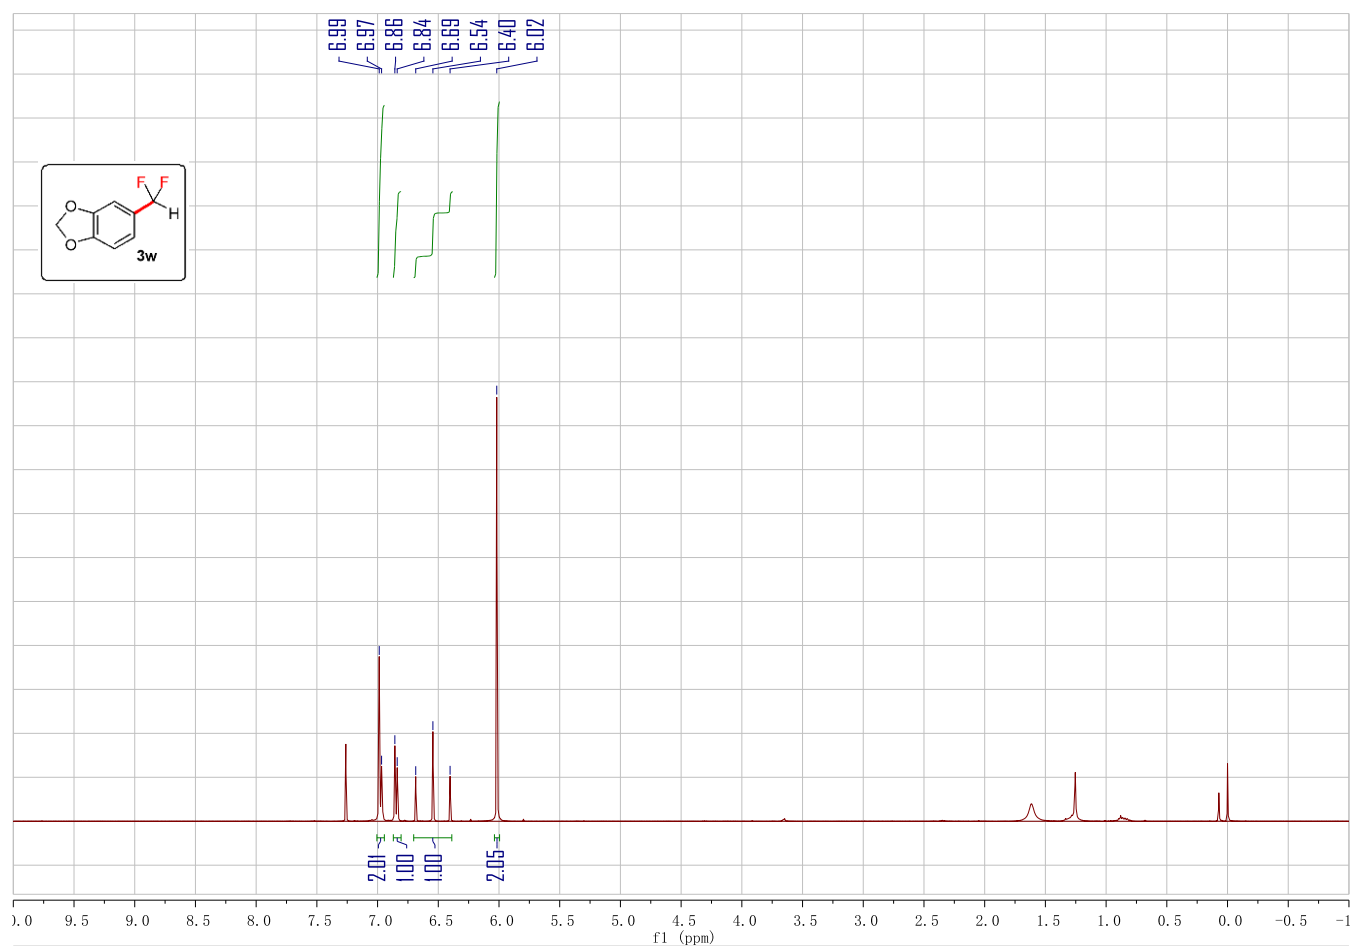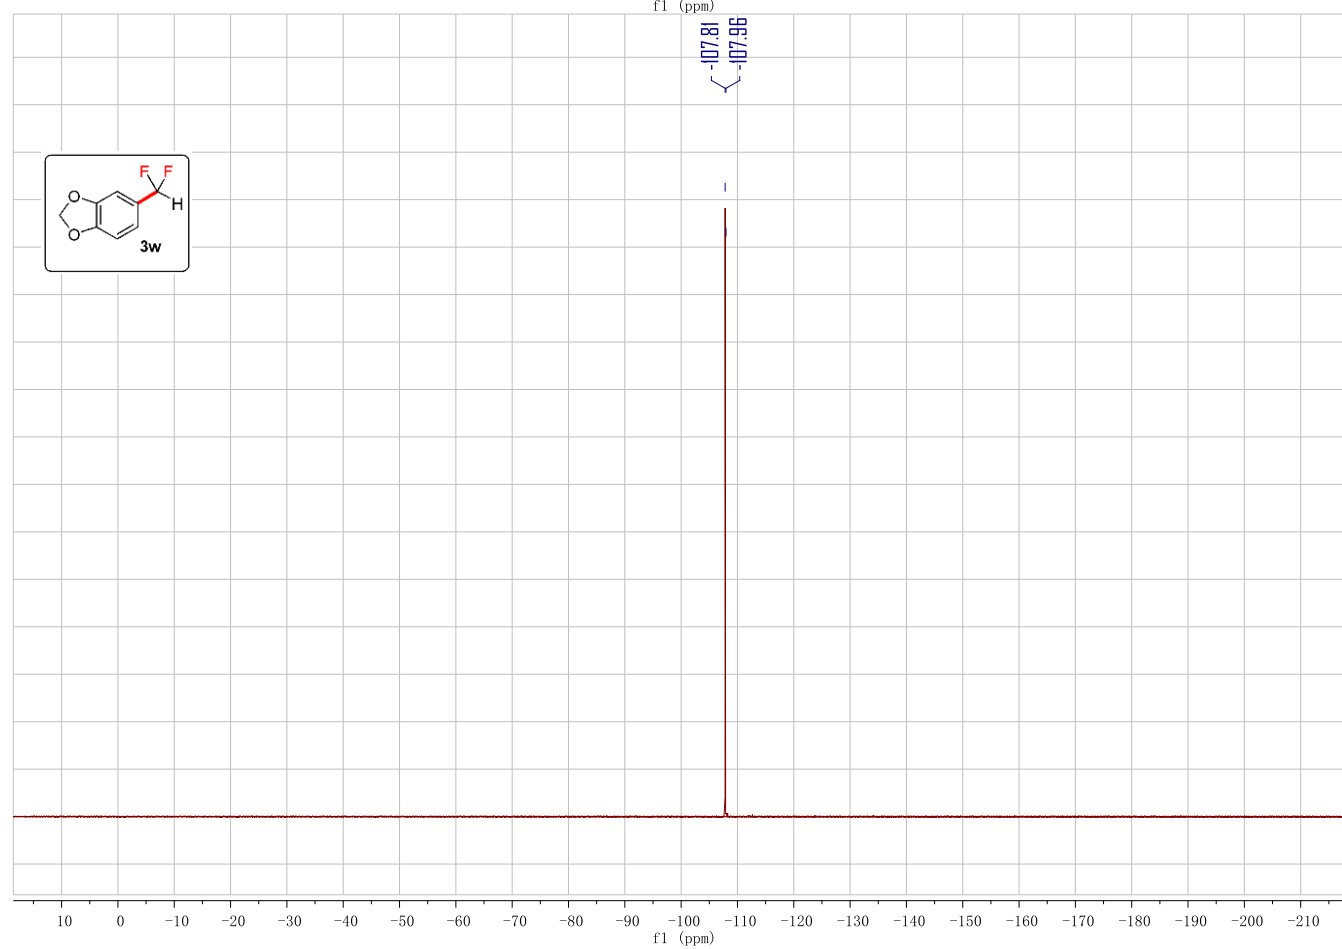

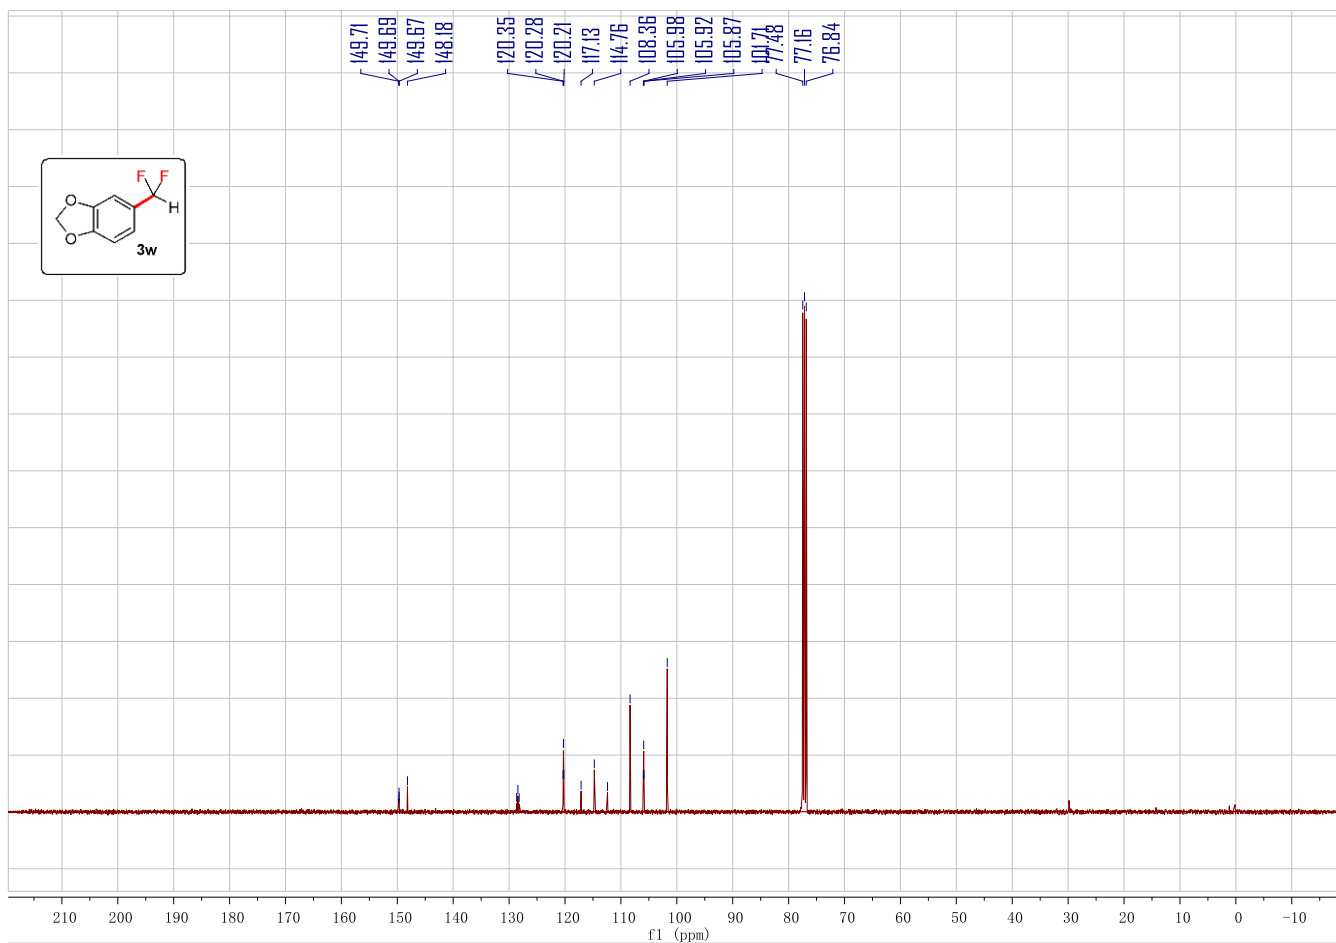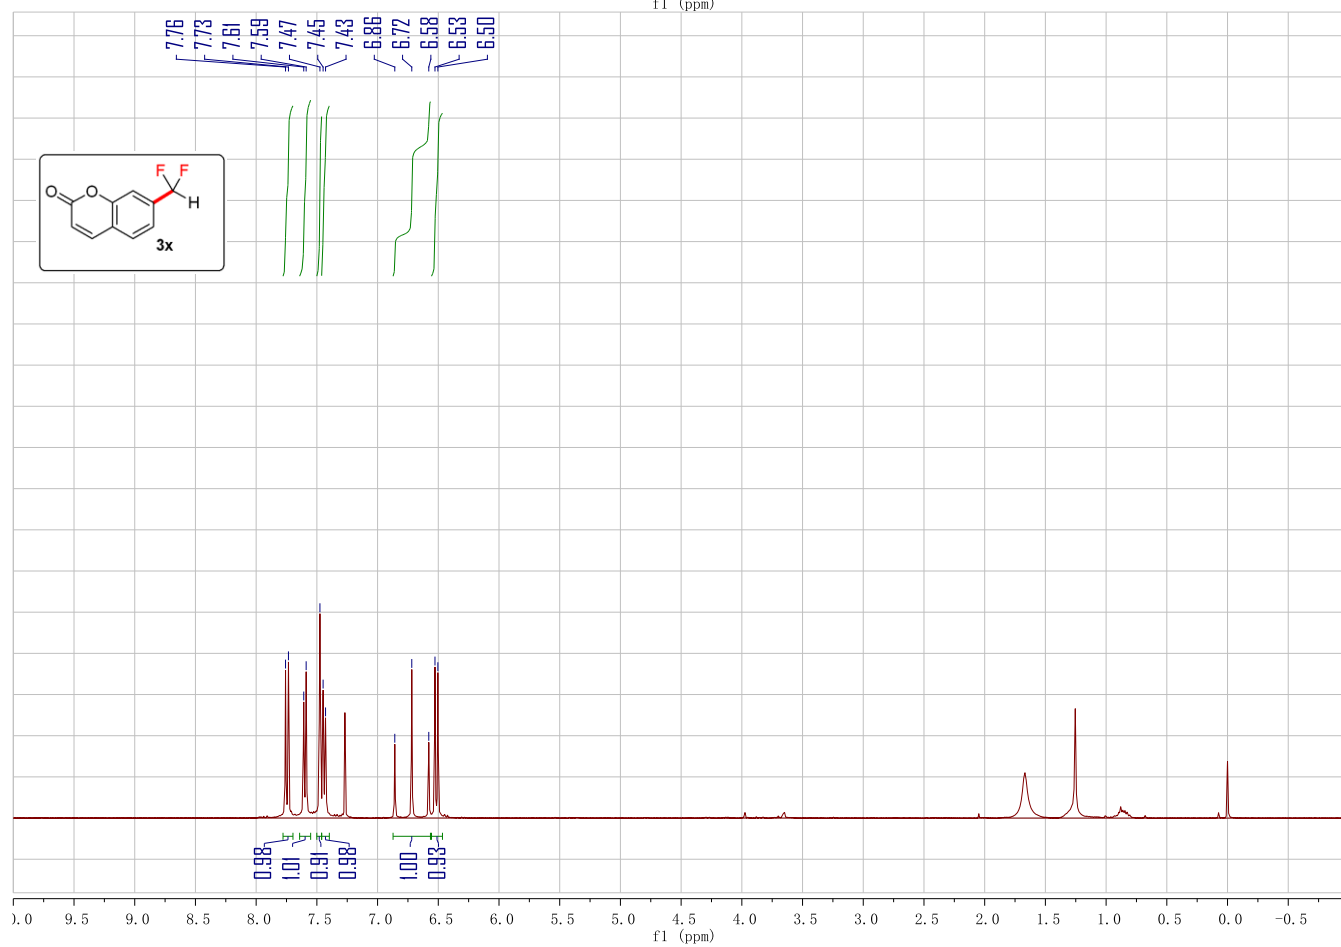



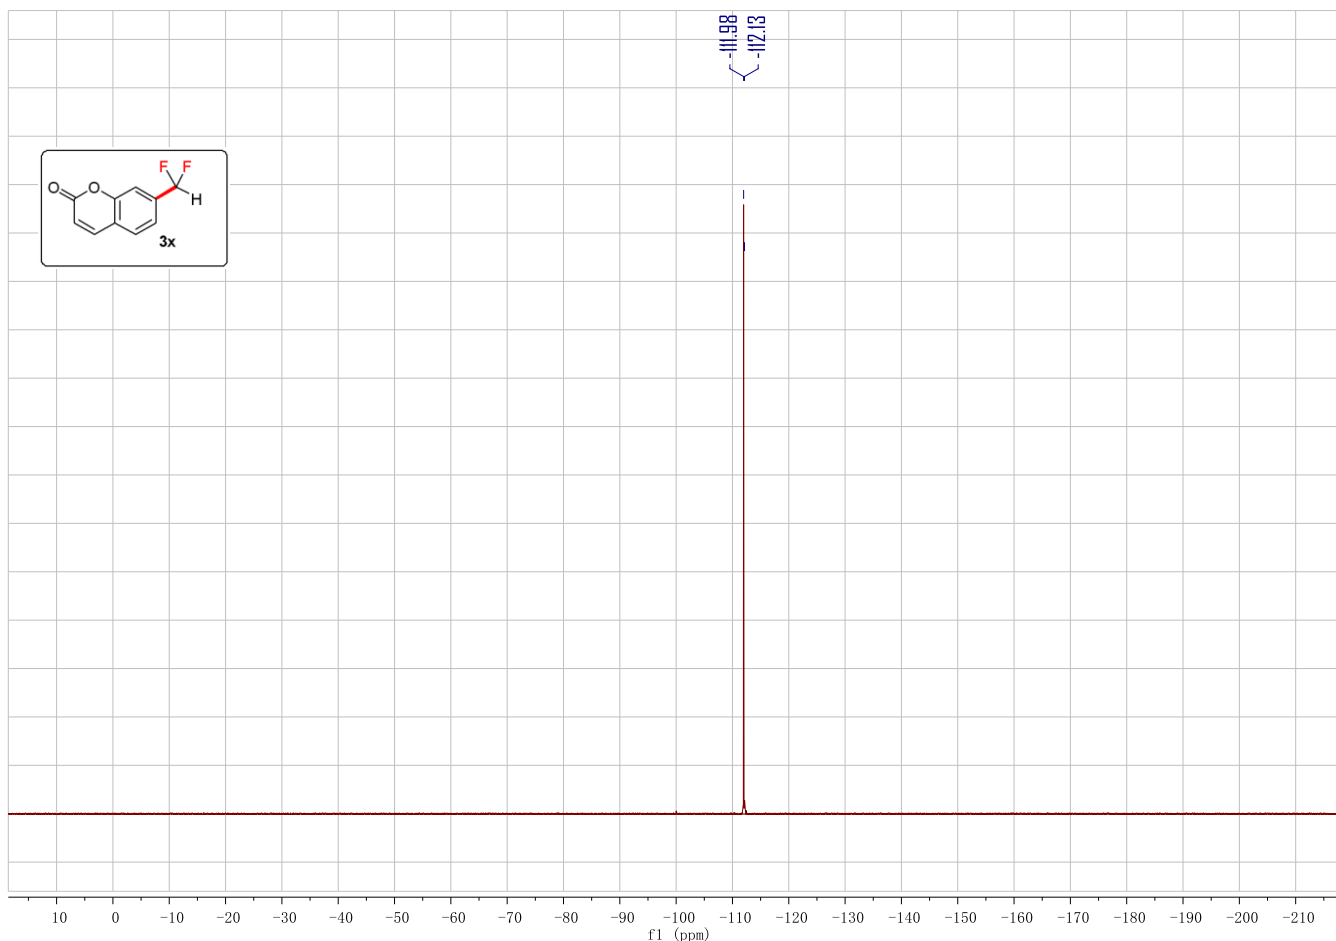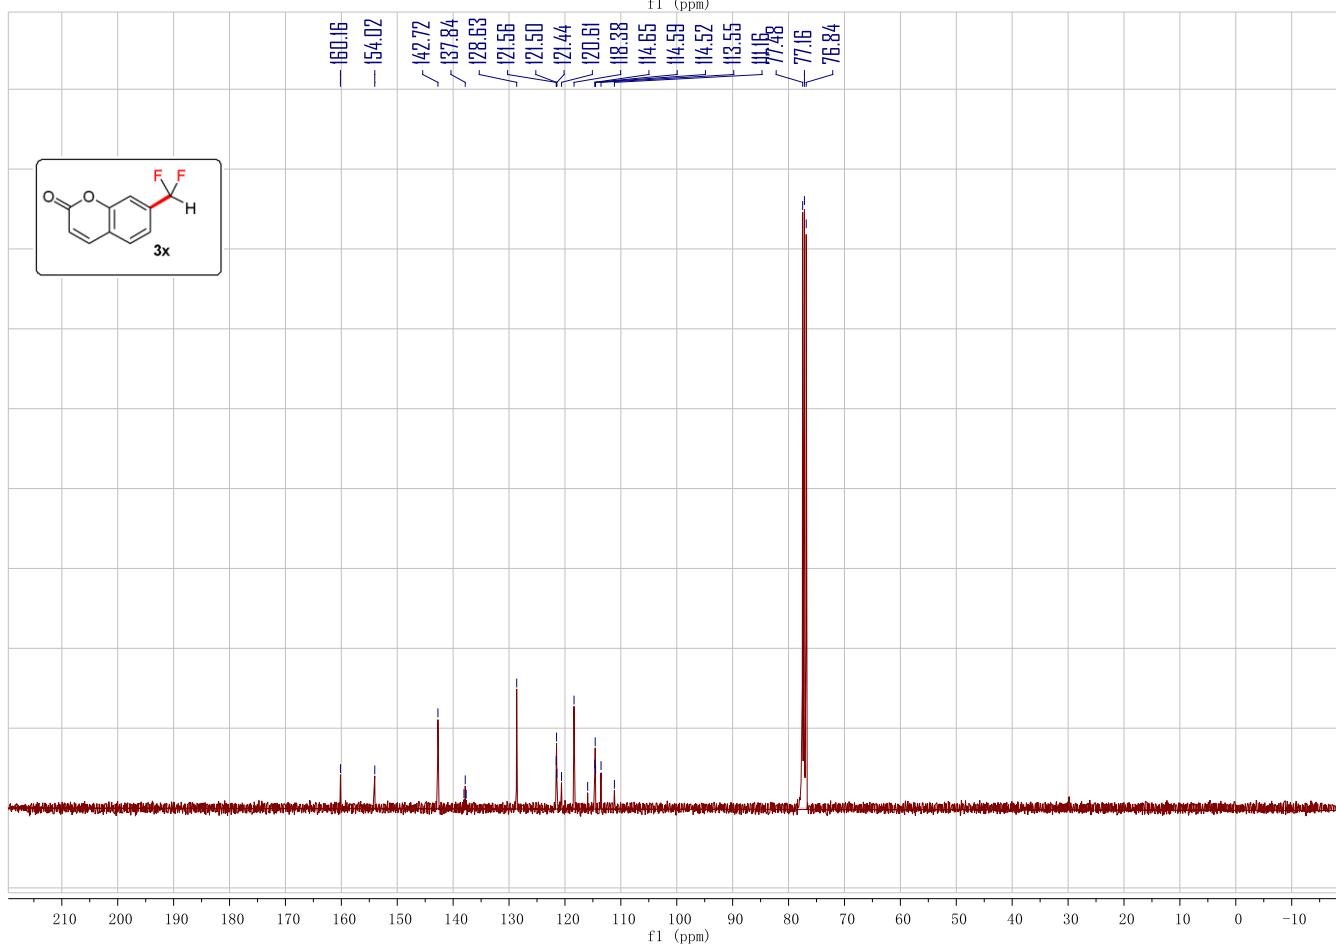

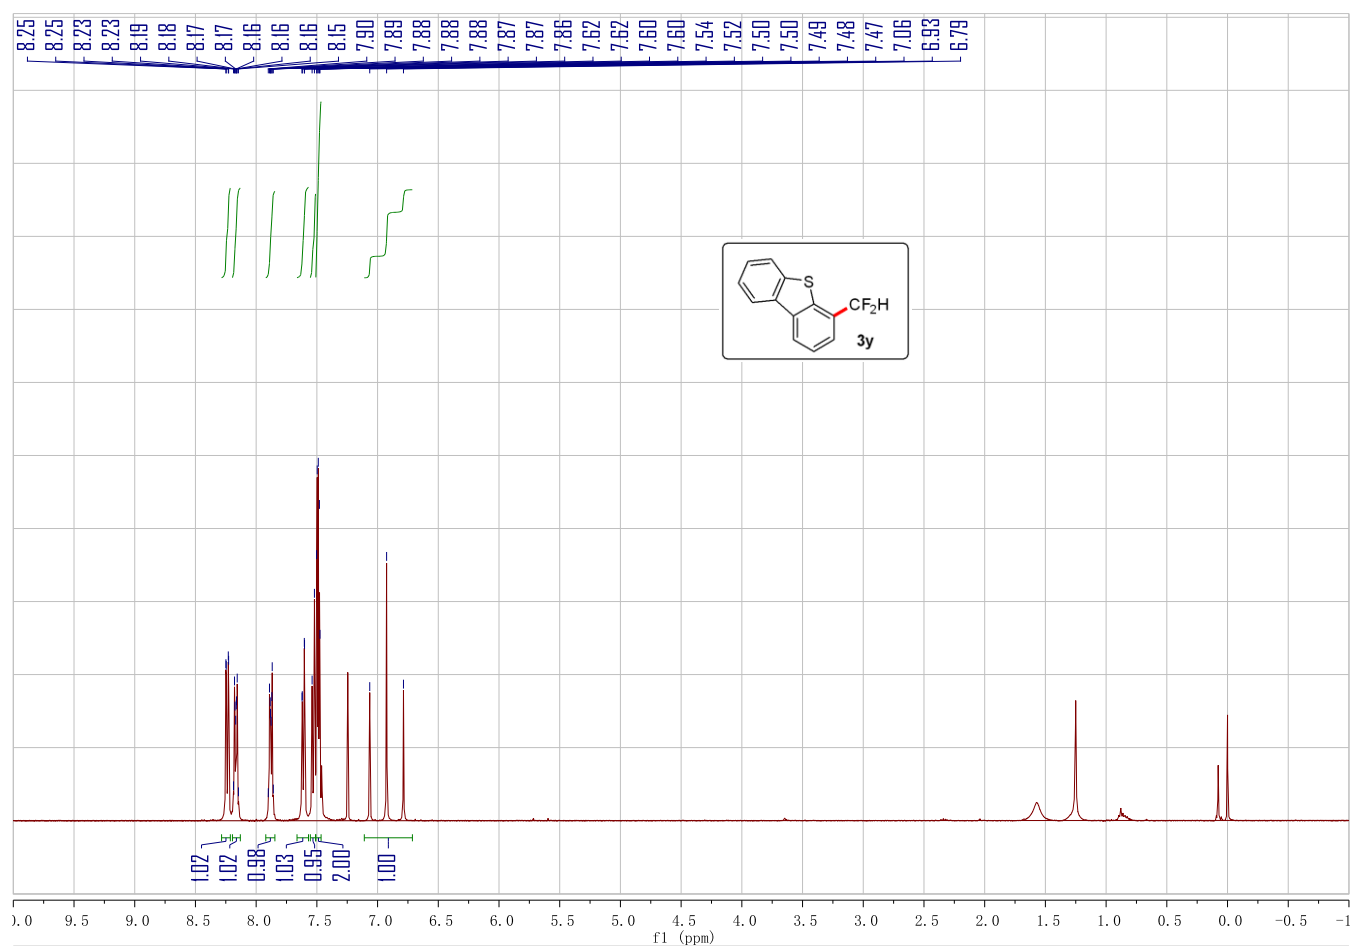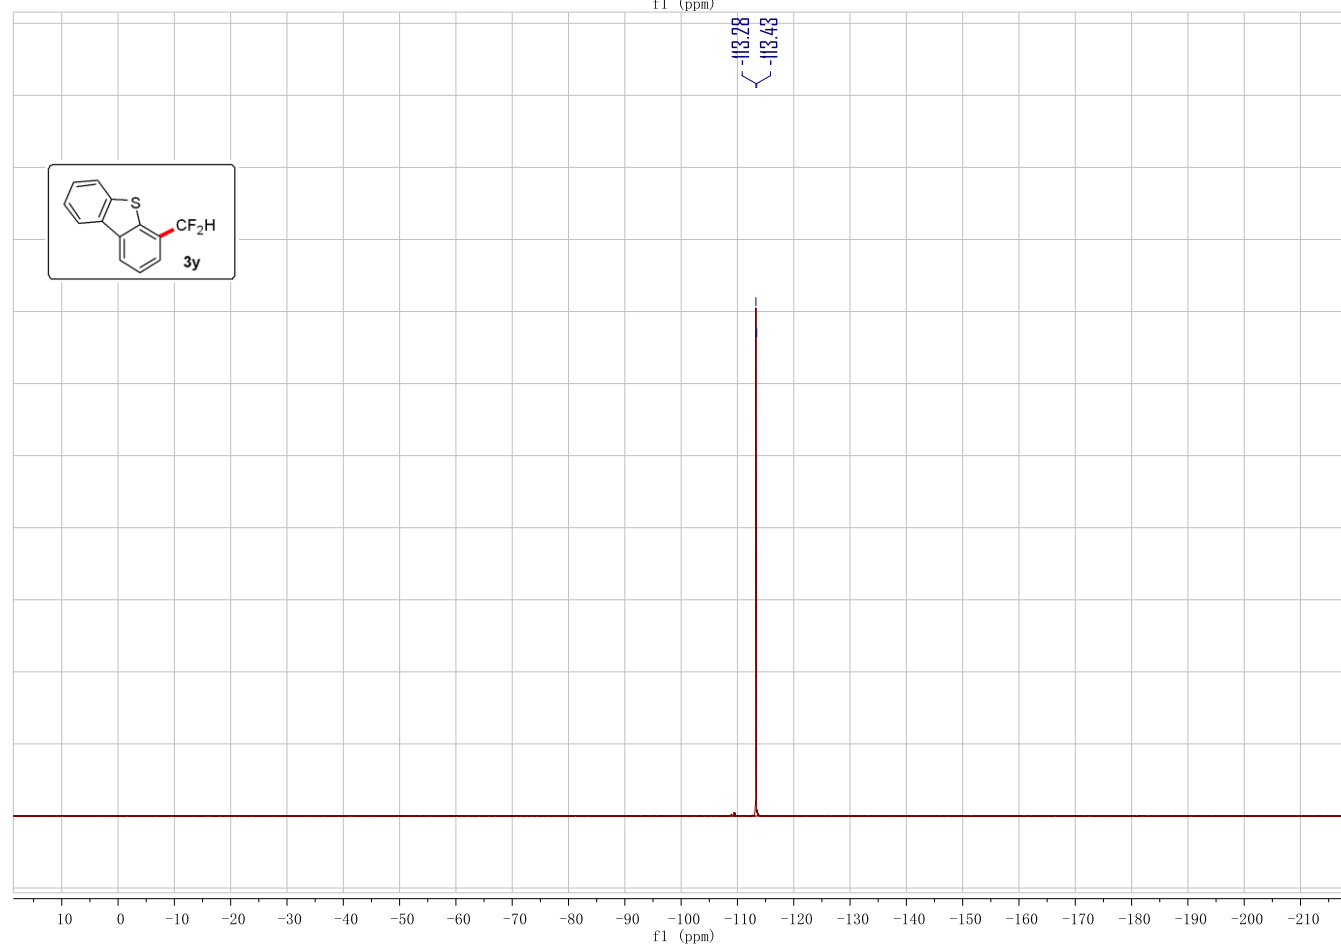

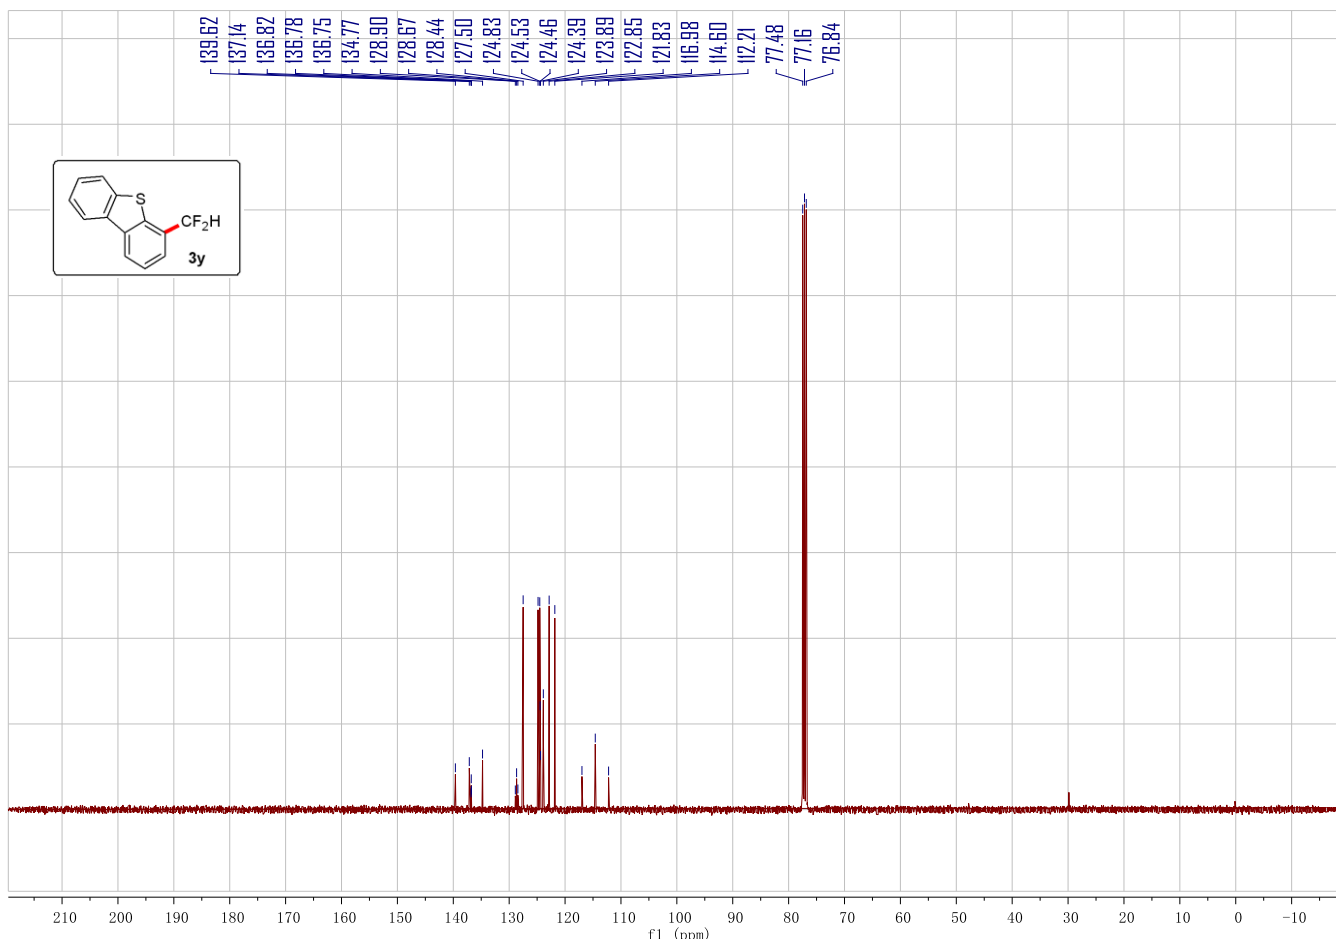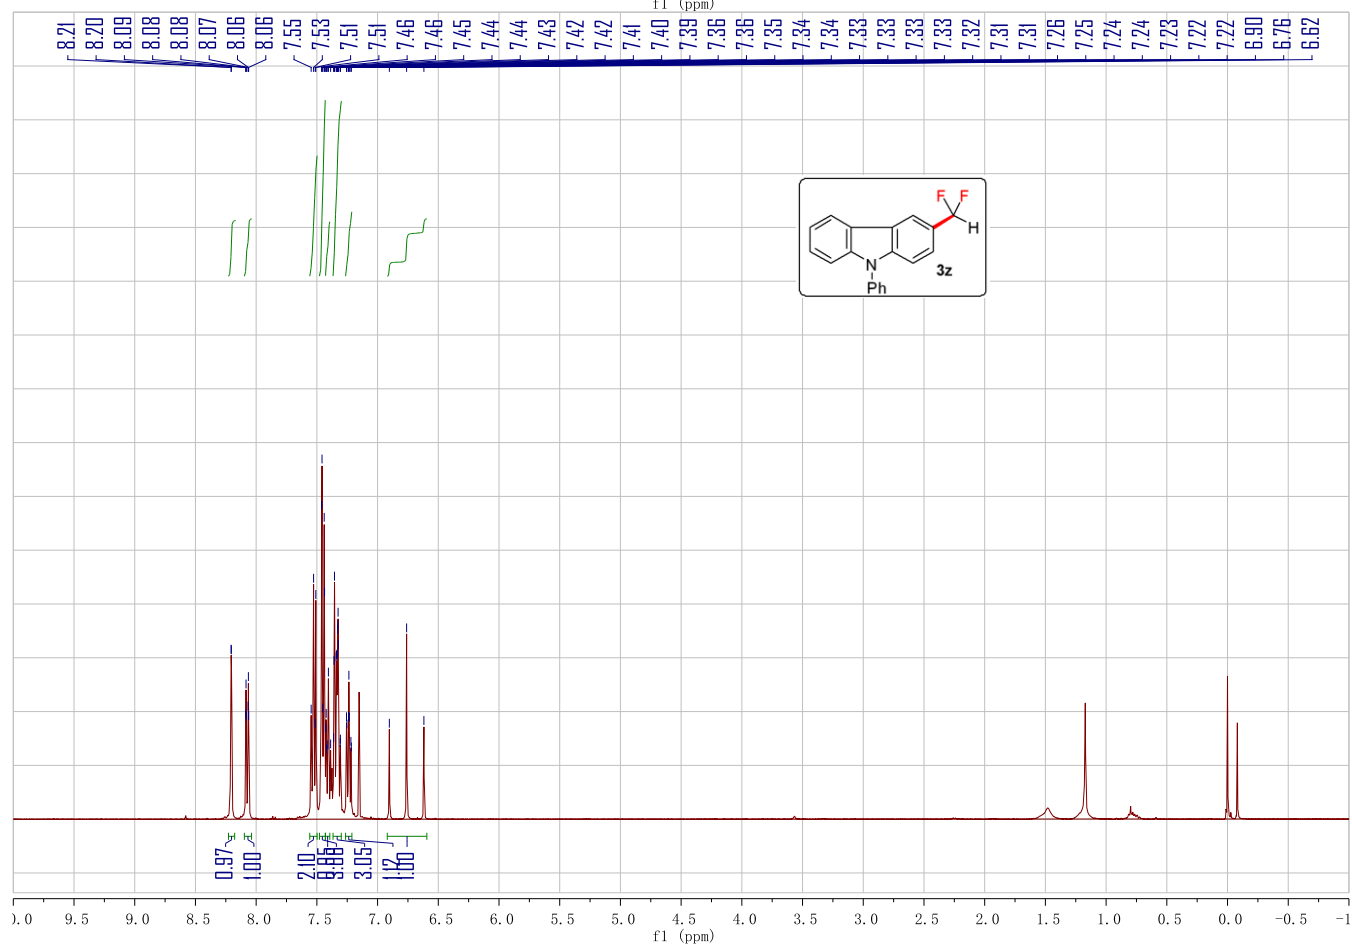

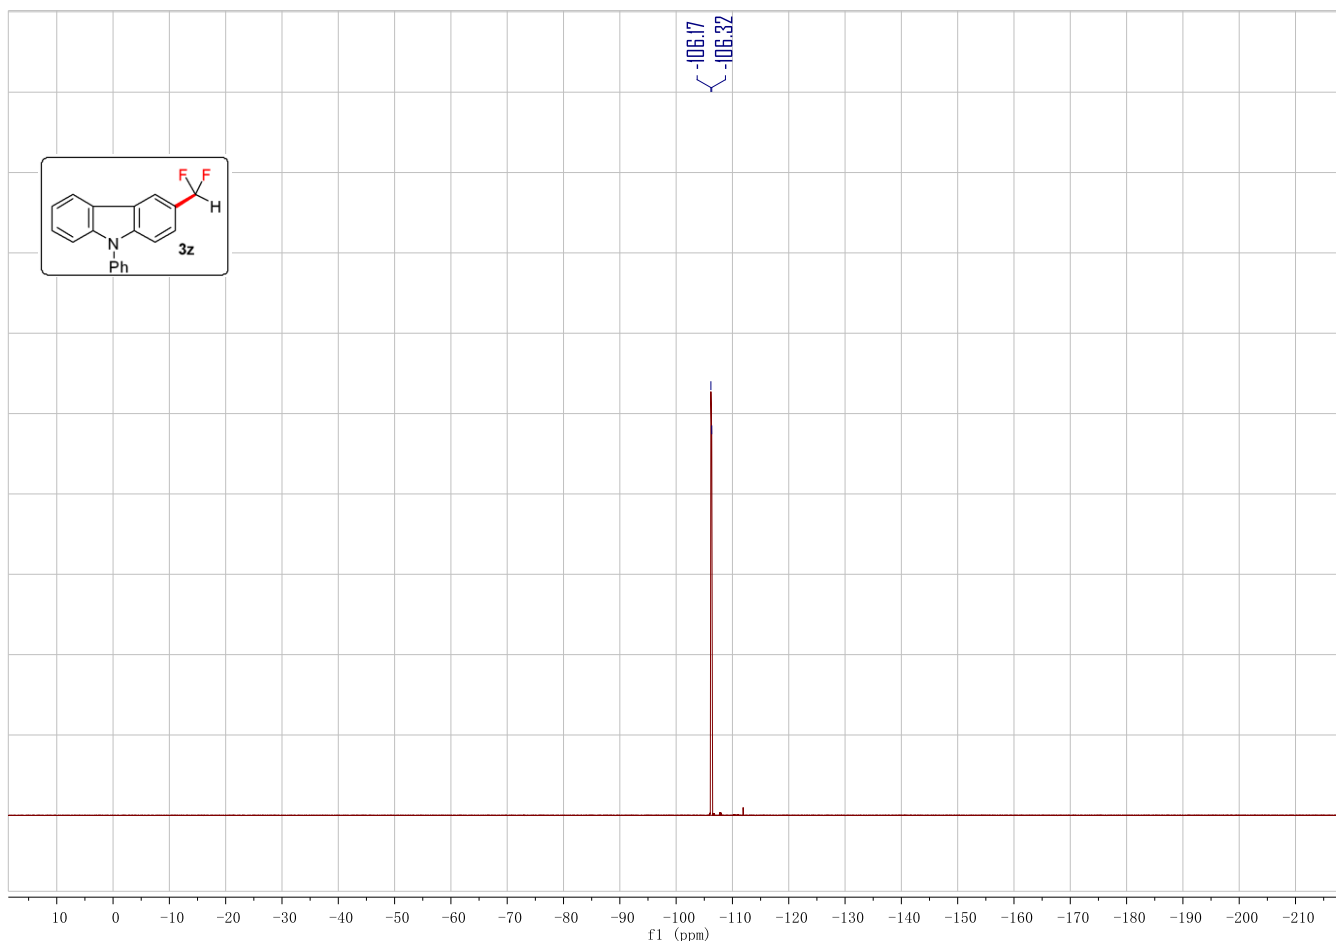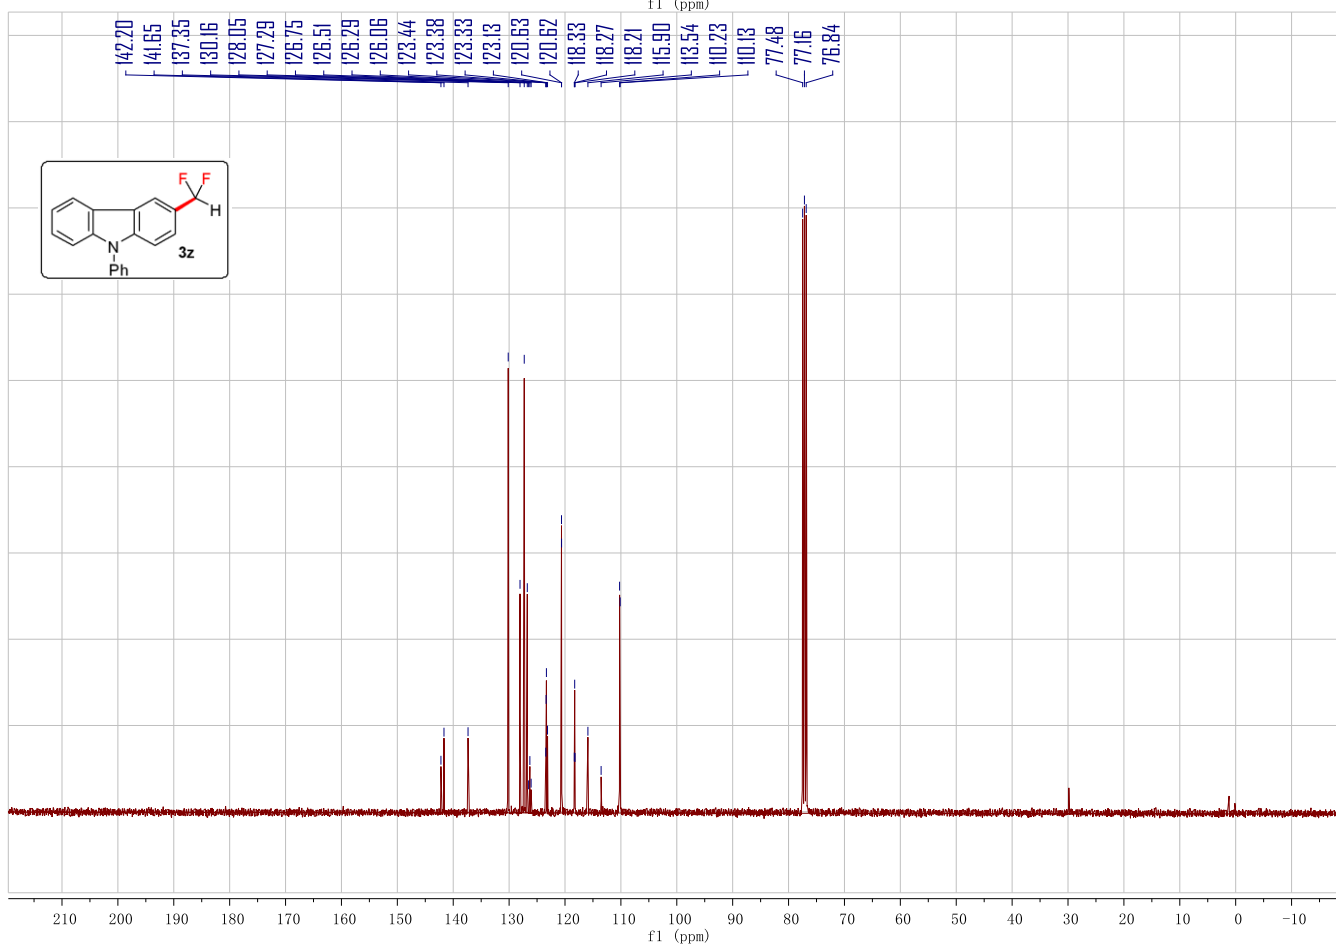

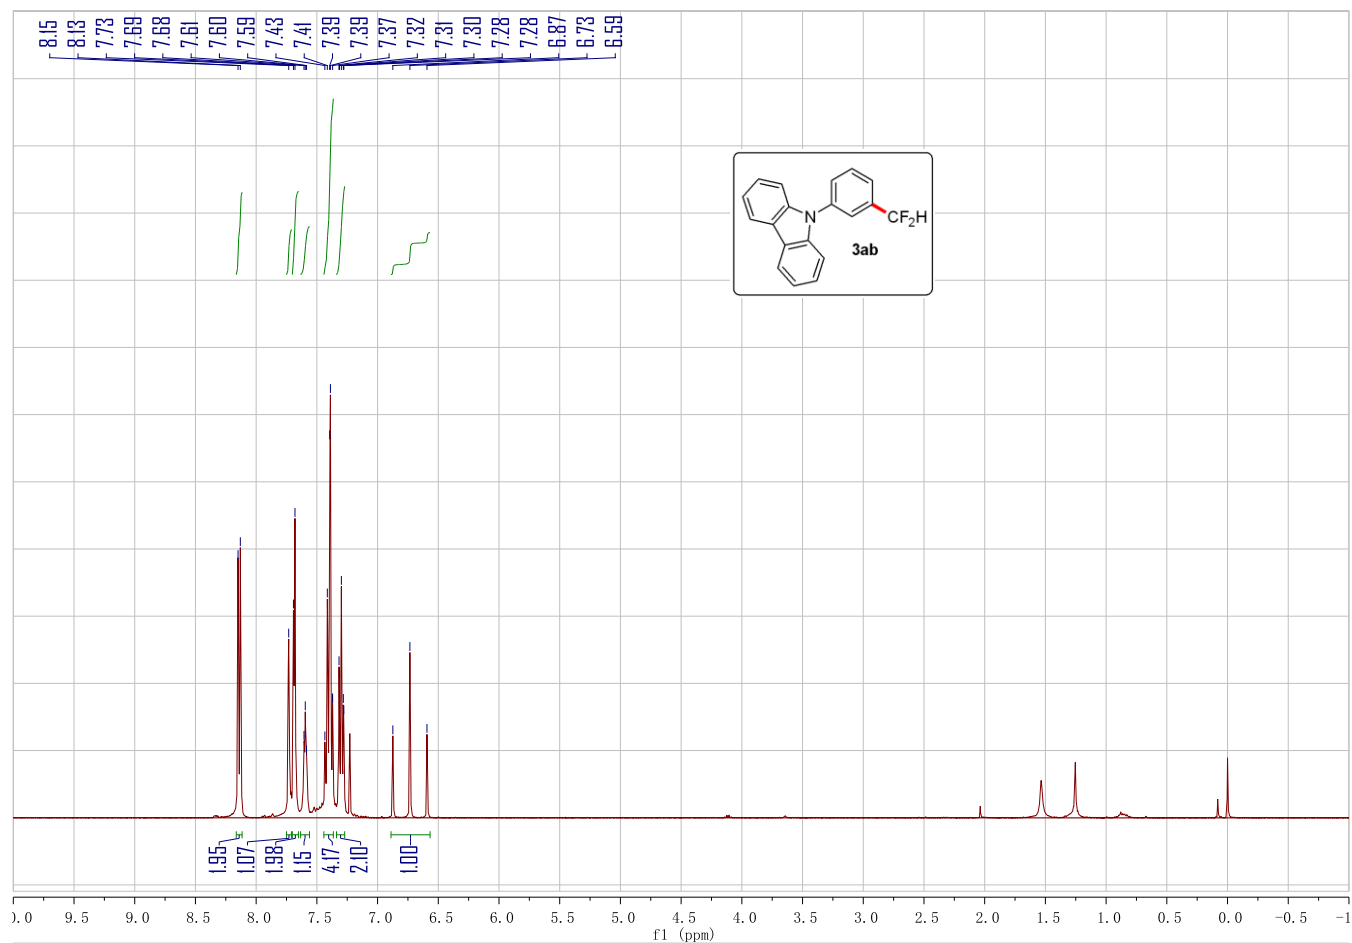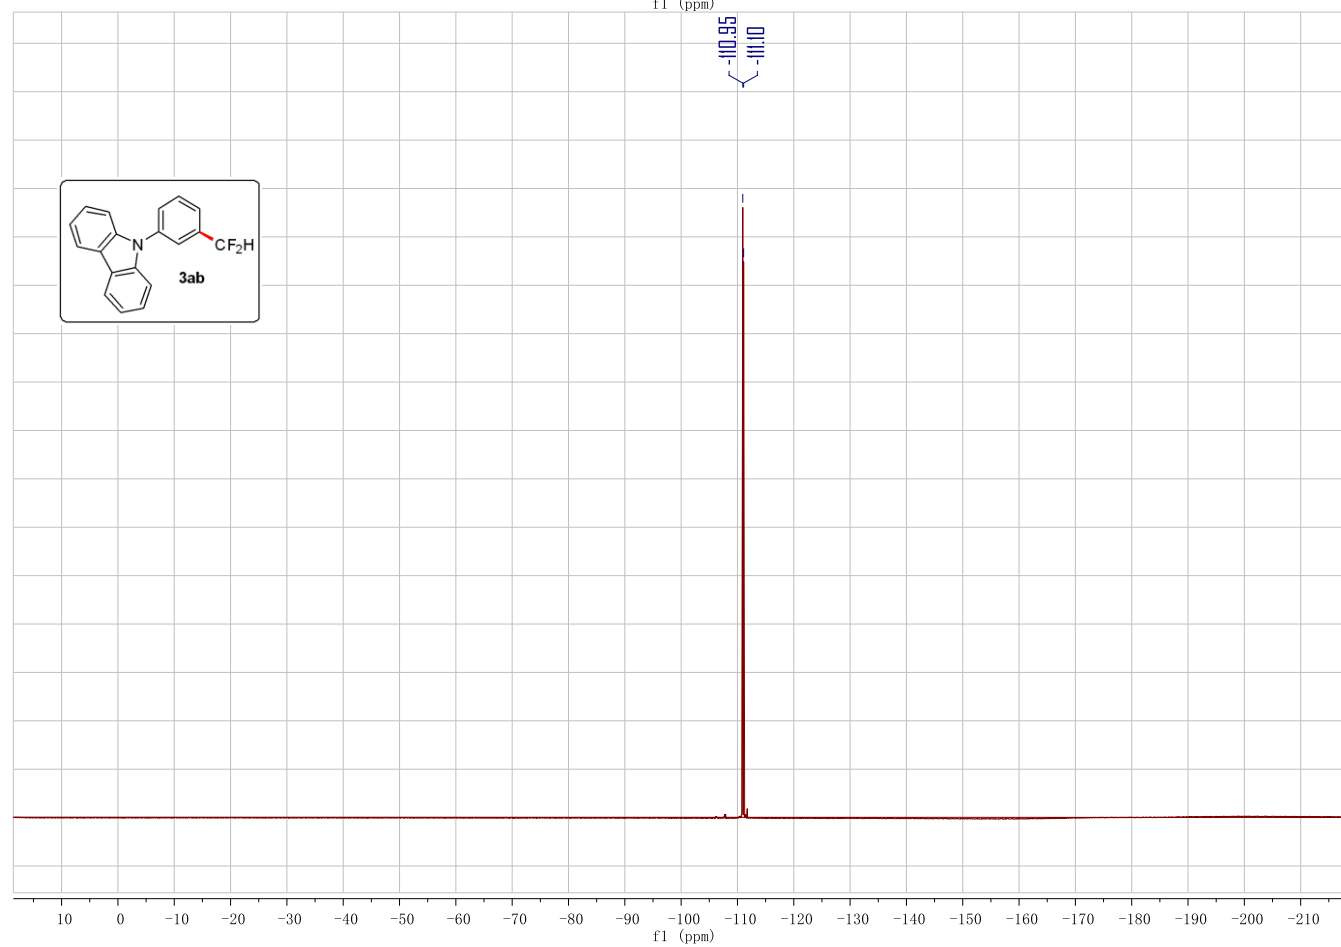

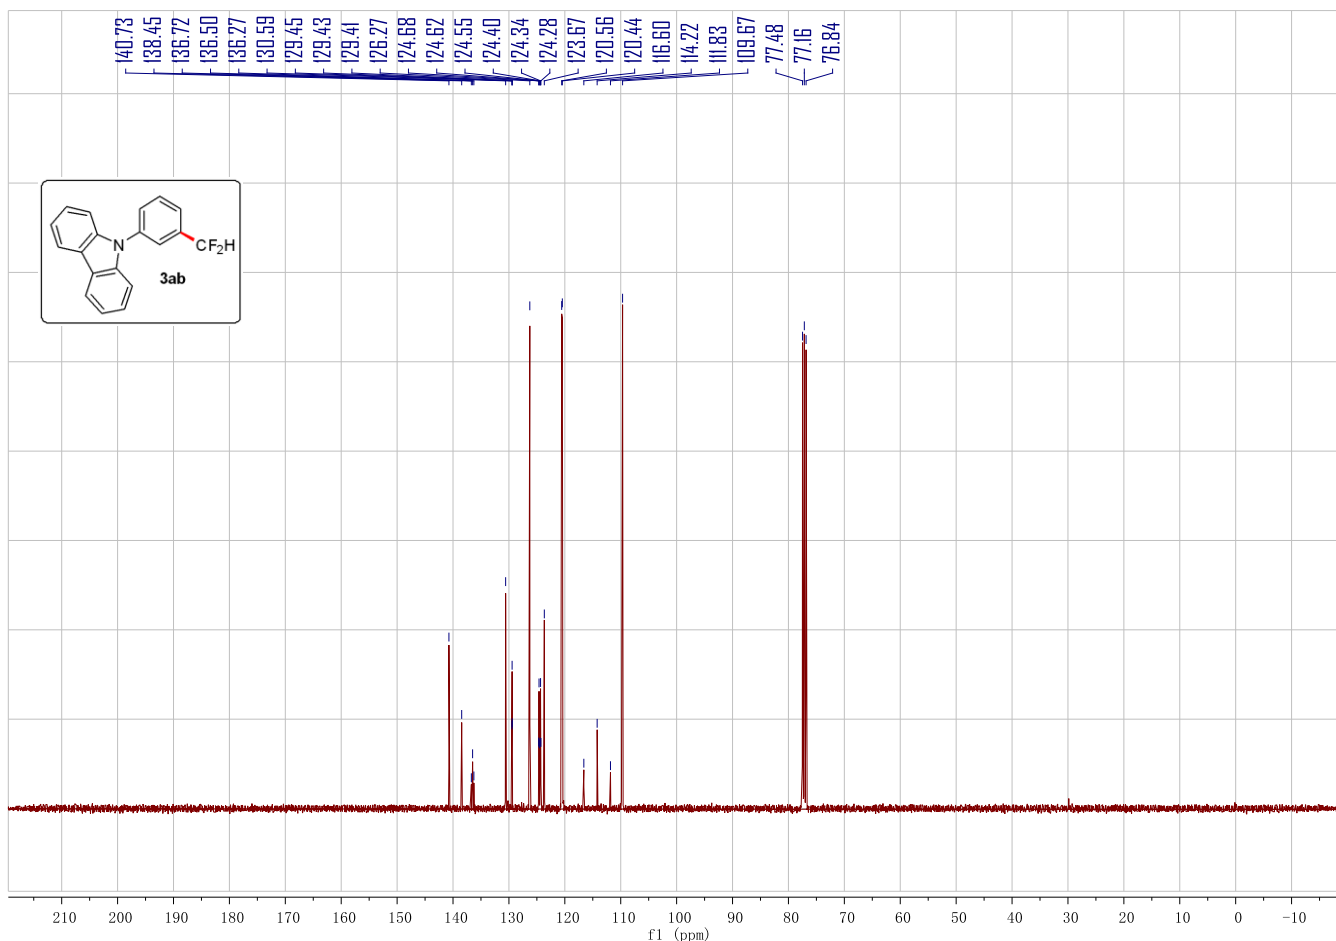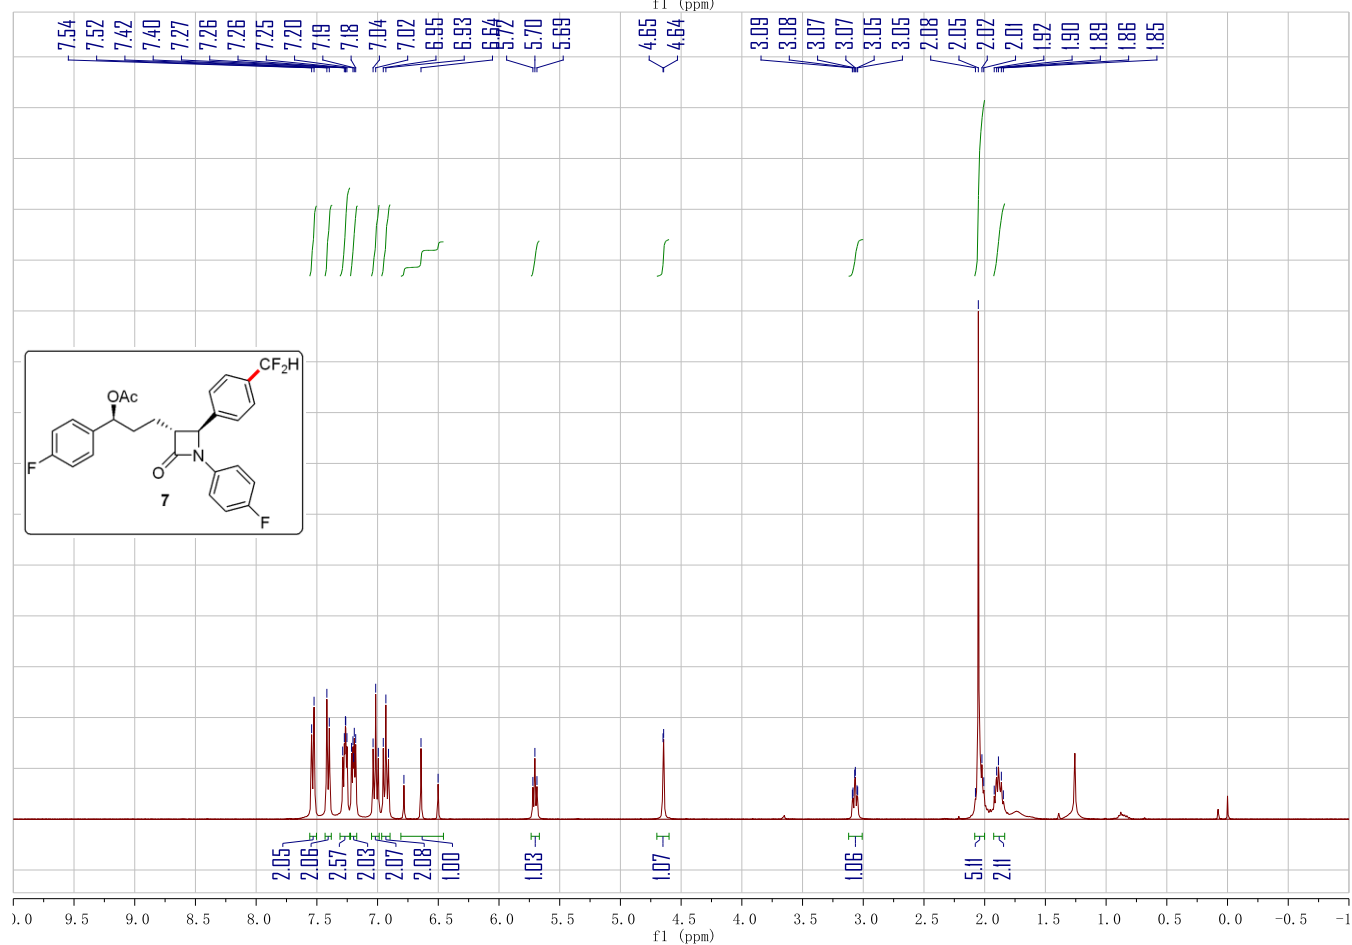

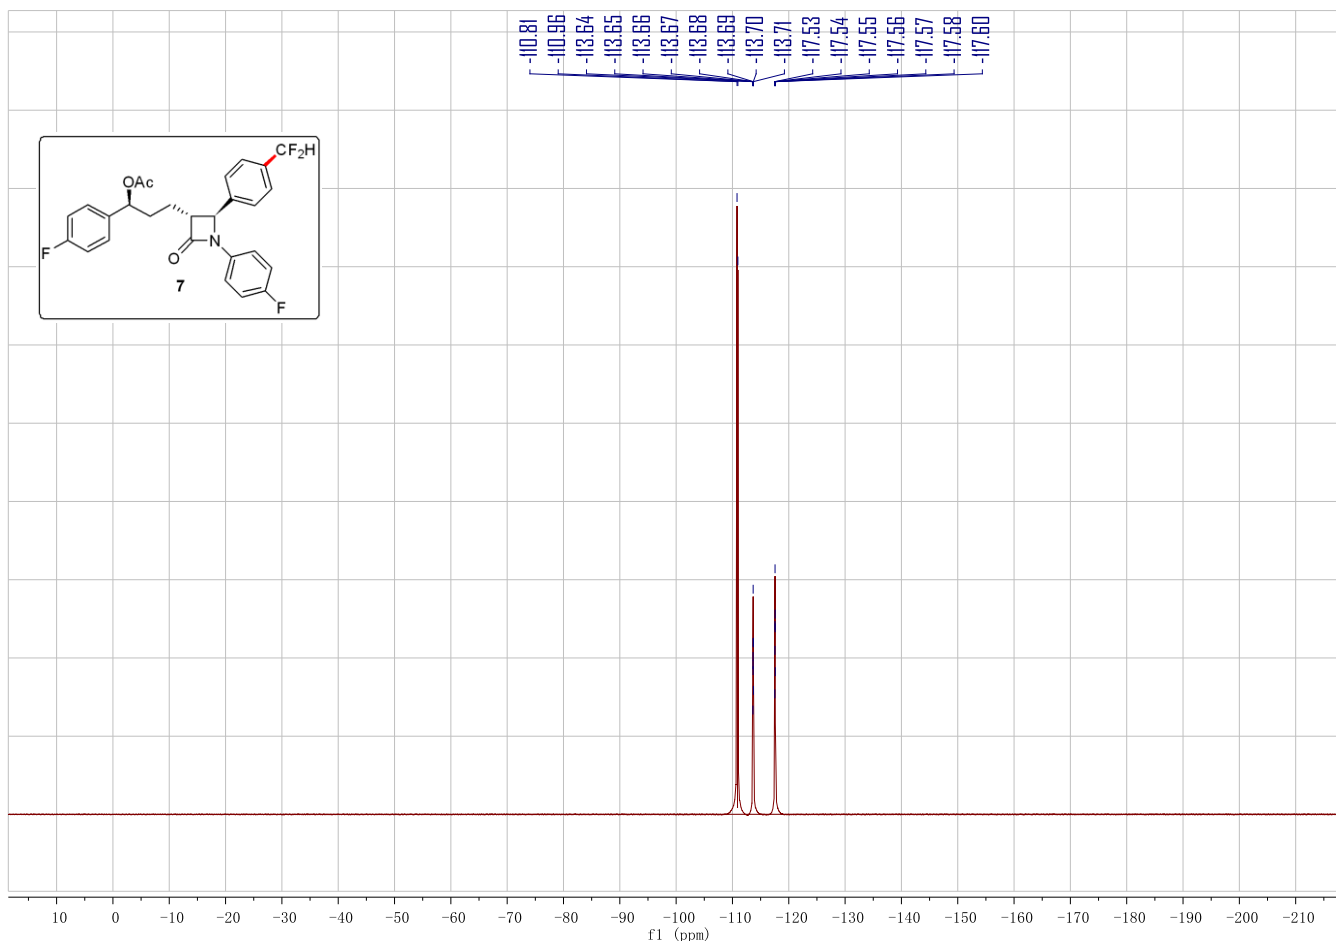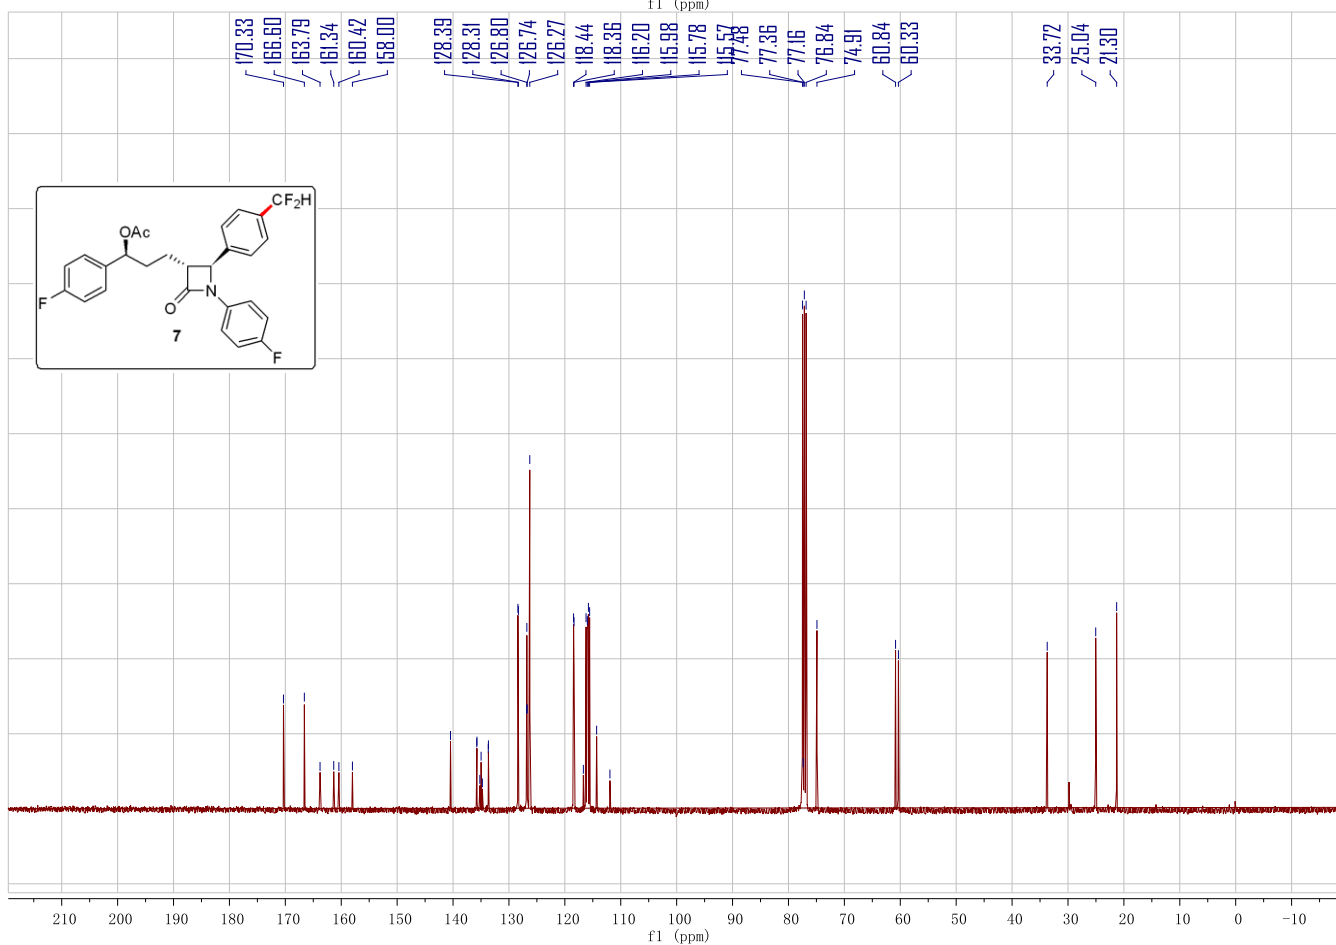

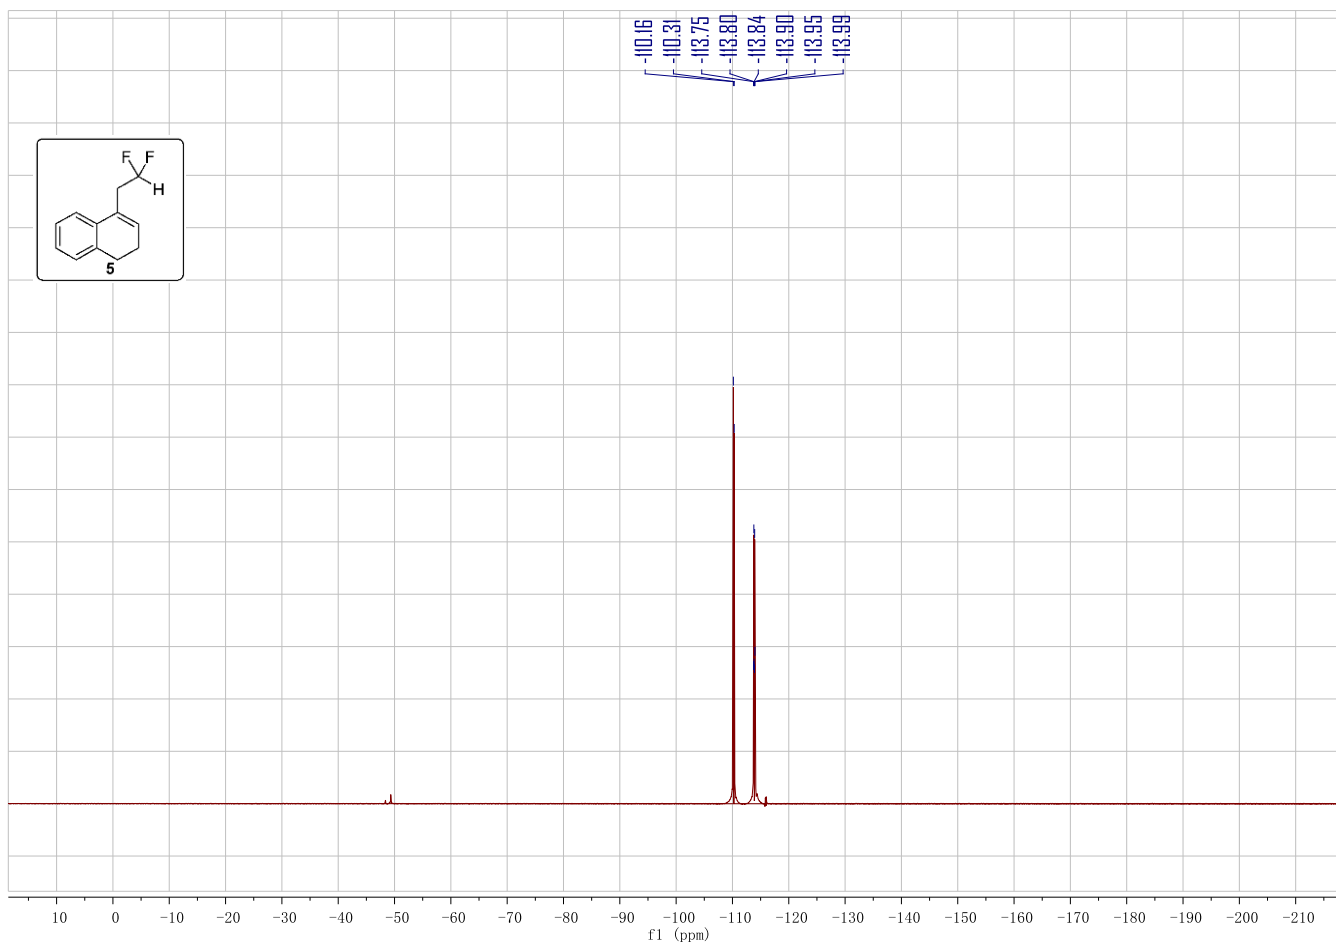

Supplement: c7qo00934h1.pdf [file c7qo00934h1.pdf]
